# Supplementary material
Source: publisher figshare collection journal article supplement (https://acs.figshare.com/ndownloader/files/5180362)
Supplement: Supplementary file 1 [file 5180362]

# Supporting Information

## Reactivity and Enantioselectivity in the Reactions of Scalemic Stereogenic $\alpha$ -(*N*-carbamoyl)alkylcuprates

R. Karl Dieter\*, Gabriel Oba, Kishan R. Chandupatla, Chris M. Topping, Kai Lu and  
Rhett T. Watson

Howard L. Hunter Laboratory, Department of Chemistry, Clemson University, Clemson, South Carolina 29634-0973.

|                                                  |      |
|--------------------------------------------------|------|
| Expanded Tables (1, 3-5) .....                   | S-2  |
| Experimental (General and Materials) .....       | S-4  |
| References .....                                 | S-5  |
| <sup>13</sup> C-NMR spectrum of <b>15a</b> ..... | S-7  |
| <sup>13</sup> C-NMR spectrum of <b>15b</b> ..... | S-8  |
| <sup>13</sup> C-NMR spectrum of <b>16</b> .....  | S-9  |
| <sup>13</sup> C-NMR spectrum of <b>17</b> .....  | S-10 |
| <sup>13</sup> C-NMR spectrum of <b>18</b> .....  | S-11 |
| <sup>13</sup> C-NMR spectrum of <b>19a</b> ..... | S-12 |
| <sup>13</sup> C-NMR spectrum of <b>20</b> .....  | S-13 |
| <sup>13</sup> C-NMR spectrum of <b>21</b> .....  | S-14 |
| <sup>13</sup> C-NMR spectrum of <b>22</b> .....  | S-15 |
| <sup>13</sup> C-NMR spectrum of <b>23</b> .....  | S-16 |
| <sup>13</sup> C-NMR spectrum of <b>24</b> .....  | S-17 |
| <sup>13</sup> C-NMR spectrum of <b>25</b> .....  | S-18 |
| <sup>13</sup> C-NMR spectrum of <b>26</b> .....  | S-19 |
| <sup>13</sup> C-NMR spectrum of <b>31</b> .....  | S-20 |
| <sup>13</sup> C-NMR spectrum of <b>33</b> .....  | S-21 |
| <sup>13</sup> C-NMR spectrum of <b>35</b> .....  | S-22 |
| HPLC trace for <b>14</b> .....                   | S-23 |
| HPLC trace for <b>15a</b> .....                  | S-24 |
| HPLC trace for <b>15b</b> .....                  | S-25 |
| HPLC trace for <b>16</b> .....                   | S-26 |
| HPLC trace for <b>18</b> .....                   | S-28 |
| HPLC trace for <b>19a</b> .....                  | S-29 |
| HPLC trace for <b>20</b> .....                   | S-30 |
| HPLC trace for <b>21</b> .....                   | S-31 |
| HPLC trace for <b>22</b> .....                   | S-32 |
| HPLC trace for <b>23</b> .....                   | S-33 |
| HPLC trace for <b>25</b> .....                   | S-35 |
| HPLC trace for <b>26</b> .....                   | S-36 |
| HPLC trace for <b>28a</b> .....                  | S-37 |
| HPLC trace for <b>31</b> .....                   | S-38 |
| HPLC trace for <b>35</b> .....                   | S-40 |

## Expanded Tables:

**Table 1. Reactions of scalemic  $\alpha$ -(*N*-carbamoyl)alkylcuprates, prepared from scalemic  $\alpha$ -lithio *N*-Boc pyrrolidine, with a variety of electrophiles.**

| entry | E <sup>+</sup> | Cu(I) equiv <sup>a</sup> | temperature Cu °C (min) <sup>b</sup> | solvent <sup>c</sup> | temperature Rxn, °C (h) <sup>d</sup> | Product <sup>e</sup>                                                                 | cpd No.    | % yield <sup>f</sup> | % er <sup>g</sup> |
|-------|----------------|--------------------------|--------------------------------------|----------------------|--------------------------------------|--------------------------------------------------------------------------------------|------------|----------------------|-------------------|
| 1     | <b>1</b>       | 0.5                      | -78 to -60 (60)                      | A                    | -60 to 25 (12)                       | 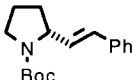   | <b>14</b>  | 85-90                | 50:50             |
| 2     | <b>1</b>       | 0.5                      | -78 to -60 (60)                      | B                    | -60 to 25 (12)                       |                                                                                      | <b>14</b>  | 85-98                | 90:10-93:7        |
| 3     | <b>1</b>       | 1.0                      | -78 to -60 (105)                     | B                    | -60 to 25 (12)                       |                                                                                      | <b>14</b>  | 70                   | 89:11             |
| 4     | <b>1</b>       | 0.5                      | -78 to -40 (120)                     | B                    | -60 to 25 (12)                       |                                                                                      | <b>14</b>  | 86                   | 73:27             |
| 5     | <b>1</b>       | 0.5 <sup>h</sup>         | -78 (45) 25 (15)                     | C                    | -60 to 25 (12)                       |                                                                                      | <b>14</b>  | 70                   | 51:49-55:45       |
| 6     | <b>2a</b>      | 0.5                      | -78 (60)                             | B                    | -78 to 25 (12)                       |    | <b>15a</b> | 69                   | 85:15             |
| 7     | <b>2a</b>      | 0.5                      | -78 (60)                             | B 1:1 <sup>i</sup>   | -78 to 25 (12)                       |                                                                                      | <b>15a</b> | 66                   | 88:12             |
| 8     | <b>2a</b>      | 0.5                      | -78 (60)                             | B 2:1 <sup>i</sup>   | -78 to 25 (12)                       |                                                                                      | <b>15a</b> | 68                   | 72.9:27.1         |
| 9     | <b>2a</b>      | 0.5                      | -78 (60)                             | B 4:1 <sup>i</sup>   | -78 to 25 (12)                       |                                                                                      | <b>15a</b> | 59                   | 71.5:28.5         |
| 10    | <b>2a</b>      | 1.0                      | -78 (60)                             | B 1:1.3 <sup>i</sup> | -78 to 25 (12)                       |                                                                                      | <b>15a</b> | 60                   | 72.5:27.5         |
| 11    | <b>2b</b>      | 1.0                      | -78 (60)                             | A                    | -78 to 25 (12)                       | <b>a</b> X = H                                                                       | <b>15b</b> | 77                   | 50:50             |
| 12    | <b>2b</b>      | 0.5                      | -78 (60)                             | B                    | -78 to 25 (12)                       | <b>b</b> X = SiMe <sub>3</sub>                                                       | <b>15b</b> | 96                   | 65.5:34.5         |
| 13    | <b>2b</b>      | 0.5                      | -78 (60)                             | B                    | -60 (10)                             |                                                                                      | <b>15b</b> | 90                   | 90:10             |
| 14    | <b>2c</b>      | 1.0                      | -78 (60)                             | A                    | -78 to 25 (12)                       |    | <b>16</b>  | 76                   | -                 |
| 15    | <b>2c</b>      | 1.0                      | -78 (60)                             | B 1:1.3              | -78 to 25 (12)                       |                                                                                      | <b>16</b>  | 70-83                | 97.3:92.7         |
| 16    | <b>2c</b>      | 1.0 <sup>j</sup>         | -78 (60)                             | B 1:1.3              | -78 to 25 (12)                       |                                                                                      | <b>16</b>  | 63-82                | 86.5:13.5-82:18   |
| 17    | <b>2c</b>      | 0.5                      | -78 (60)                             | B                    | -78 to 25 (12)                       |                                                                                      | <b>16</b>  | 66                   | 95.4:4.6          |
| 18    | <b>2d</b>      | 0.5                      | -78 (60)                             | B                    | -78 to 25 (12)                       |    | <b>17</b>  | 79                   | 94:6              |
| 19    | <b>2d</b>      | 0.5                      | -78 (60)                             | B                    | -78 to 25 (3-4)                      |                                                                                      | <b>17</b>  | 84 <sup>i</sup>      | 94:6              |
| 20    | <b>3a</b>      | 0.5                      | -78 (60)                             | B 1:1.3 <sup>i</sup> | -78 to 25 (12)                       |    | <b>18</b>  | 58                   | 90.7:9.3          |
| 21    | <b>4a</b>      | 0.5                      | -78 to -50 (60)                      | B                    | -50 to 25 (4)                        |   | <b>19a</b> | 63                   | 93:7              |
| 22    | <b>4a</b>      | 0.5                      | -78 (60)                             | B                    | -78 to 25 (12)                       |                                                                                      | <b>19a</b> | 89                   | 95.5:96.4         |
| 23    | <b>4a</b>      | 0.5 <sup>i</sup>         | -78 (60)                             | B                    | -78 to 25 (12)                       |                                                                                      | <b>19a</b> | 84                   | 93.5:6.5          |
| 24    | <b>4a</b>      | 0.5 <sup>k</sup>         | -78 (60)                             | B                    | -78 to 25 (12)                       |                                                                                      | <b>19a</b> | 53                   | 93.5:6.5          |
| 25    | <b>4a</b>      | 0.5 <sup>i</sup>         | -78 (60)                             | B                    | -78 to 25 (12)                       |                                                                                      | <b>19a</b> | 80                   | 90:10             |
| 26    | <b>4a</b>      | 1.0 <sup>j</sup>         | -78 (60)                             | B                    | -78 to 25 (12)                       | <b>a</b> R = H                                                                       | <b>19a</b> | 88                   | 86.5:13.5         |
| 27    | <b>4b</b>      | 0.5                      | -78 (60)                             | B                    | -78 to -35 (3)                       | <b>b</b> R = <i>n</i> -Bu                                                            | <b>19b</b> | 53 <sup>m</sup>      | 91:9              |
| 28    | <b>6a</b>      | 1.0                      | -78 (60)                             | B                    | -78 to 25 (12)                       |  | <b>20</b>  | 80                   | 50:50             |
| 29    | <b>6a</b>      | 0.5                      | -78 (60)                             | B                    | -78 to 25 (12)                       |                                                                                      | <b>20</b>  | 79                   | 65:35             |
| 30    | <b>6a</b>      | 0.5                      | -78 (60)                             | B                    | -40 (8)                              |                                                                                      | <b>20</b>  | 79                   | 80:20             |

<sup>a</sup> CuCN·2LiCl was employed and reactions run on a 1.0 mmole (**12**) scale unless otherwise noted. <sup>b</sup> Temperature and time at which cuprate formation was achieved. <sup>c</sup> A = THF. B = THF/Et<sub>2</sub>O solvent ratio (1:1, v/v, unless otherwise noted) arose by deprotonation of carbamate in Et<sub>2</sub>O followed by addition of a THF solution of CuCN·2LiCl. C = Et<sub>2</sub>O. <sup>d</sup> Temperature and time at which the cuprate/electrophile reaction was allowed to proceed. <sup>e</sup> Transmetalation and cuprate reactions assumed to proceed with retention of configuration<sup>1-3</sup> from scalemic *N*-Boc- $\alpha$ -lithiopyrrolidine.<sup>4</sup> Confirmed for **14**. <sup>f</sup> Based on products purified and isolated by flash column chromatography. <sup>g</sup> Enantioselectivity (% er) was measured by chiral stationary phase HPLC on a CHIRALCEL™ OD column [cellulose tris(3,5-dimethylphenylcarbamate) on silica gel]. <sup>h</sup> Solid CuCN was used. <sup>i</sup> 2.0 mmol scale. <sup>j</sup> CuCl·2LiCl was employed. <sup>k</sup> 6.0 mmol scale. <sup>l</sup> 10 mmol scale. <sup>m</sup> TMSCl (5.0 equiv) was employed.

**Table 3. Reactions of scalemic  $\alpha$ -(*N*-carbamoyl)alkylcuprates, prepared from scalemic  $\alpha$ -lithio *N*-Boc pyrrolidine, with propargyl and allylic substrates.**

| entry | E <sup>+</sup> (LG) | Cu(I) equiv <sup>a</sup> | temperature Cu °C (min) <sup>b</sup> | solvent <sup>c</sup> | temperature Rxn, °C (h) <sup>d</sup> | Product <sup>e</sup> | cpd. No.  | % yield <sup>f</sup> | % er <sup>g</sup> |
|-------|---------------------|--------------------------|--------------------------------------|----------------------|--------------------------------------|----------------------|-----------|----------------------|-------------------|
| 1     | <b>8a</b> Br        | 1.0                      | -78 (60)                             | A                    | -78 to 25 (12)                       |                      | <b>23</b> | 74                   | 50:50             |
| 2     | <b>8a</b> Br        | 0.5                      | -78 (60)                             | B                    | -78 to 25 (12)                       |                      | <b>23</b> | 48                   | 75:25             |
| 3     | <b>8a</b> Br        | 0.5                      | -78 (60)                             | B                    | -78 to 25 (12)                       |                      | <b>23</b> | 71                   | 66.7:33.3         |
| 4     | <b>8b</b> OMs       | 1.0                      | -78 (60)                             | B                    | -78 to 25 (12)                       |                      | <b>23</b> | 76                   | 58.4:41.6         |
| 5     | <b>8b</b> OMs       | 0.5                      | -78 (60)                             | B                    | -78 to 25 (12)                       |                      | <b>23</b> | 58                   | 74.4:25.6         |
| 6     | <b>8c</b> OMs       | 1.0                      | -78 (60)                             | A                    | -78 to 25 (12)                       |                      | <b>24</b> | 86                   | 50:50             |
| 7     | <b>8c</b> OMs       | 1.0                      | -78 (60)                             | B                    | -50 (10)                             |                      | <b>24</b> | 79                   | 50:50             |
| 8     | <b>8c</b> OMs       | 0.5                      | -78 (60)                             | B                    | -78 (5)                              |                      | <b>24</b> | 57                   | 90:10             |
| 9     | <b>8d</b> OMs       | 1.0                      | -78 to -50 (30)                      | B                    | -78 to 25 (12)                       |                      | <b>25</b> | 57                   | 65:35             |
| 10    | <b>8d</b> OMs       | 1.0                      | -78 to -50 (60)                      | B                    | -78 (5)                              |                      | <b>25</b> | 40-56                | 68:32-77:23       |
| 11    | <b>8d</b> OMs       | 0.5                      | -78 (60)                             | B                    | -78 to 25 (12)                       |                      | <b>25</b> | 33                   | 69:31             |
| 12    | <b>9</b> Br         | 1.0                      | -78 (60)                             | A                    | -78 to 25 (12)                       |                      | <b>26</b> | 70                   | -                 |
| 13    | <b>9</b> Br         | 0.5                      | -78 (60)                             | B                    | -78 to 25 (12)                       |                      | <b>26</b> | 100                  | 89:11             |

<sup>a</sup> CuCN·2LiCl was employed unless otherwise noted. <sup>b</sup> Temperature and time at which cuprate formation was achieved. <sup>c</sup> A = THF. B = THF/Et<sub>2</sub>O solvent ratio (1:1, v/v) arose by deprotonation of carbamate in Et<sub>2</sub>O followed by addition of a THF solution of CuCN·2LiCl. <sup>d</sup> Temperature and time at which the cuprate/electrophile reaction was allowed to proceed. <sup>e</sup> Transmetalation and cuprate reactions assumed to proceed with retention of configuration<sup>1-3</sup> from scalemic *N*-Boc- $\alpha$ -lithiopyrrolidine. <sup>f</sup> Based on products purified and isolated by flash column chromatography. <sup>g</sup> Enantioselectivity (% er) was measured by chiral stationary phase HPLC on a CHIRALCEL<sup>TM</sup> OD column [cellulose tris(3,5-dimethylphenylcarbamate) on silica gel].

**Table 4. Reactions of scalemic  $\alpha$ -(*N*-carbamoyl)alkylcuprates, prepared from scalemic  $\alpha$ -lithio *N*-Boc pyrrolidine with  $\alpha,\beta$ -unsaturated carbonyl compounds.**

| entry | E <sup>+</sup> | Cu(I) equiv <sup>a</sup> | temperature Cu °C (min) <sup>b</sup> | solvent <sup>c</sup> | temperature Rxn, °C (h) <sup>d</sup> | Product <sup>e</sup> | cpd. No.   | % yield <sup>f</sup> | % er <sup>g</sup>  |
|-------|----------------|--------------------------|--------------------------------------|----------------------|--------------------------------------|----------------------|------------|----------------------|--------------------|
| 1     | <b>10</b>      | 1.0                      | -78 (60)                             | B                    | -78 to 35 (3)                        |                      | <b>27</b>  | 56 <sup>h</sup>      | 72:28 <sup>h</sup> |
| 2     | <b>11a</b>     | 1.0                      | -78 (60)                             | A                    | -78 (30), 25 (12)                    |                      | <b>28a</b> | 75                   | -                  |
| 3     | <b>11a</b>     | 1.0                      | -78 (60)                             | B                    | -78 (30), 25 (12)                    |                      | <b>28a</b> | 54                   | 97.6:2.4           |
| 4     | <b>11a</b>     | 1.0 <sup>i</sup>         | -78 (60)                             | B                    | -78 (30), 25 (12)                    |                      | <b>28a</b> | 55                   | 98:2               |
| 5     | <b>11a</b>     | 0.5                      | -78 (60)                             | B                    | -78 (30), 25 (12)                    |                      | <b>28a</b> | 53                   | 97:3               |
| 6     | <b>11a</b>     | 0.5                      | -78 (60)                             | B                    | -78 (30), 25 (12)                    |                      | <b>28a</b> | 91                   | 90:10              |
| 7     | <b>11b</b>     | 1.0                      | -78 (60)                             | B                    | -78 to 25 (12)                       |                      | <b>28b</b> | 95                   | 50:50              |
| 8     | <b>11b</b>     | 1.0                      | -78 (60)                             | B                    | -50 (10)                             |                      | <b>28b</b> | 39                   | 50:50              |
| 9     | <b>11b</b>     | 0.5                      | -78 (60)                             | B                    | -78 to 25 (12)                       |                      | <b>28b</b> | 60                   | 50:50              |
| 10    | <b>11c</b>     | 1.0                      | -78 (60)                             | A                    | -55 to 25 (12)                       |                      | <b>28c</b> | 60                   | -                  |
| 11    | <b>11c</b>     | 1.0                      | -78 (60)                             | B                    | -55 to 25 (12)                       |                      | <b>28c</b> | 72                   | 50:50              |
| 12    | <b>11c</b>     | 0.5                      | -78 (60)                             | B                    | -55 to 25 (12)                       |                      | <b>28c</b> | 88                   | 60:40 <sup>j</sup> |

<sup>a</sup> CuCN·2LiCl was employed unless otherwise noted. <sup>b</sup> Temperature and time at which cuprate formation was achieved. <sup>c</sup> A = THF. B = THF/Et<sub>2</sub>O, solvent ratio (1:1, v/v) arose by deprotonation of carbamate in Et<sub>2</sub>O followed by addition of a THF solution of CuCN·2LiCl. <sup>d</sup> Temperature and time at which the cuprate/electrophile reaction was allowed to proceed. TMSCl (5.0 equiv) was employed as an additive. <sup>e</sup> Transmetalation and cuprate reactions assumed to proceed with retention of configuration<sup>1-3</sup> from scalemic *N*-Boc- $\alpha$ -lithiopyrrolidine. <sup>f</sup> Based on products purified and isolated by chromatography. <sup>g</sup> Enantioselectivity (% er) was measured by chiral stationary phase HPLC on a CHIRALCEL<sup>TM</sup> OD column [cellulose tris(3,5-dimethylphenylcarbamate) on silica gel]. <sup>h</sup> *E*:*Z* = 59:41, 72:28 er for each diastereomer. <sup>i</sup> <sup>t</sup>Bu<sub>3</sub>P (2.0 equiv) was added to solubilize CuCN. <sup>j</sup> HMPA/TMSCl (2.0 equiv) was added along with the methyl acrylate.

**Table 5. Reactions of scalemic  $\alpha$ -(*N*-carbamoyl)alkylcuprates, prepared from scalemic  $\alpha$ -lithio *N*-Boc-*N*-ethylbenzylamine (30b) with methyl vinyl ketone.**

$\text{Ph-CH(R)-NHBoc} \xrightarrow[\text{(-)-sparteine}]{s\text{-BuLi}} \text{Ph-CH(Li)-NHBoc} \xrightarrow[\text{3. methyl vinyl ketone}]{\text{2. CuCN}\cdot\text{2 } n\text{Bu}_3\text{P (2.0 equiv)}} \text{Ph-CH(R)-CH}_2\text{-CH}_2\text{-COMe}$

**29a** R = Me                      **30**                      **31**  
**b** R = Et

| entry | temperature<br><i>s</i> -BuLi °C (h) <sup>a</sup> | solvent           | temperature<br>Rxn, °C (h) <sup>b</sup> | %<br>yield <sup>c,d</sup> | % er <sup>e,f</sup><br>( <i>R</i> ):( <i>S</i> ) <sup>g</sup> |
|-------|---------------------------------------------------|-------------------|-----------------------------------------|---------------------------|---------------------------------------------------------------|
| 1     | -78 (2)                                           | Et <sub>2</sub> O | -60 (4) to 25 (12)                      | 57                        | 50:50                                                         |
| 2     | -78 (3)                                           | Et <sub>2</sub> O | -78 to 25 (12)                          | 53                        | 50:50                                                         |
| 3     | -78 (2)                                           | Et <sub>2</sub> O | -70 (0.5), 25 (12) <sup>h</sup>         | 54                        | 30.5:69.5                                                     |
| 4     | -78 (2)                                           | Et <sub>2</sub> O | -60 (0.5), 25 (12) <sup>h</sup>         | 55                        | 28.9:79.1                                                     |
| 5     | -60 (1)                                           | Et <sub>2</sub> O | -60 (0.5), 25 (12)                      | 53                        | 32:68                                                         |
| 6     | -60 (3)                                           | Et <sub>2</sub> O | -60 (0.5), 25 (12)                      | 48                        | 35.7:66.3                                                     |
| 7     | -78 (3)                                           | Et <sub>2</sub> O | -78 (0.5), 25 (12)                      | 51                        | 28.3:71.7                                                     |
| 8     | -78 (5)                                           | Et <sub>2</sub> O | -78 (0.5), 25 (12)                      | 59                        | 31:69                                                         |
| 9     | -78 (2)                                           | THF               | -60 (4) to 25 (12)                      | 63                        | 53.3:46.7                                                     |
| 10    | -78 (2), -60 (1)                                  | THF               | -60 (0.5), 25 (12)                      | 79                        | 59.5:40.5                                                     |
| 11    | -78 (2.5) <sup>i</sup>                            | THF               | -78 to 25 (12)                          | 50                        | 53.5:46.5                                                     |

<sup>a</sup> Temperature and time at which deprotonation was effected. Cuprate formation was achieved at -78 °C for 30 min. R<sub>2</sub>CuLi·LiCN was employed unless noted. <sup>b</sup> Temperature and time at which the cuprate/electrophile reaction was allowed to proceed. TMSCl (2.5 equiv) was employed as an additive. <sup>c</sup> Based on products purified and isolated by chromatography. <sup>d</sup> Transmetalation and cuprate reactions assumed to proceed with retention of configuration<sup>1-3</sup> from the scalemic lithium reagent (*S*)-**30** in Et<sub>2</sub>O.<sup>5a-c</sup> <sup>e</sup> Enantioselectivity (% er) was measured by chiral stationary phase HPLC on a CHIRALCEL<sup>TM</sup> OD column [cellulose tris(3,5-dimethylphenylcarbamate) on silica gel]. <sup>f</sup> Major isomer reported in order of elution time (i.e., first in THF and last in Et<sub>2</sub>O). <sup>g</sup> Configuration assigned in accord with the assumptions and assignments reported for **29a**.<sup>5a-c</sup> <sup>h</sup> These reactions were performed side-by-side at the same time. <sup>i</sup> CuCN·2LiCl (1.0 equiv) was employed to afford RCuCNLi.

## Experimental

**General.** NMR spectra were recorded as CDCl<sub>3</sub> solutions on a Bruker AC-300 or JEOL 500 MHz instrument. The <sup>1</sup>H NMR chemical shifts are reported as δ values in parts per million (ppm) relative to tetramethylsilane (TMS) or CHCl<sub>3</sub> (δ = 7.26 ppm) as internal standard. The <sup>13</sup>C NMR chemical shifts are reported as δ values in parts per million (ppm) downfield from TMS and referenced with respect to the CDCl<sub>3</sub> signal (triplet, centerline δ = 77.0 ppm). Infrared spectra (IR) were recorded on a Nicolet Magna 550 FT-IR spectrometer as neat samples (liquid films on NaCl plates) unless otherwise noted. Gas chromatography/mass spectrometry measurements were performed on a Hewlett-Packard 5890A GC coupled to a 5970B mass selective detector at 70 eV. Analytical thin-layer chromatography (TLC) was performed on Scientific Adsorbents Inc. silica gel plates, 200 μ mesh with F-254 indicator. Visualization was accomplished by UV light (254 nm), 4% ethanol solution of phosphomolybdic acid, 5% *p*-anisaldehyde, or 5% H<sub>2</sub>SO<sub>4</sub>-90% EtOH solution. Flash column chromatography was performed with 200-400 μ mesh silica gel.

THF and Et<sub>2</sub>O were dried over sodium/benzophenone ketyl and LiCl was flame dried under vacuum in a round bottom flask before use. CuCN was used directly from the bottle as purchased from ACROS. *sec*-Butyllithium was either obtained from FMC corporation or prepared<sup>6</sup> from *sec*-butyl chloride and FMC's Stabi-Li-ze lithium powder. Enantiomeric ratios were determined on a Chiral Technologies, Inc. CHIRALCEL OD [cellulose tris(3,5-dimethylphenylcarbamate) on a 10  $\mu$ m silica-gel substrate] chiral stationary phase HPLC column (250 x 4.0 mm, L x D).

The benzyl carbamate derived from the methyl ester of proline displays a barrier to rotation [ $\Delta G^\ddagger$  = 17.1-17.4 Kcal/mole] that is relatively insensitive to solvent.<sup>7</sup> A  $\Delta G^\ddagger$  = 17.4 Kcal/mole corresponds to a coalescence temperature of 87.3 °C while a value of  $\Delta G^\ddagger$  = 16.7 corresponds to 61.4 °C for coalescence.<sup>8</sup> Compounds containing the *N*-Boc carbamate functionality generally display absorptions in the <sup>1</sup>H and <sup>13</sup>C NMR spectra attributable to rotomers arising from restricted rotation about the C-N bond. Additional absorptions due to rotomers are indicated within parentheses.

**Materials:** Hydroboration<sup>9a</sup> or hydroalumination<sup>9b</sup> of commercially available phenyl acetylene followed by iodination of the carbon-metal bond gave (*E*)-1-iodo-2-phenylethene (**1**). Vinyl bromide (**2a**) and 1-bromo-1-trimethylsilylethene (**2b**) were commercially available (Aldrich) while Markovnikov addition of in situ generated HI<sup>10</sup> to the appropriate commercially available 1-alkynes afforded 2-iodo-1-alkenes **2c** and **2d** (after silylation with <sup>t</sup>BuMe<sub>2</sub>SiCl) in good yields. Addition of HI (LiI/AcOH)<sup>11</sup> to commercially available ethyl propiolate (**10**) or to ethyl 2-heptynonate (for preparation of the methyl ester see reference 23b) stereoselectively gave (*Z*)- $\beta$ -iodoenoates **4a-b**, respectively. Vinyl iodide **6a**,<sup>12</sup> triflates **3b**,<sup>13</sup> **7a**<sup>13</sup> and **7b**<sup>14</sup> and nonaflate **3c**<sup>15</sup> were prepared by established methods. Triflate **3b** could be converted into 1-iodocyclohexene **3a**.<sup>16</sup> Triflate **6b** was prepared by a literature procedures.<sup>17</sup>

Propargyl mesylate **8b** was prepared from propargyl alcohol<sup>18a</sup> while propargyl mesylates **8c-d** were prepared by lithiation of the commercially available 1-alkynes followed by hydroxymethylation with paraformaldehyde<sup>19</sup> and mesylation.<sup>18</sup> Propargyl bromide **8a**, allyl bromide **9**, ethyl propiolate **10**, methyl vinyl ketone **11a** and methyl acrylate **11c** are commercially available. Data reduction for compounds **14**,<sup>21,22a</sup> **15a**,<sup>22a</sup> **19a-b**,<sup>20</sup> **26**,<sup>22b</sup> **27**,<sup>21</sup> **28a**<sup>23a</sup> and **28c**<sup>23b</sup> has been reported.

## References

1. Hutchinson, D. K.; Fuchs, P. L. *J. Am. Chem. Soc.* **1987**, *109*, 4930-4939.
2. (a) Linderman, R. J.; Griedel, B. D. *J. Org. Chem.* **1990**, *55*, 5428-5430. (b) Linderman, R. J.; Griedel, B. D. *J. Org. Chem.* **1991**, *56*, 5491-5493. (c) Tomooka, K.; Shimizu, H.; Nakai, T. *J. Organomet. Chem.* **2001**, *624*, 364-366. (d) Rychnovsky, S. D.; Buckmelter, A. J.; Dahanukar, V. H.; Skaltzky, D. J. *J. Org. Chem.* **1999**, *64*, 6849-6860.

3. Dieter, R. K.; Topping, C. M.; Chandupatla, K. R.; Lu, K. *J. Am. Chem. Soc.* **2001**, *123*, 5132-5133.
4. (a) Kerrick, S. T.; Beak, P. *J. Am. Chem. Soc.* **1991**, *113*, 9708-9710. (b) Beak, P.; Kerrick, S. T.; Wu, S.; Chu, J. *J. Am. Chem. Soc.* **1994**, *116*, 3231-3239.
5. (a) Schlosser, M.; Limat, D. *J. Am. Chem. Soc.* **1995**, *117*, 12342-12343. (b) Voyer, N.; Roby, J. *Tetrahedron Lett.* **1995**, *36*, 6627-6630. (c) Barberis, C.; Voyer, N.; Roby, J.; Chénard, S.; Tremblay, M.; Labrie, P. *Tetrahedron* **2001**, *57*, 2965-2972.
6. Dieter, R. K.; Topping, C. M.; Nice, L. E. *J. Org. Chem.* **2001**, *66*, 2302.
7. Cox, C.; Lectka, T. *J. Org. Chem.* **1998**, *63*, 2426.
8. Grunwald, E.; Jumper, C. F.; Meiboom, S. *J. Am. Chem. Soc.* **1963**, *85*, 522.
9. (a) Brown, H. C.; Hamaoka, T.; Ravindran, N. *J. Am. Chem. Soc.* **1973**, *95*, 5786-5788. (b) Zweifel, G.; Whitney, C. C. *J. Am. Chem. Soc.* **1967**, *89*, 2753-2754.
10. Kamiya, N.; Chikami, Y.; Ishii, Y. *Synlett* **1990**, 675-676.
11. (a) Ma, S.; Lu, X.; Li, Z. *J. Org. Chem.* **1992**, *57*, 709-713. (b) Dieter, R. K.; Lu, K. *J. Org. Chem.* **2002**, *67*, 847-855.
12. Piers, E.; Grierson, J. R.; Lau, C. K.; Nagakura, I. *Can. J. Chem.* **1982**, *60*, 210-223.
13. (a) Mori, K.; Matsushima, Y. *Synthesis*, **1995**, 845-850. (b) Martinez, A. G.; Herrera, A.; Martinez, R.; Teso, E.; Garcia, A.; Osio, J.; Pargada, L.; Unanue, R. *J. Heterocyclic Chem.* **1988**, *25*, 1237-1241.
14. Summerville, R. H.; Senkler, C. A.; Schleyer, P. V. R.; Dueber, T. E.; Stang, P. J. *J. Am. Chem. Soc.* **1974**, *96*, 1100-1110.
15. (a) Lyapkalo, I. M.; Webel, M.; Reissig, H.-U. *Synlett* **2001**, 1293-1295. (b) Bellina, F.; Ciucci, D.; Rossi, R.; Vergamini, P. *Tetrahedron* **1999**, *55*, 2103-2112.
16. (a) Su, Z.; Paquette, L. A.; *J. Org. Chem.* **1995**, *60*, 764-766. (b) Martinez, A. G.; Alvarez, R. M.; Fraile, A. G. *Synthesis* **1986**, 222-224.
17. (a) Kim, H.-O.; Ogbu, C. O.; Nelson, S.; Kahn, M. *Synlett.* **1998**, 1059-1060. (b) Martinez, G.; Alvarez, R. M.; Casado, M. M.; Subramanian, L. R.; Hanack, M. *Tetrahedron* **1987**, *43*, 275-279.
18. (a) Jackson, R. W.; Perlmutter, P.; Smallridge, A. J. *Aust. J. Chem.* **1988**, *41*, 1201-1208. (b) Claesson, A.; Sahlberg, C. *Tetrahedron* **1982**, *38*, 363-368.
19. (a) Brandsma, L.; "Preparative Acetylenic Chemistry", 1st Ed., Elsevier, Amsterdam, **1971**, p. 69. (b) Zwierzak, A.; Tomassy, B. *Synthetic. Commun.* **1996**, *26*, 3593-3600.
20. Dieter, R. K.; Lu, K. *J. Org. Chem.* **2002**, *67*, 847-855.
21. Dieter, R. K.; Topping, C. M.; Chandupatla, K. R.; Lu, K. *J. Am. Chem. Soc.* **2001**, *123*, 5132-5133.
22. (a) Serino, C.; Stehle, N.; Park, Y. S.; Florio, S.; Beak, P. J. *J. Org. Chem.* **1999**, *64*, 1160-1165. (b) Park, S. O.; Kang, H. J.; Ko, S.; Park, S.; Chang, S. *Tetrahedron: Asymmetry* **2001**, *12*, 2621-2624.
23. (a) Dieter, R. K.; Alexander, C. W.; Nice, L. E. *Tetrahedron* **2000**, *56*, 2767-2778. (b) Dieter, R. K.; Lu, K.; Velu, S. E. *J. Org. Chem.* **2000**, *65*, 8715-8724.

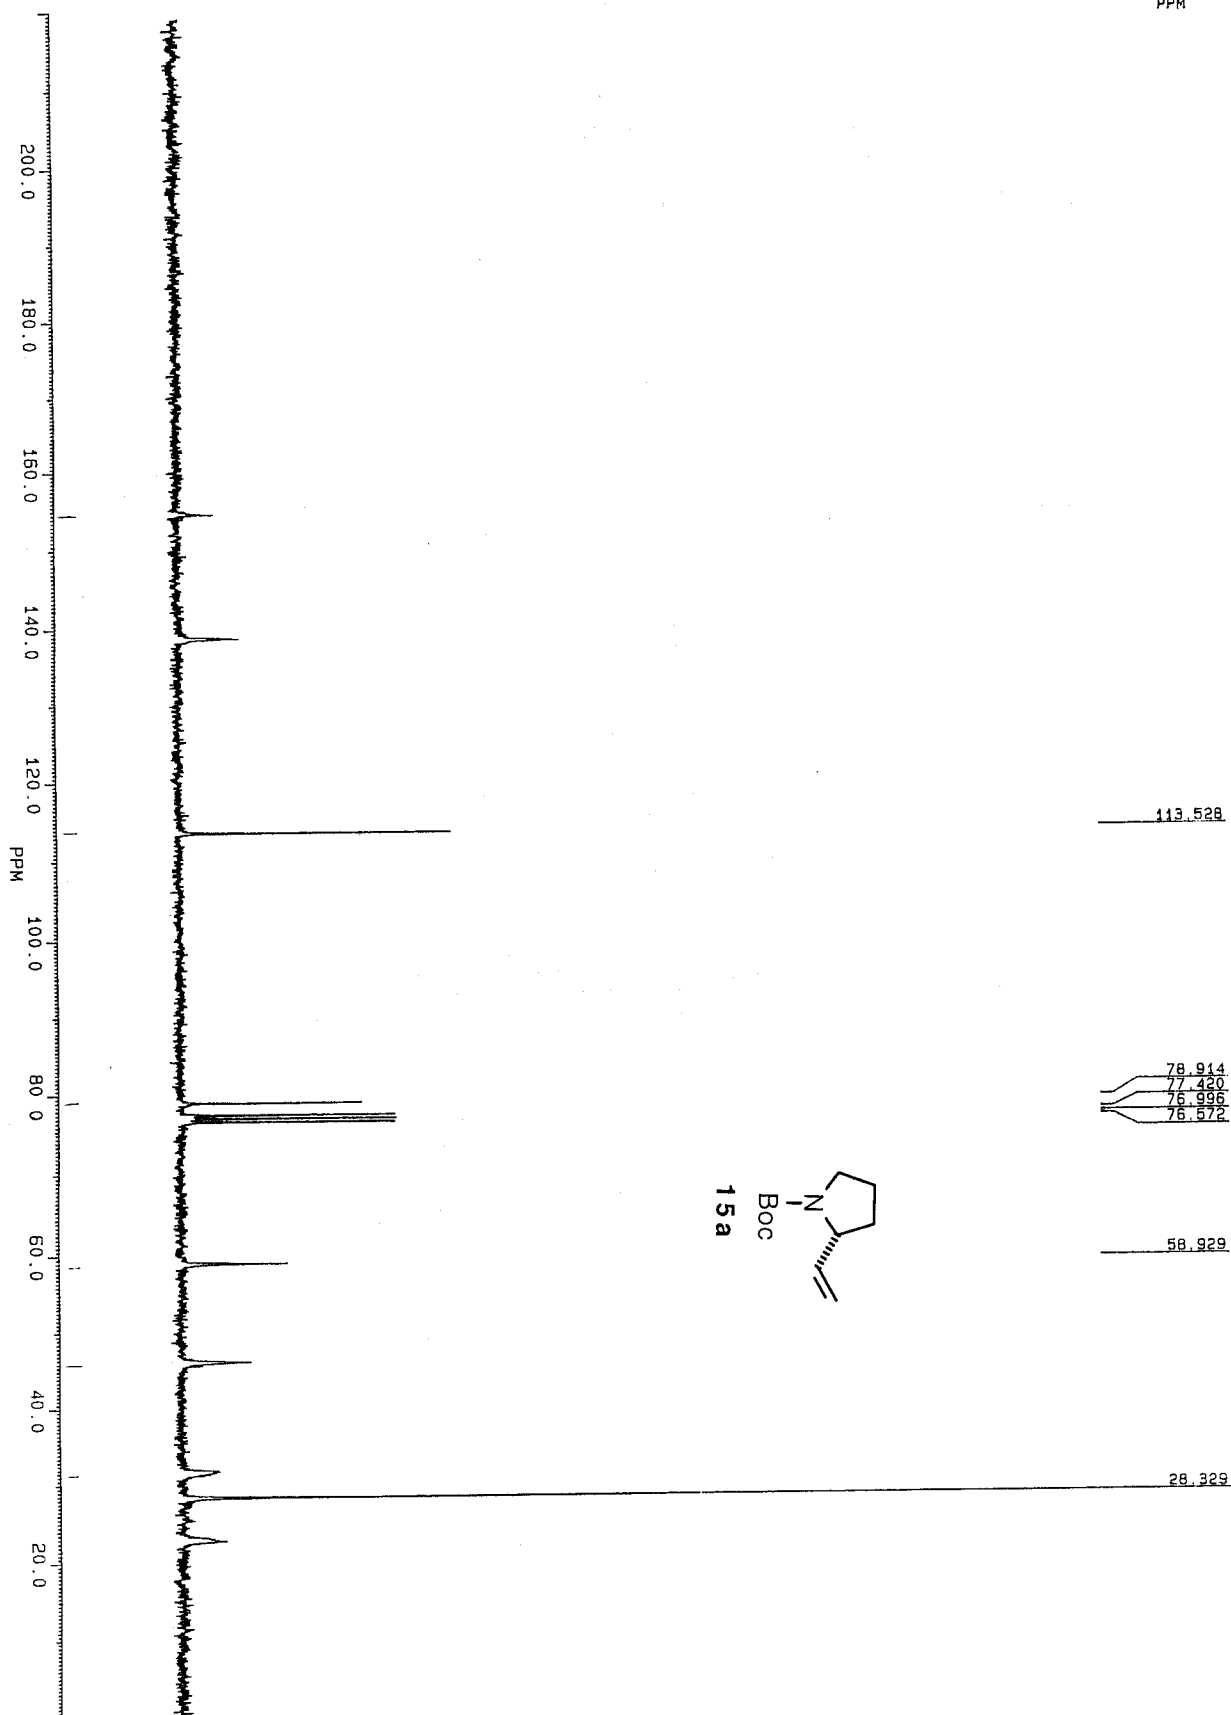

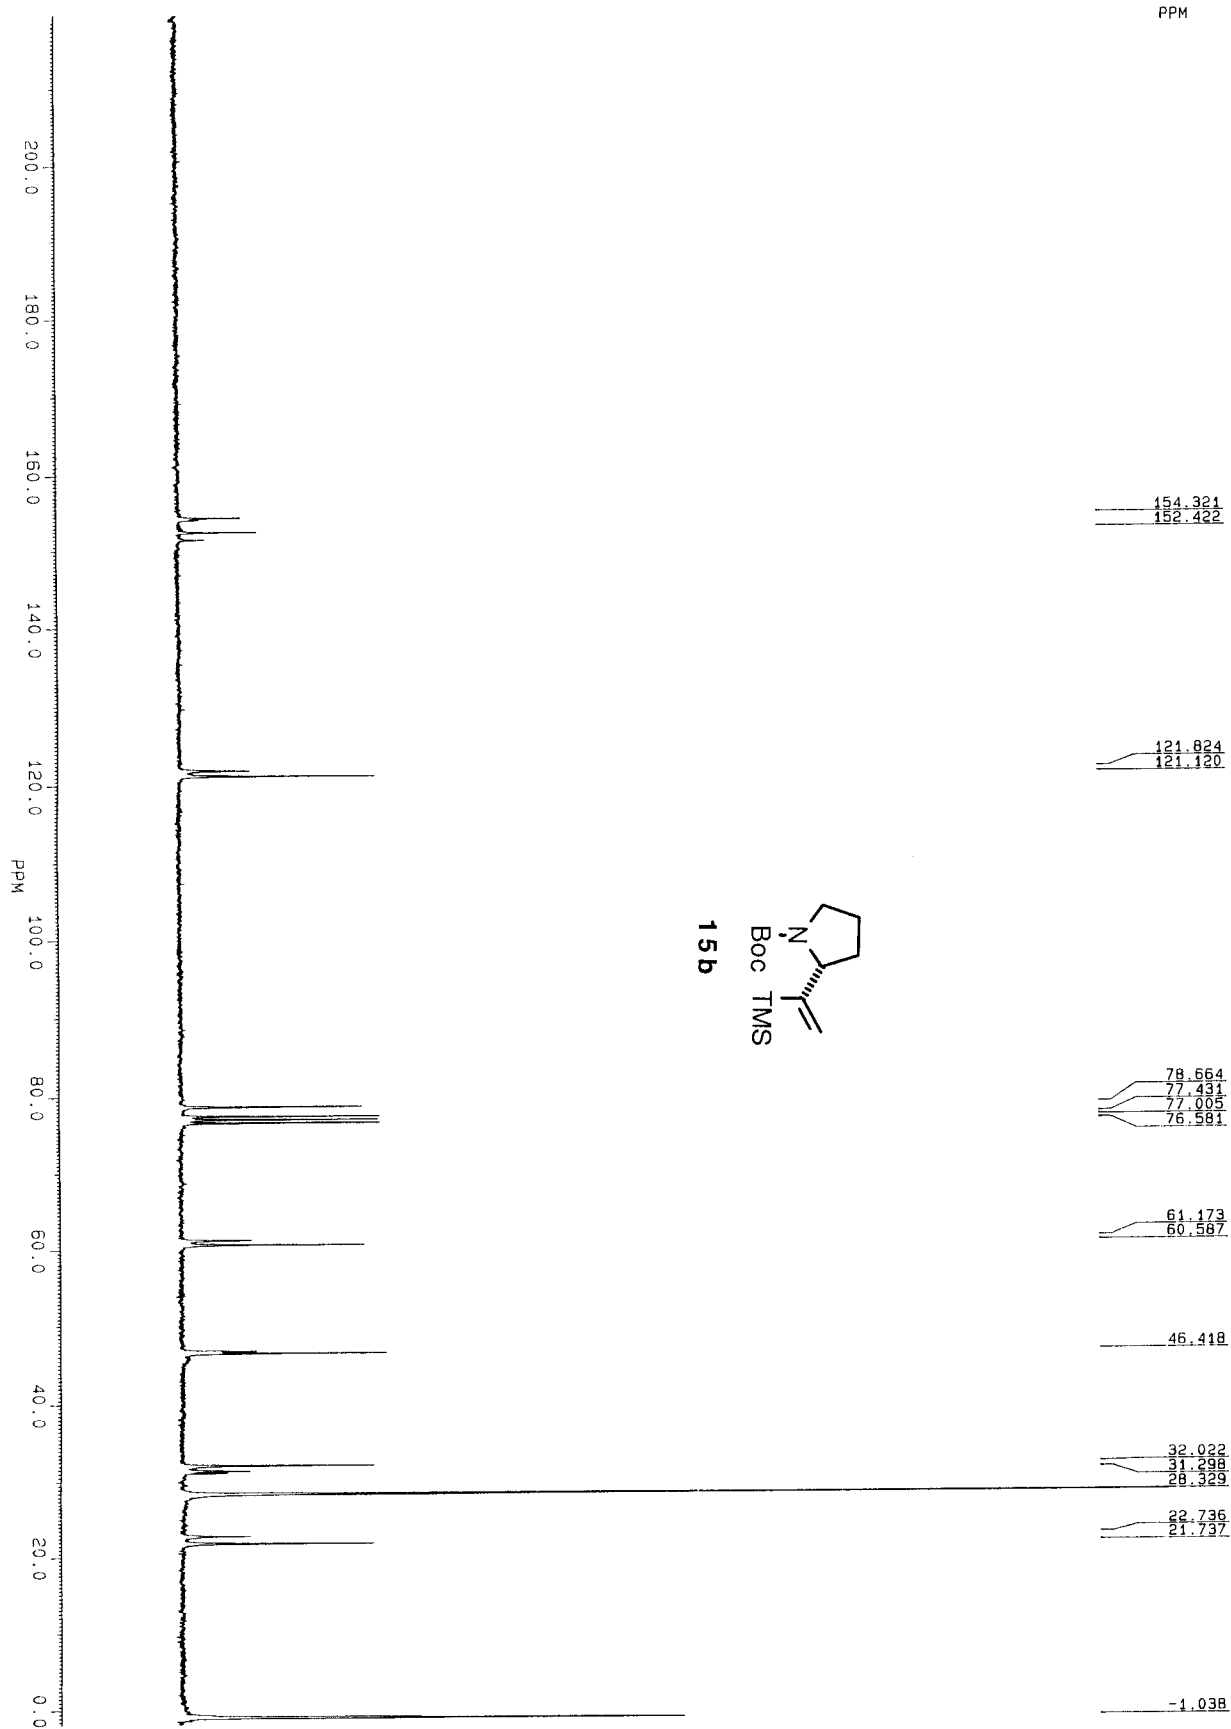



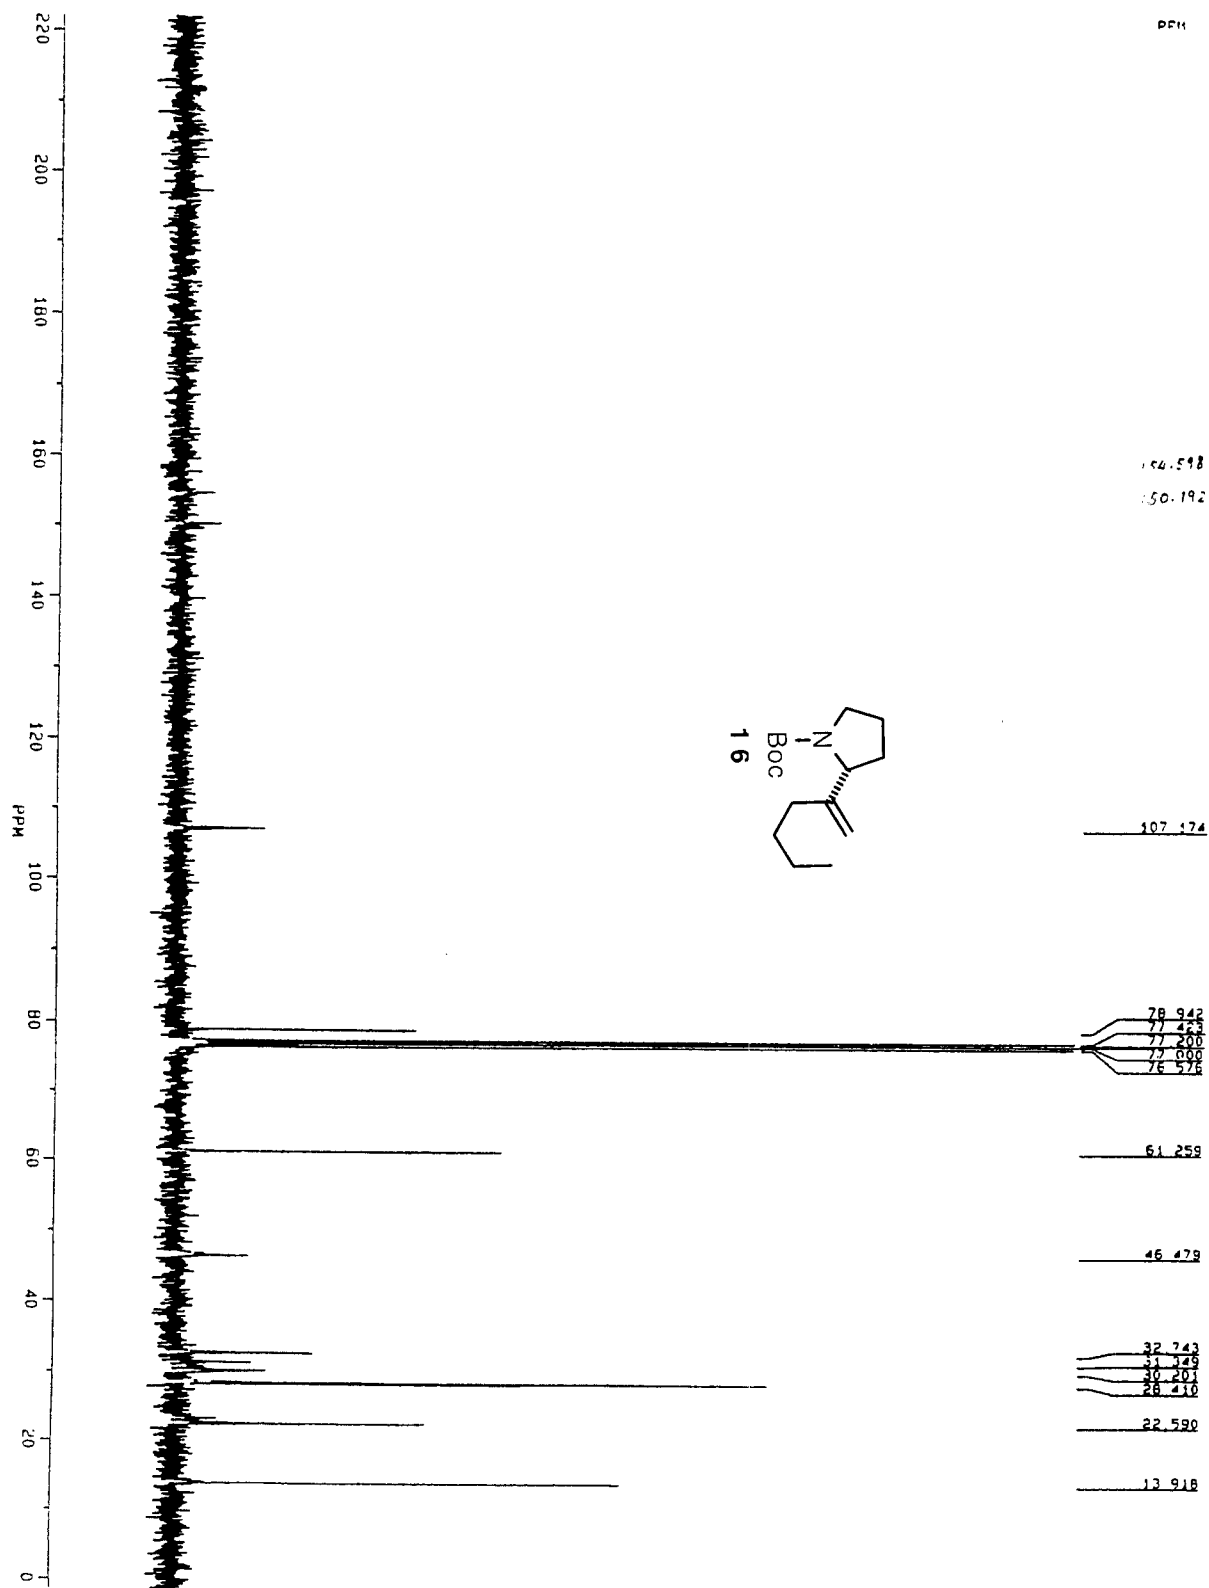

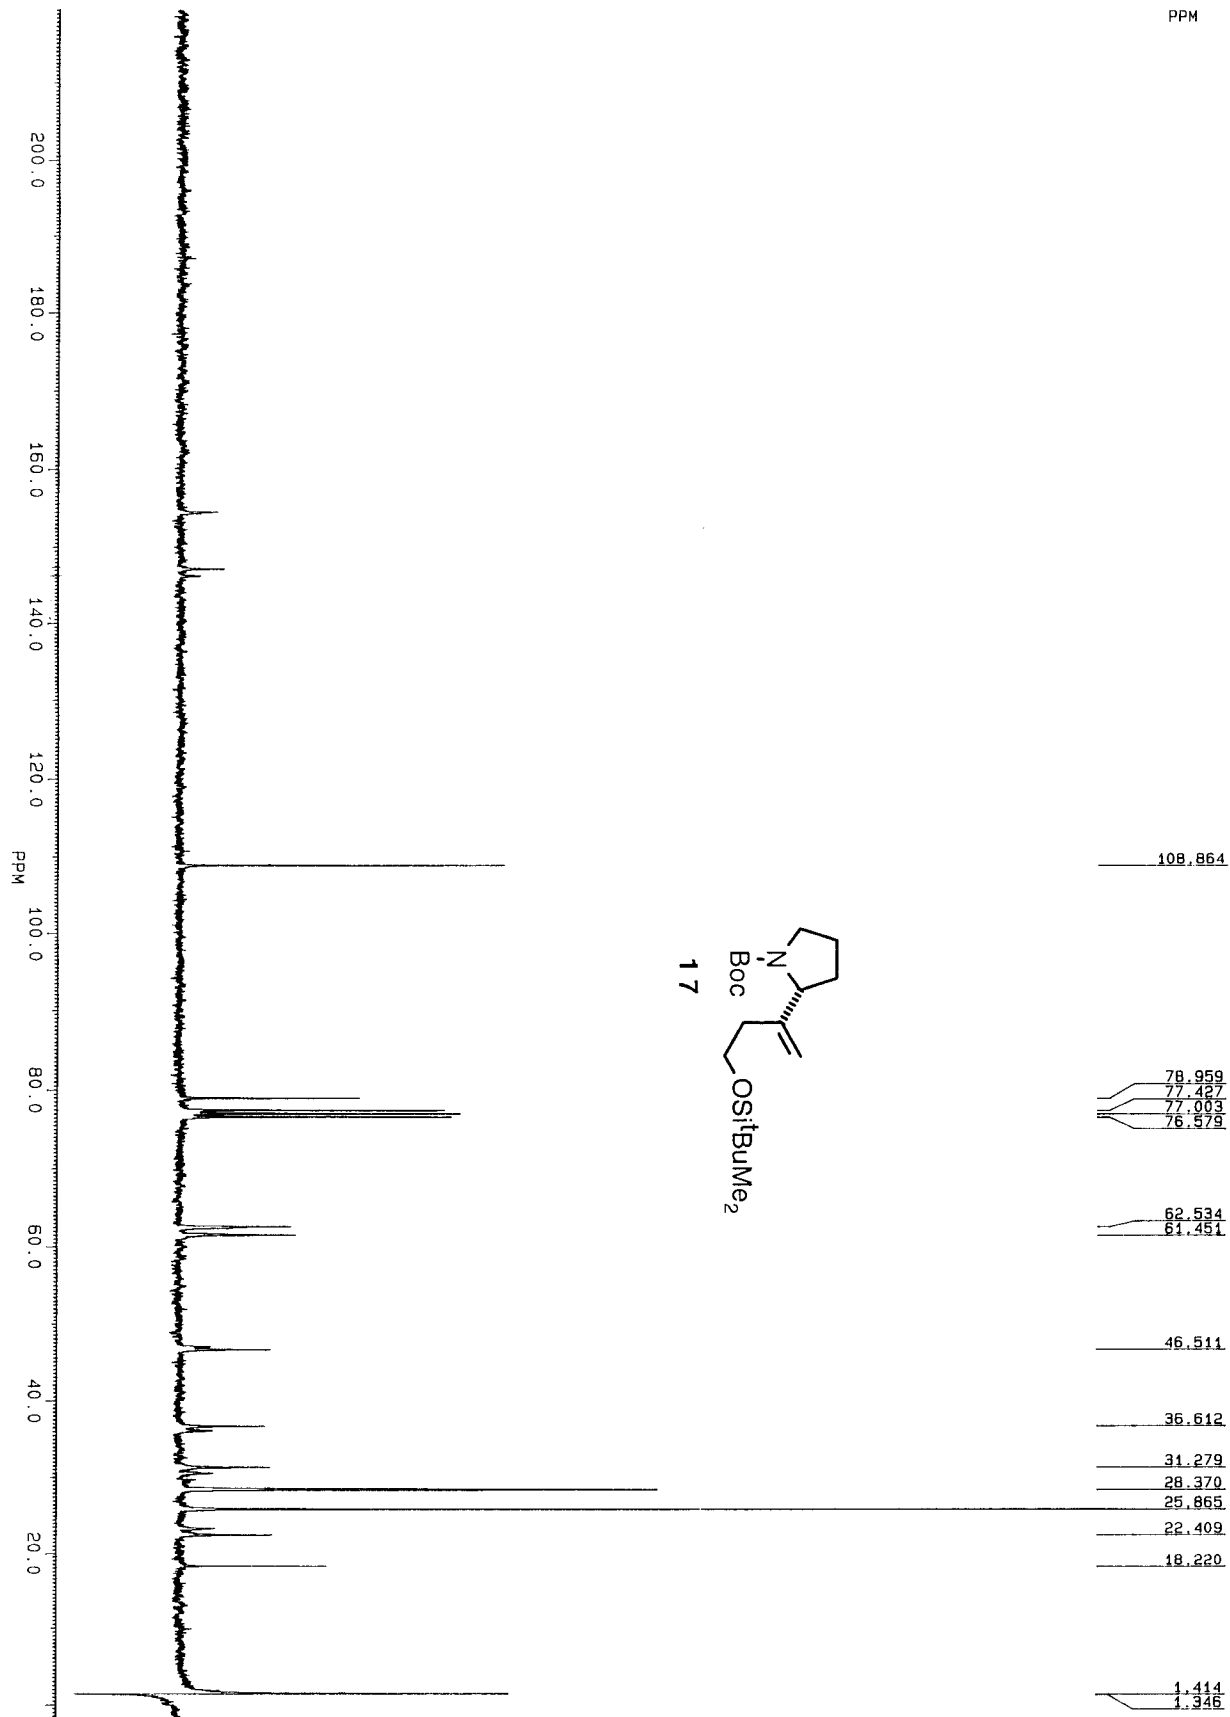

C K12-193

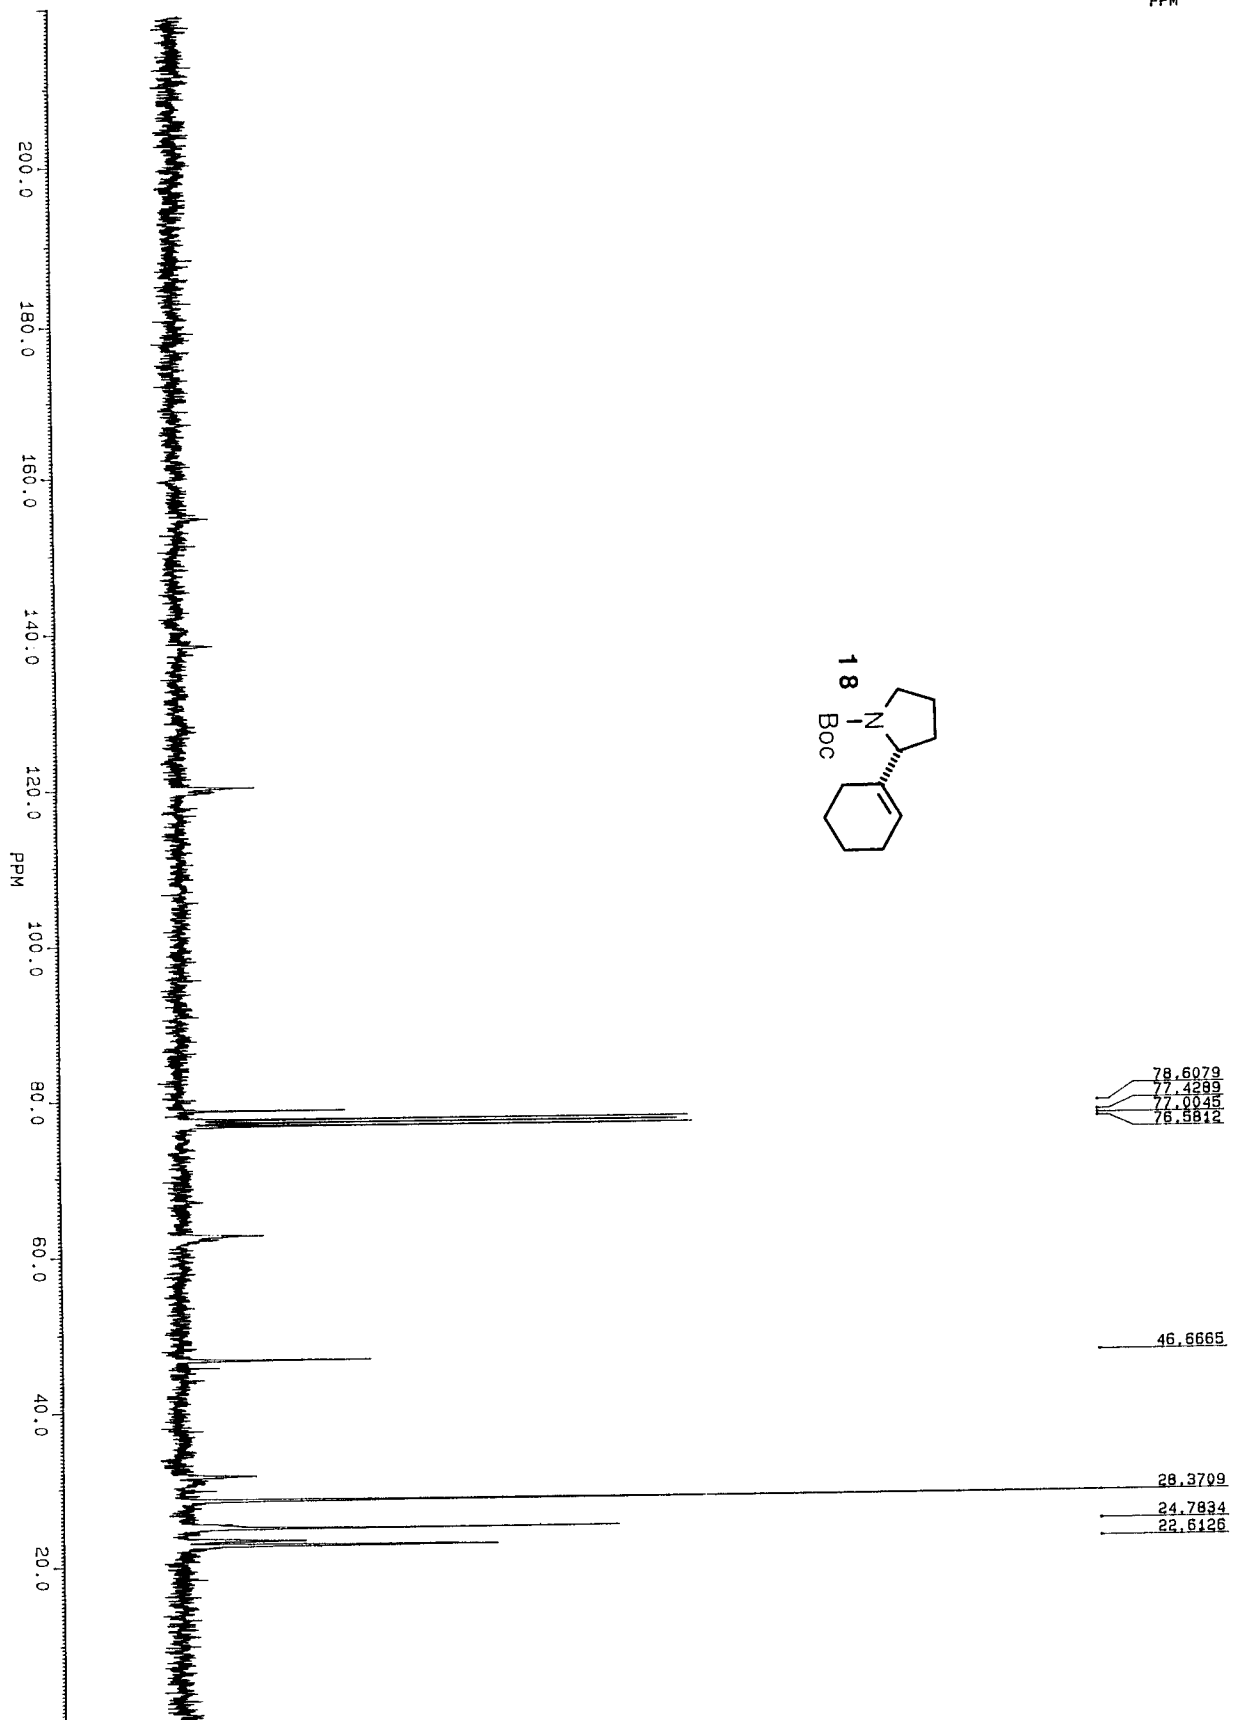

kshant1.5

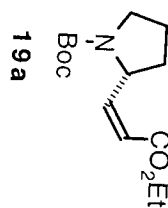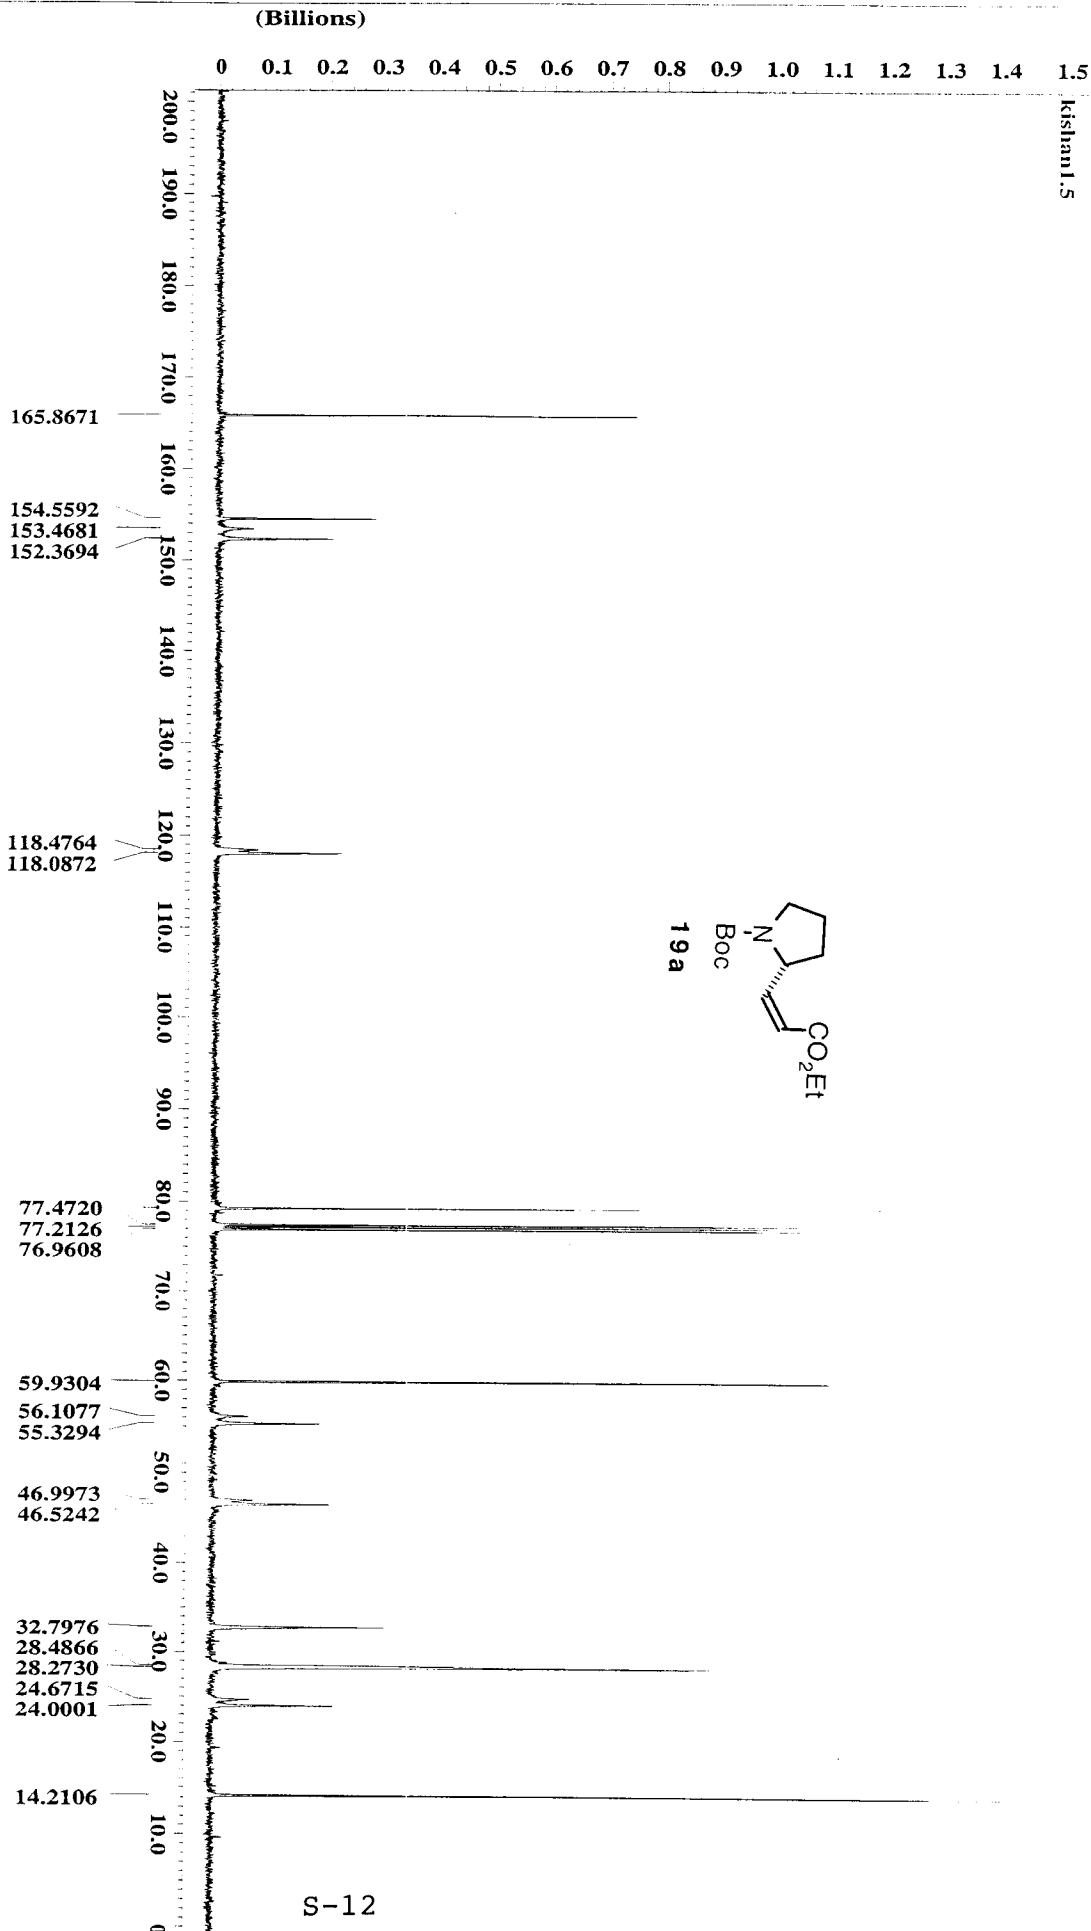

X : parts per Million : 13C

----- PROCESSING PARAMETERS -----

----- ACQUISITION PARAMETERS -----

File Name = kshant1.5

Author = Clemson NMR

Sample ID = 1

Content = single pulse decoupled

Creation Date = 11-DEC-2001 19:00:58

Revision Date = 11-DEC-2001 19:01:52

Spec Site = Eclipse+ 500

Spec Type = DEUTRA\_NMR

Data Format = 1D COMPLEX

Dimensions = 13C

Dim Title = 13C

Dim Size = 32768

Dim Units = [ppm]

13C = 13C

X domain = 1001(ppm)

X offset = 1001(ppm)

X\_freq = 125.77787547 [MHz]

X\_sweep = 31.44654088 [kHz]

X\_points = 32768

X\_resolution = 0.95970156 [Hz]

X\_prescans = 4

Scans = 267

Recvr\_gain = 27

Solvent = CHLOROFORM-D

Solvent\_get = 14 [Hz]

Temp\_get = 22.2 [dC]

Experiment = single\_pulse\_dec

Relaxation\_delay = 2 [s]

dc\_balance

seep : 1.5 [Hz]

fft : 1

machinephase

ppm

dc\_correct

JEOL

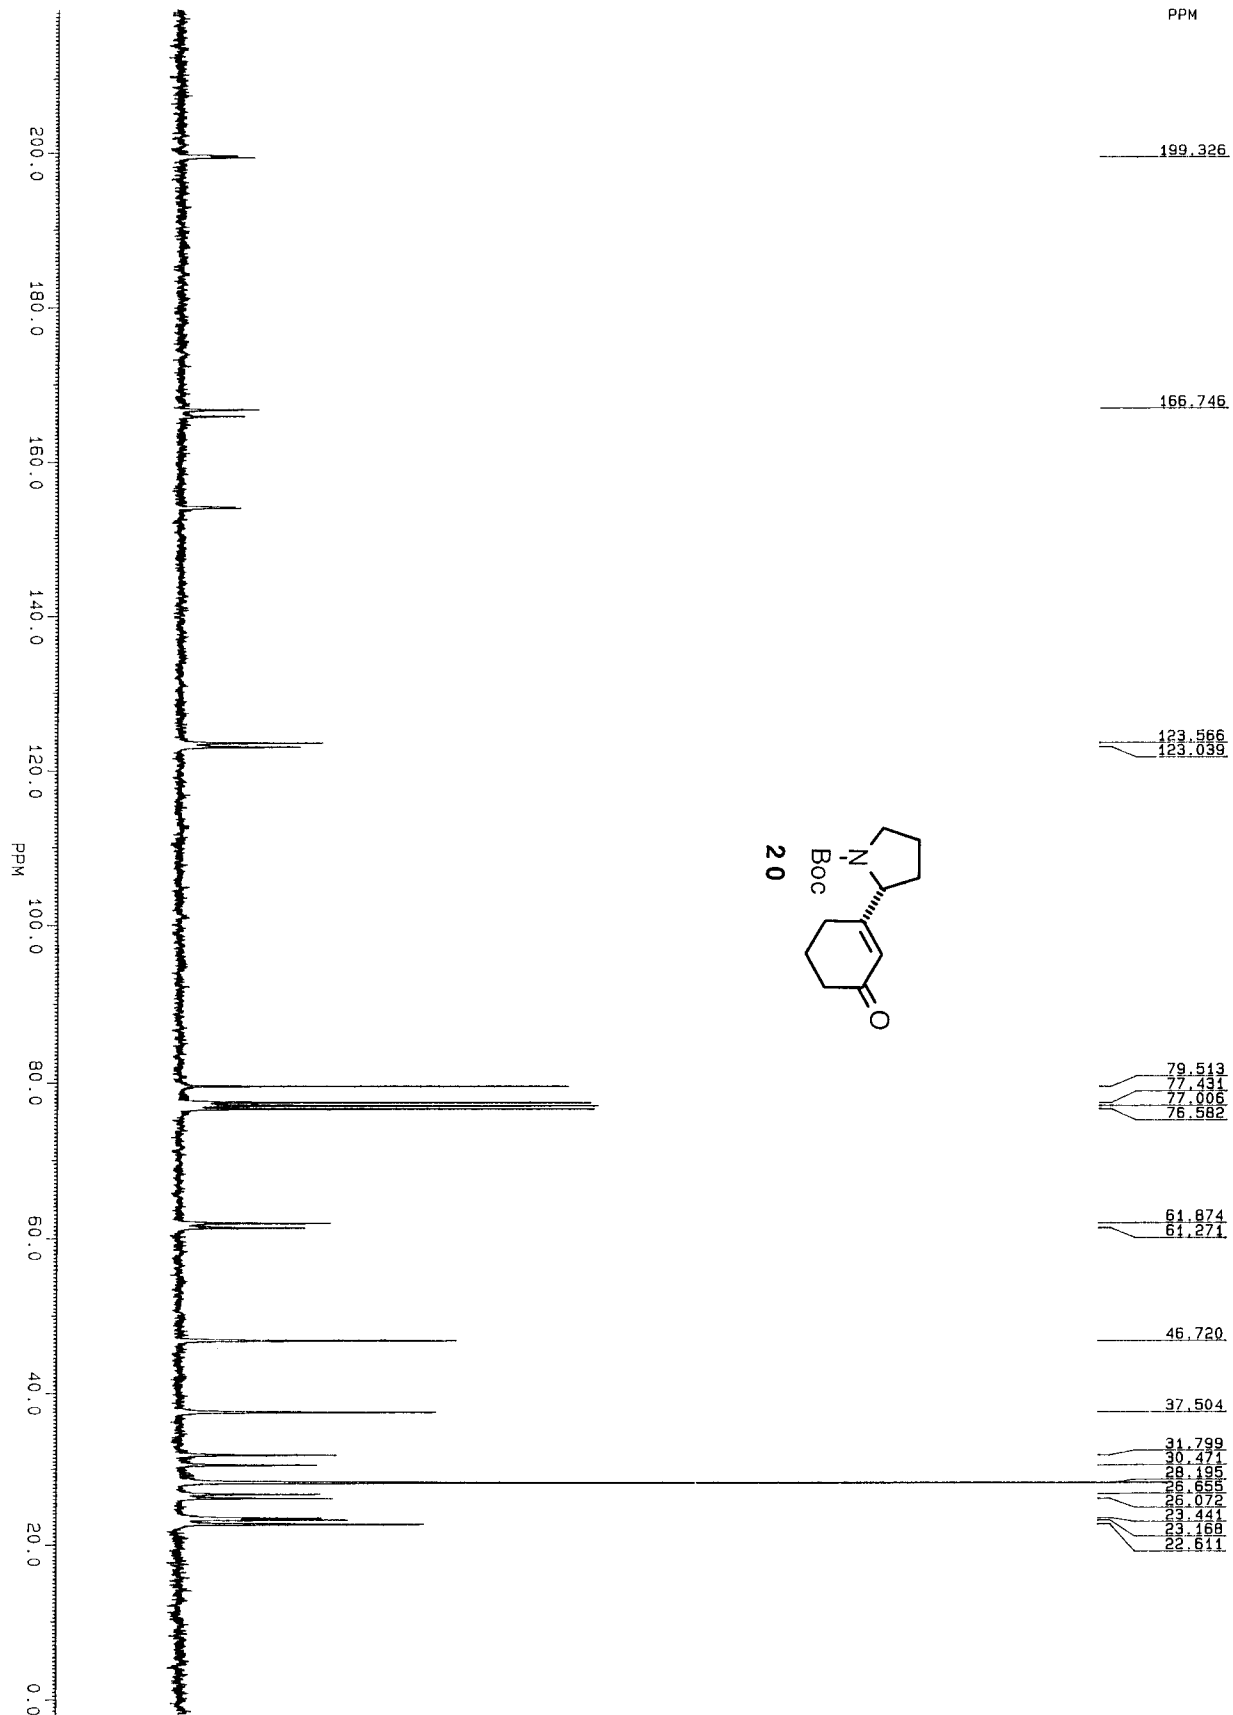

CR-151

200.0 180.0 160.0 140.0 120.0 100.0 80.0 60.0 40.0 20.0  
PPM

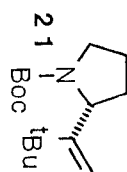

77.4173  
76.9938  
76.5703

57.7617

46.9274

30.4555  
28.5922

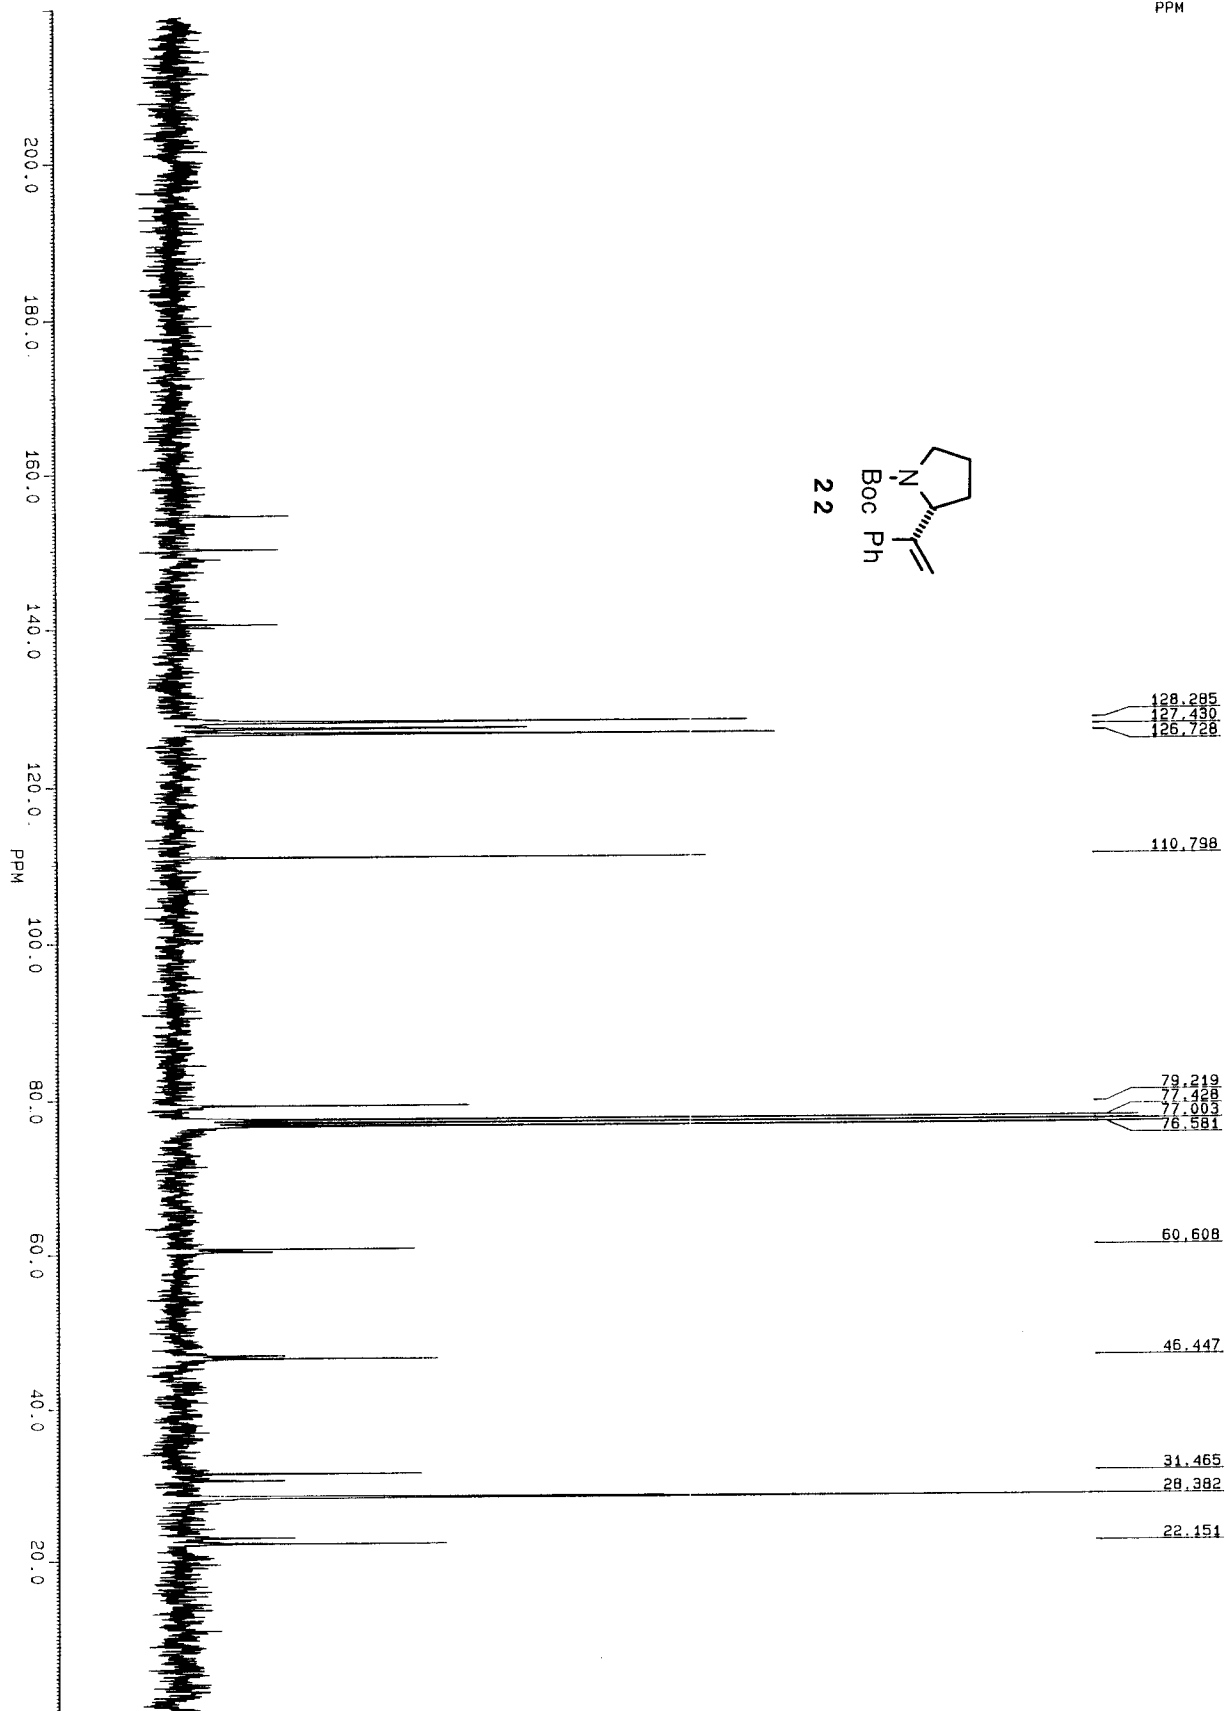

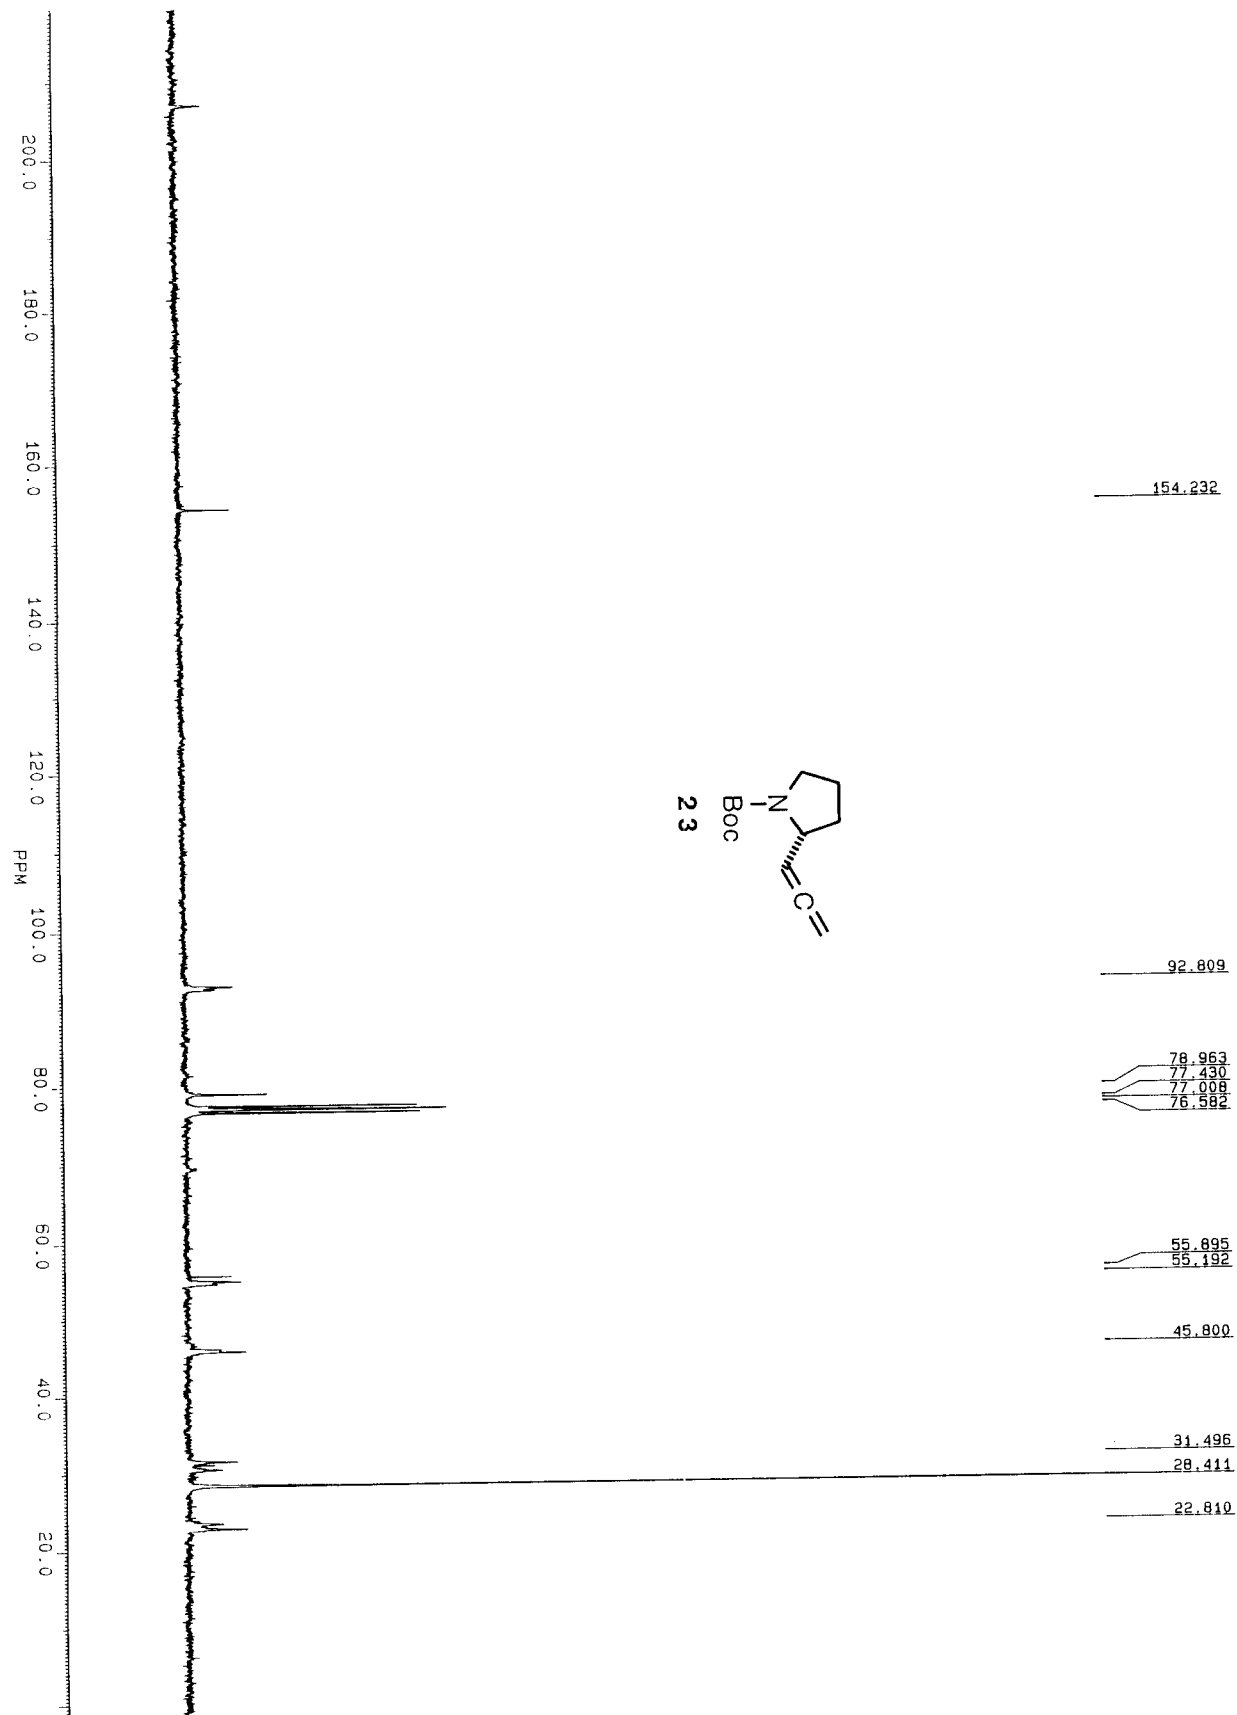



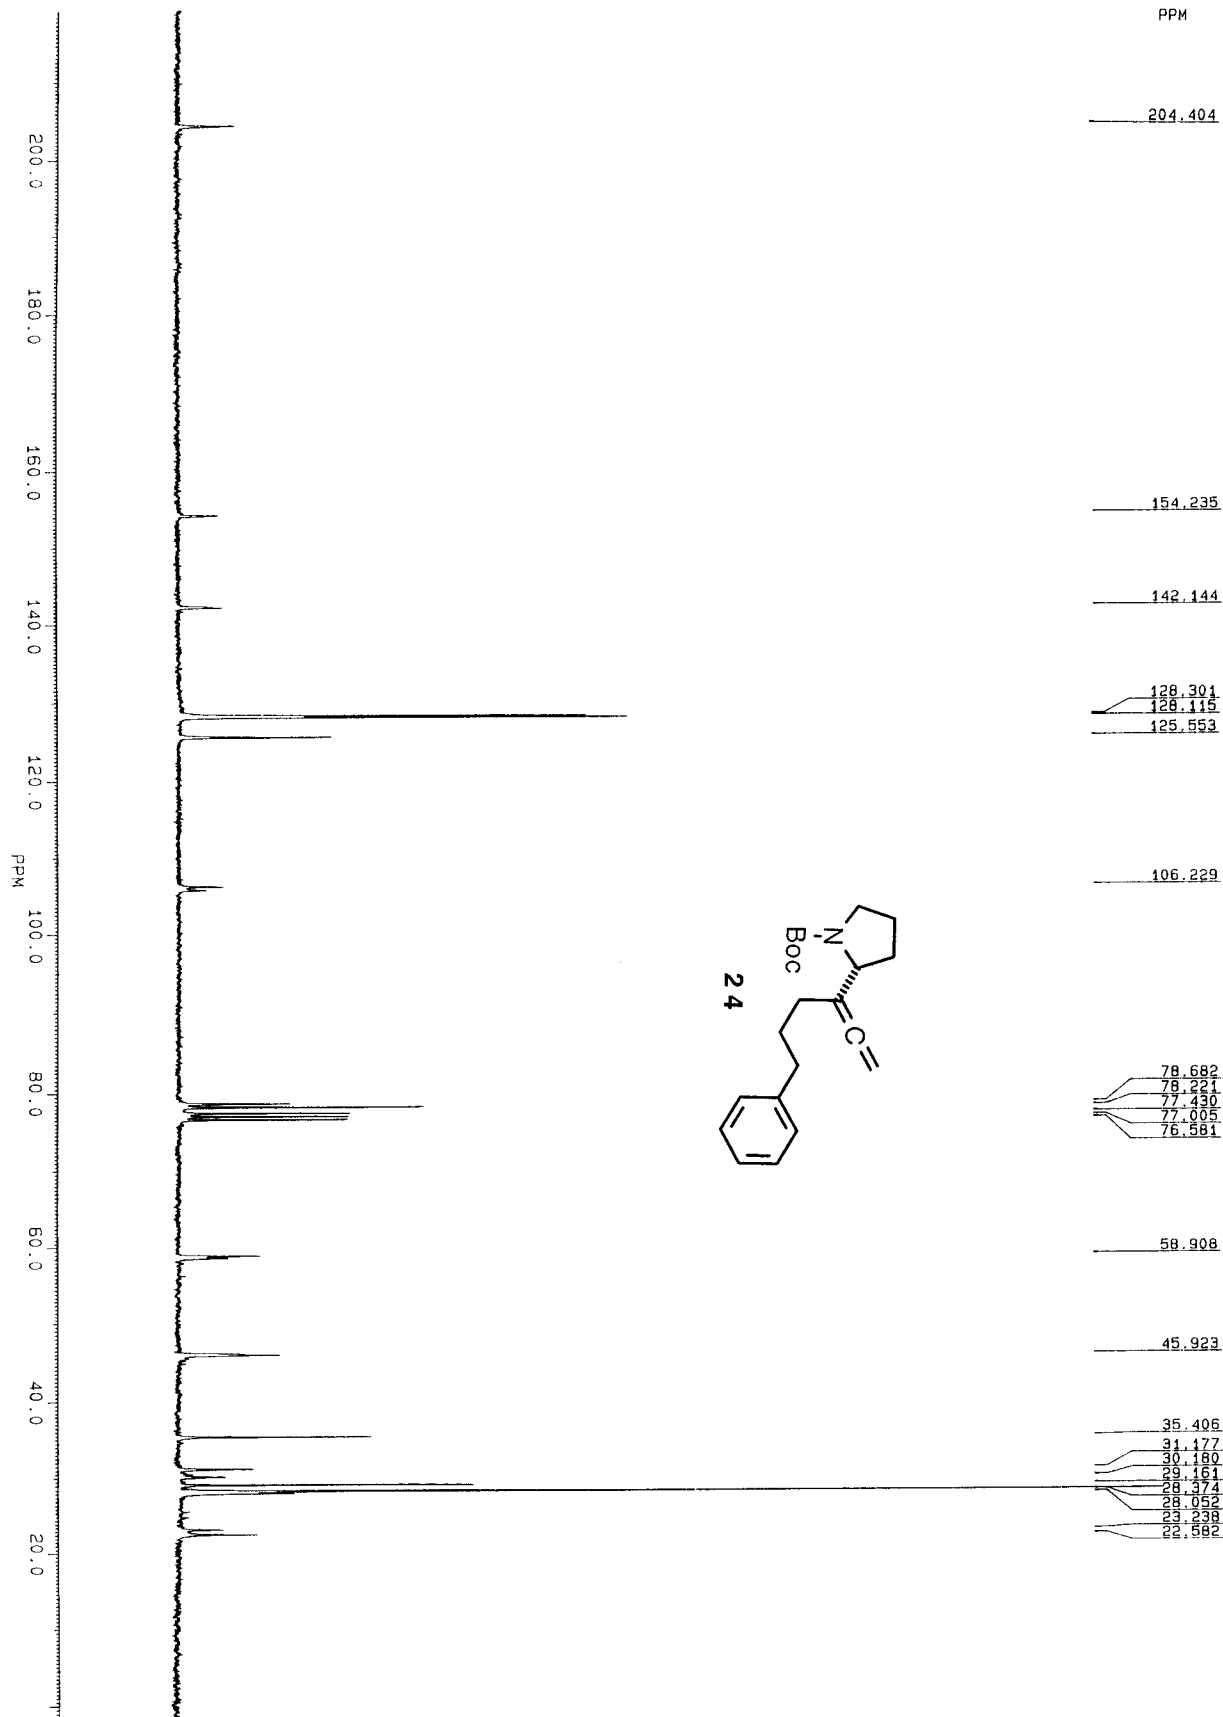

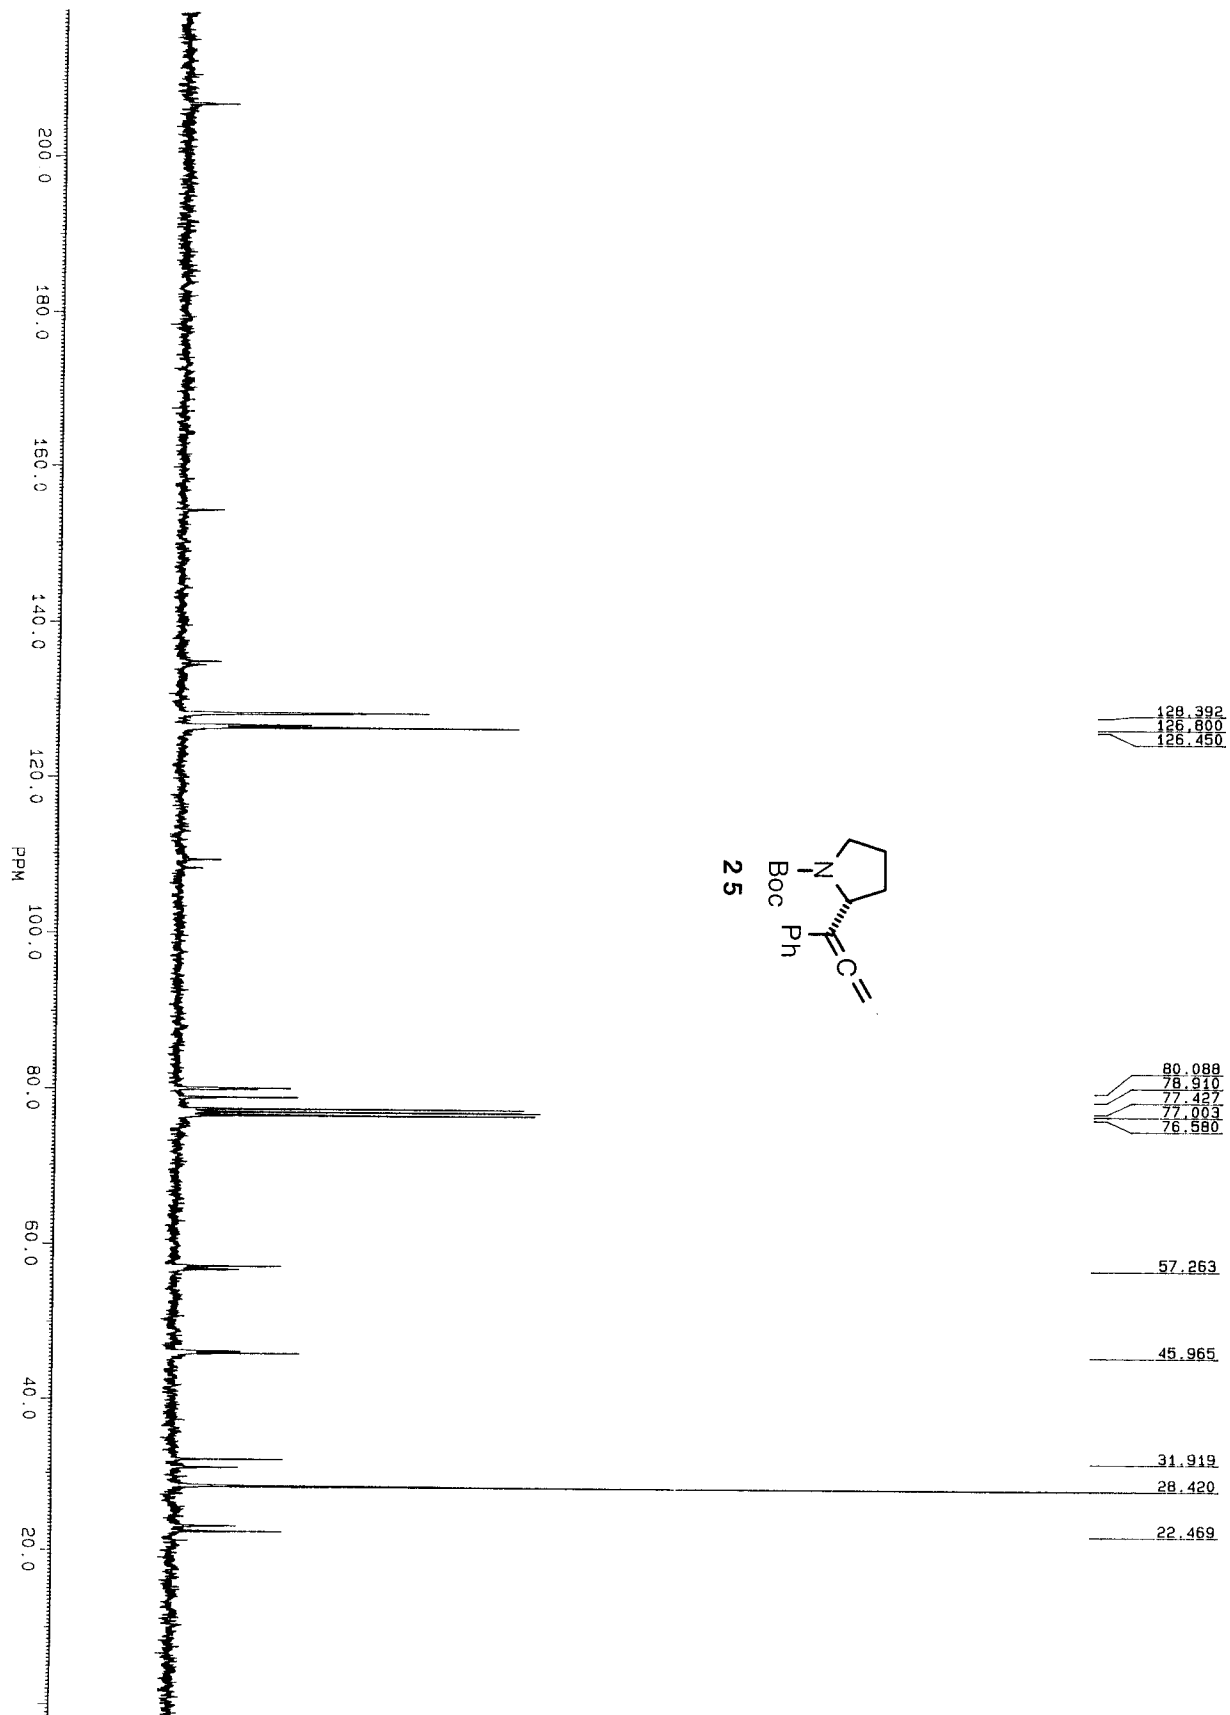

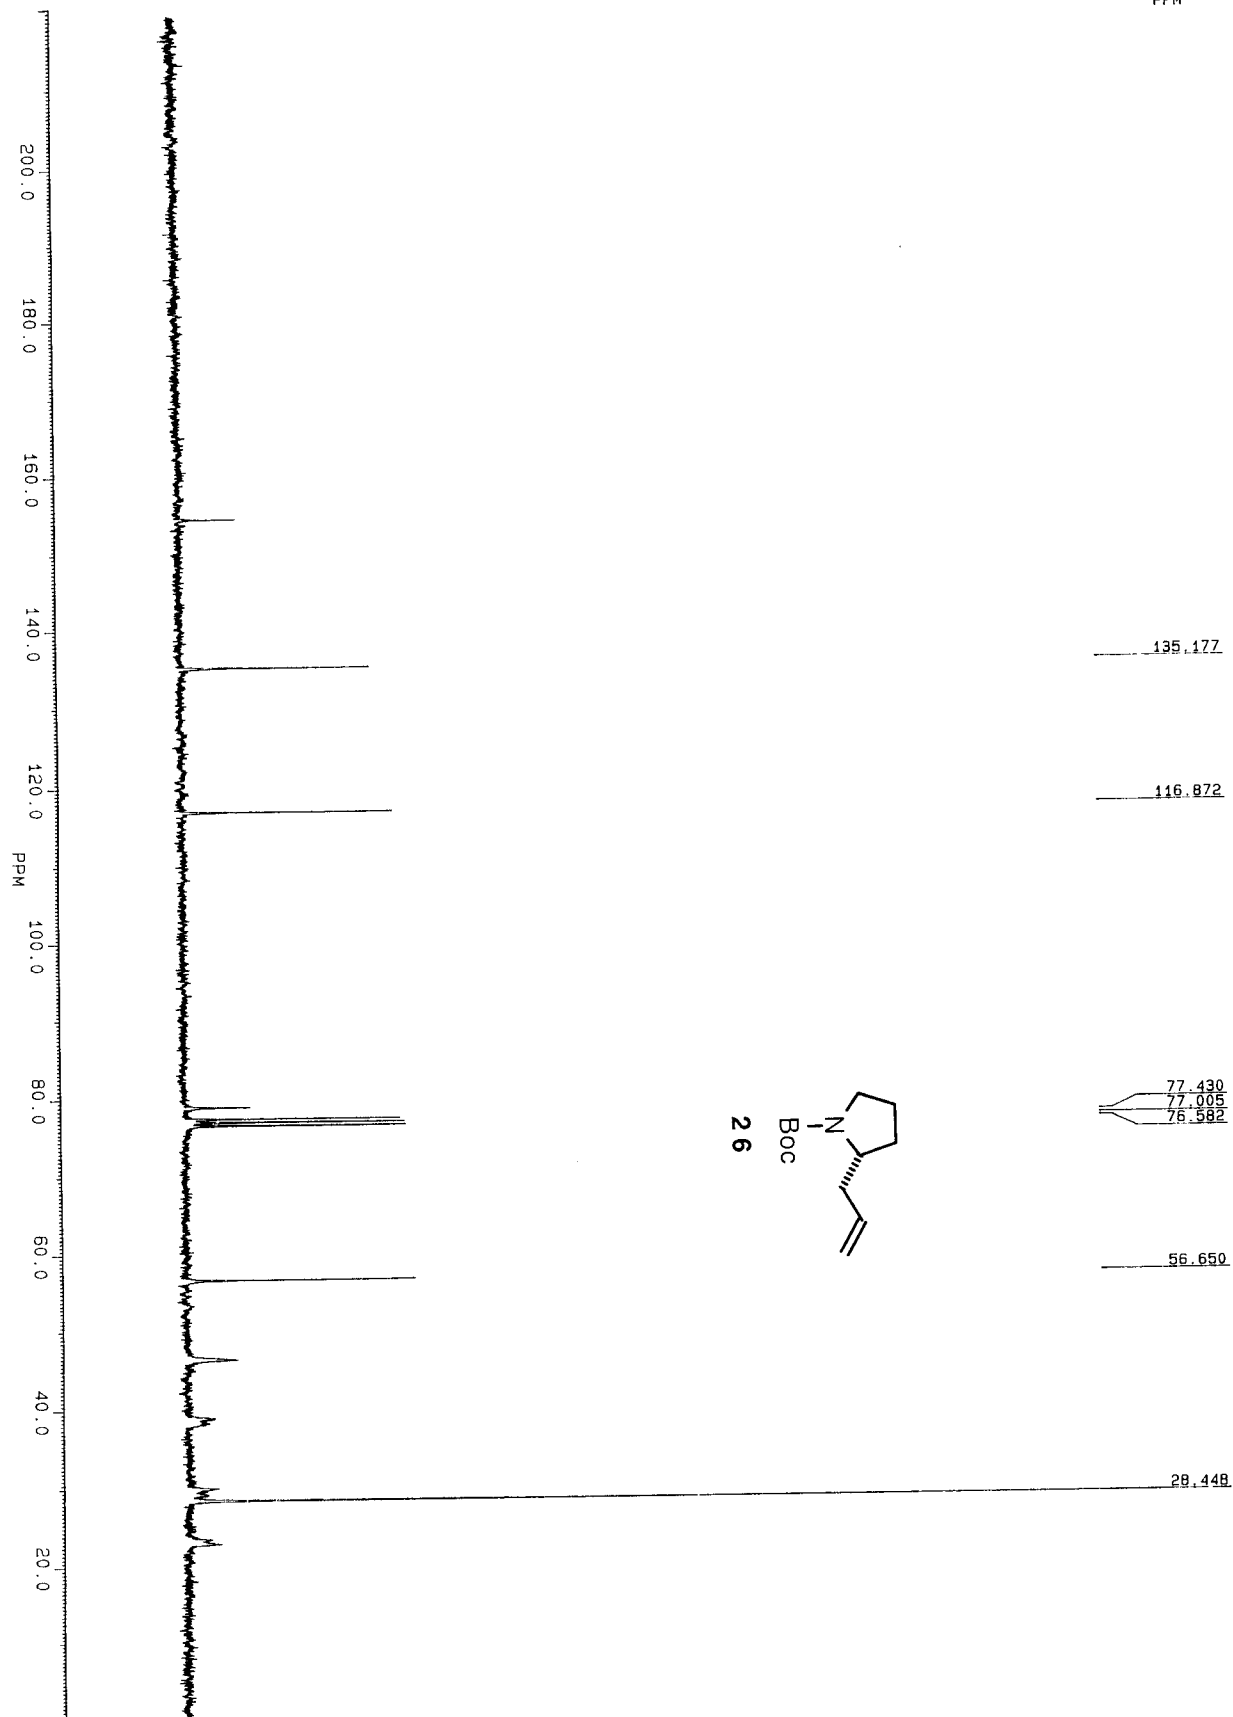

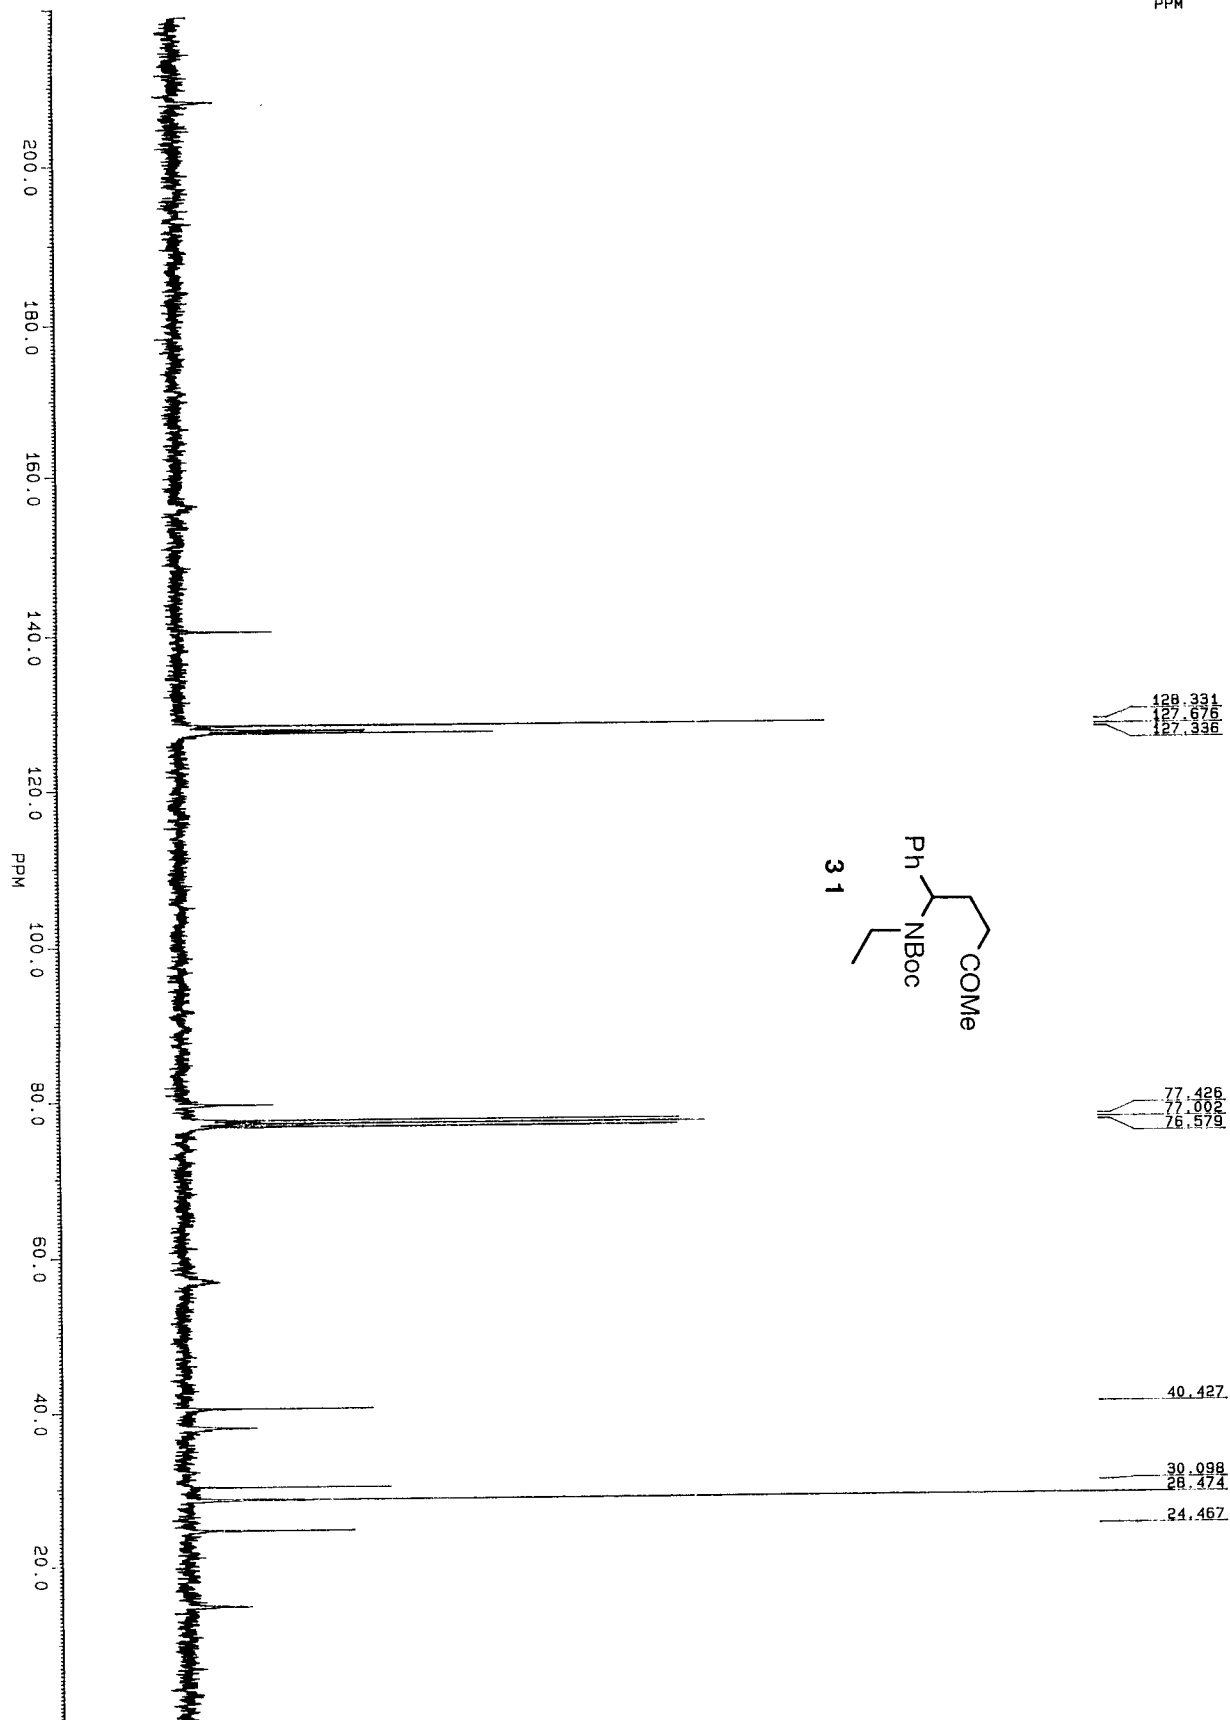

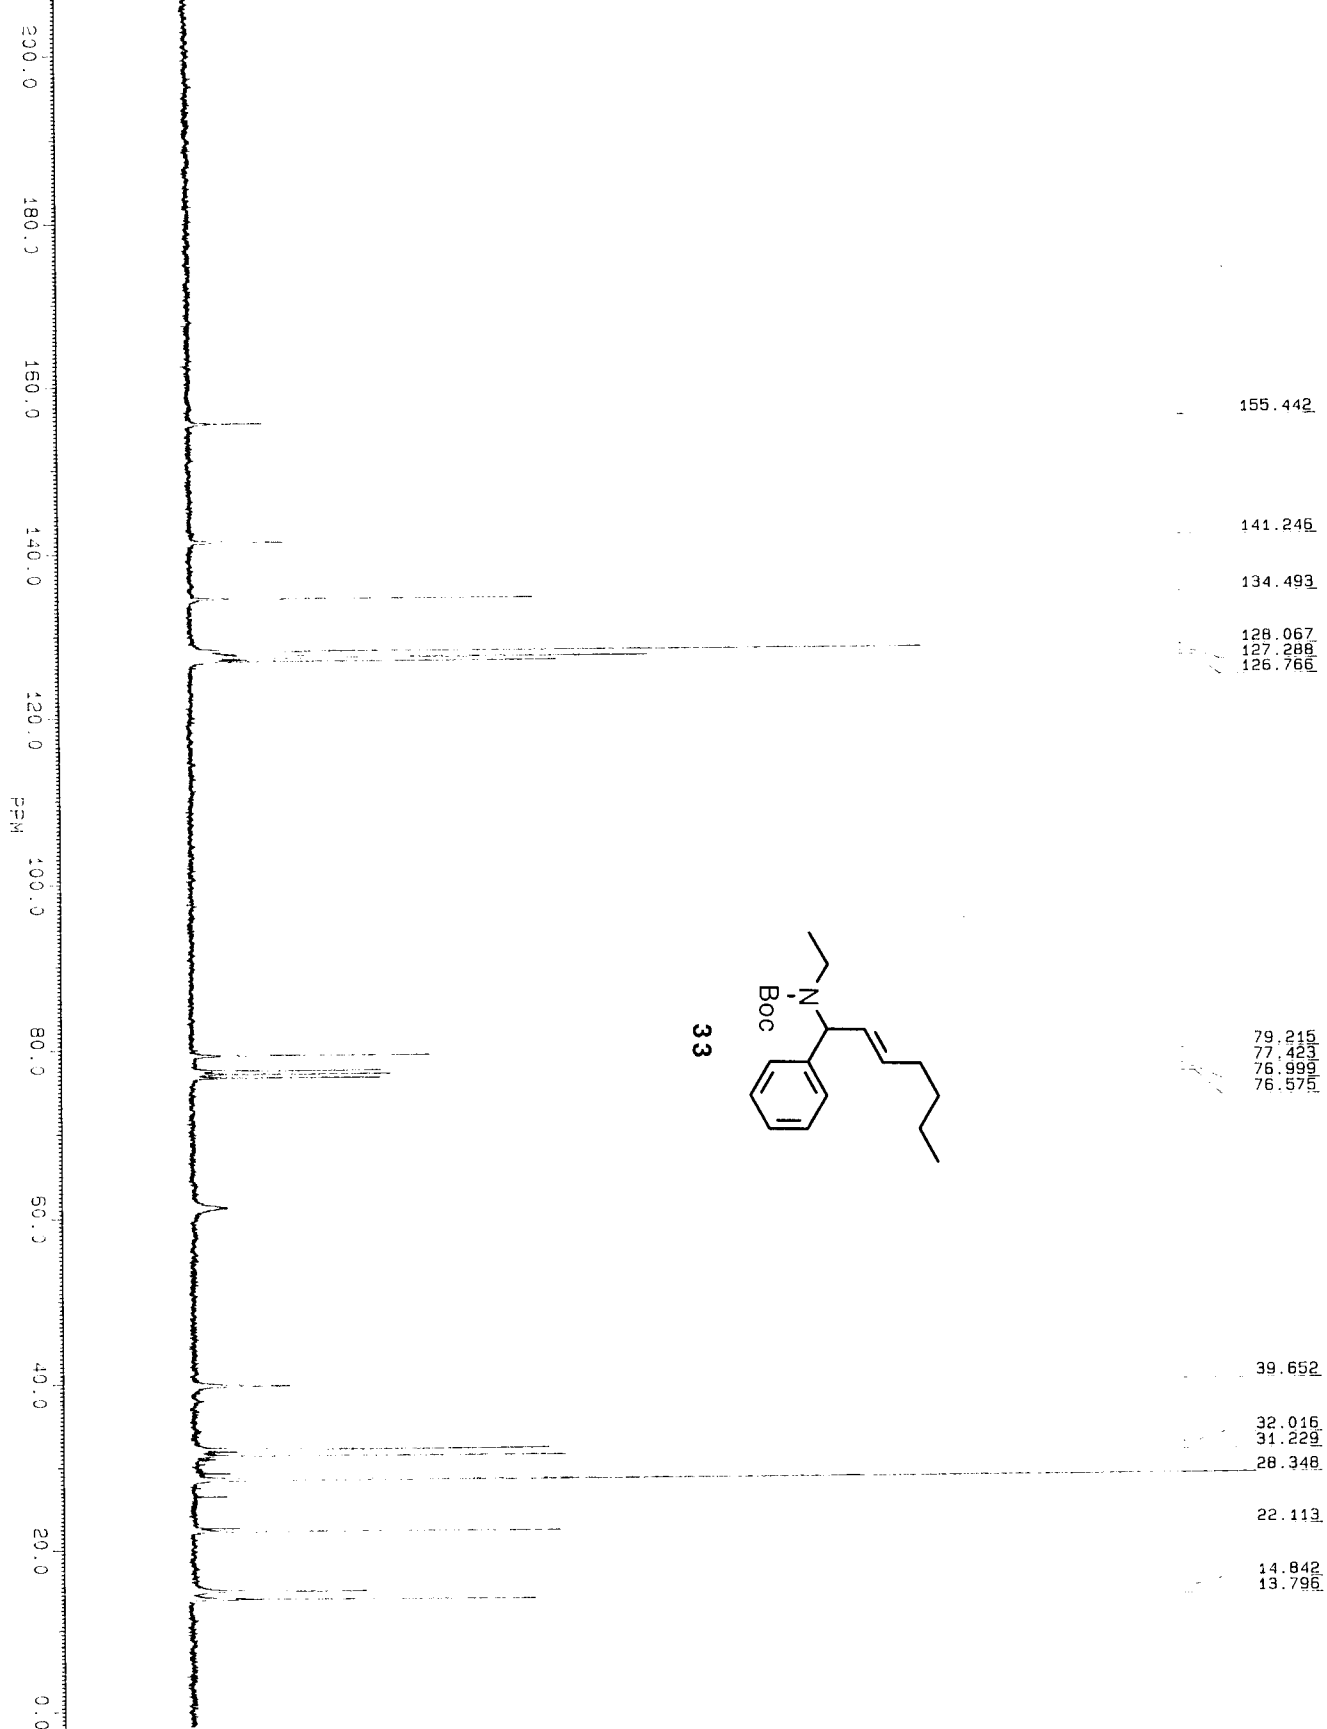

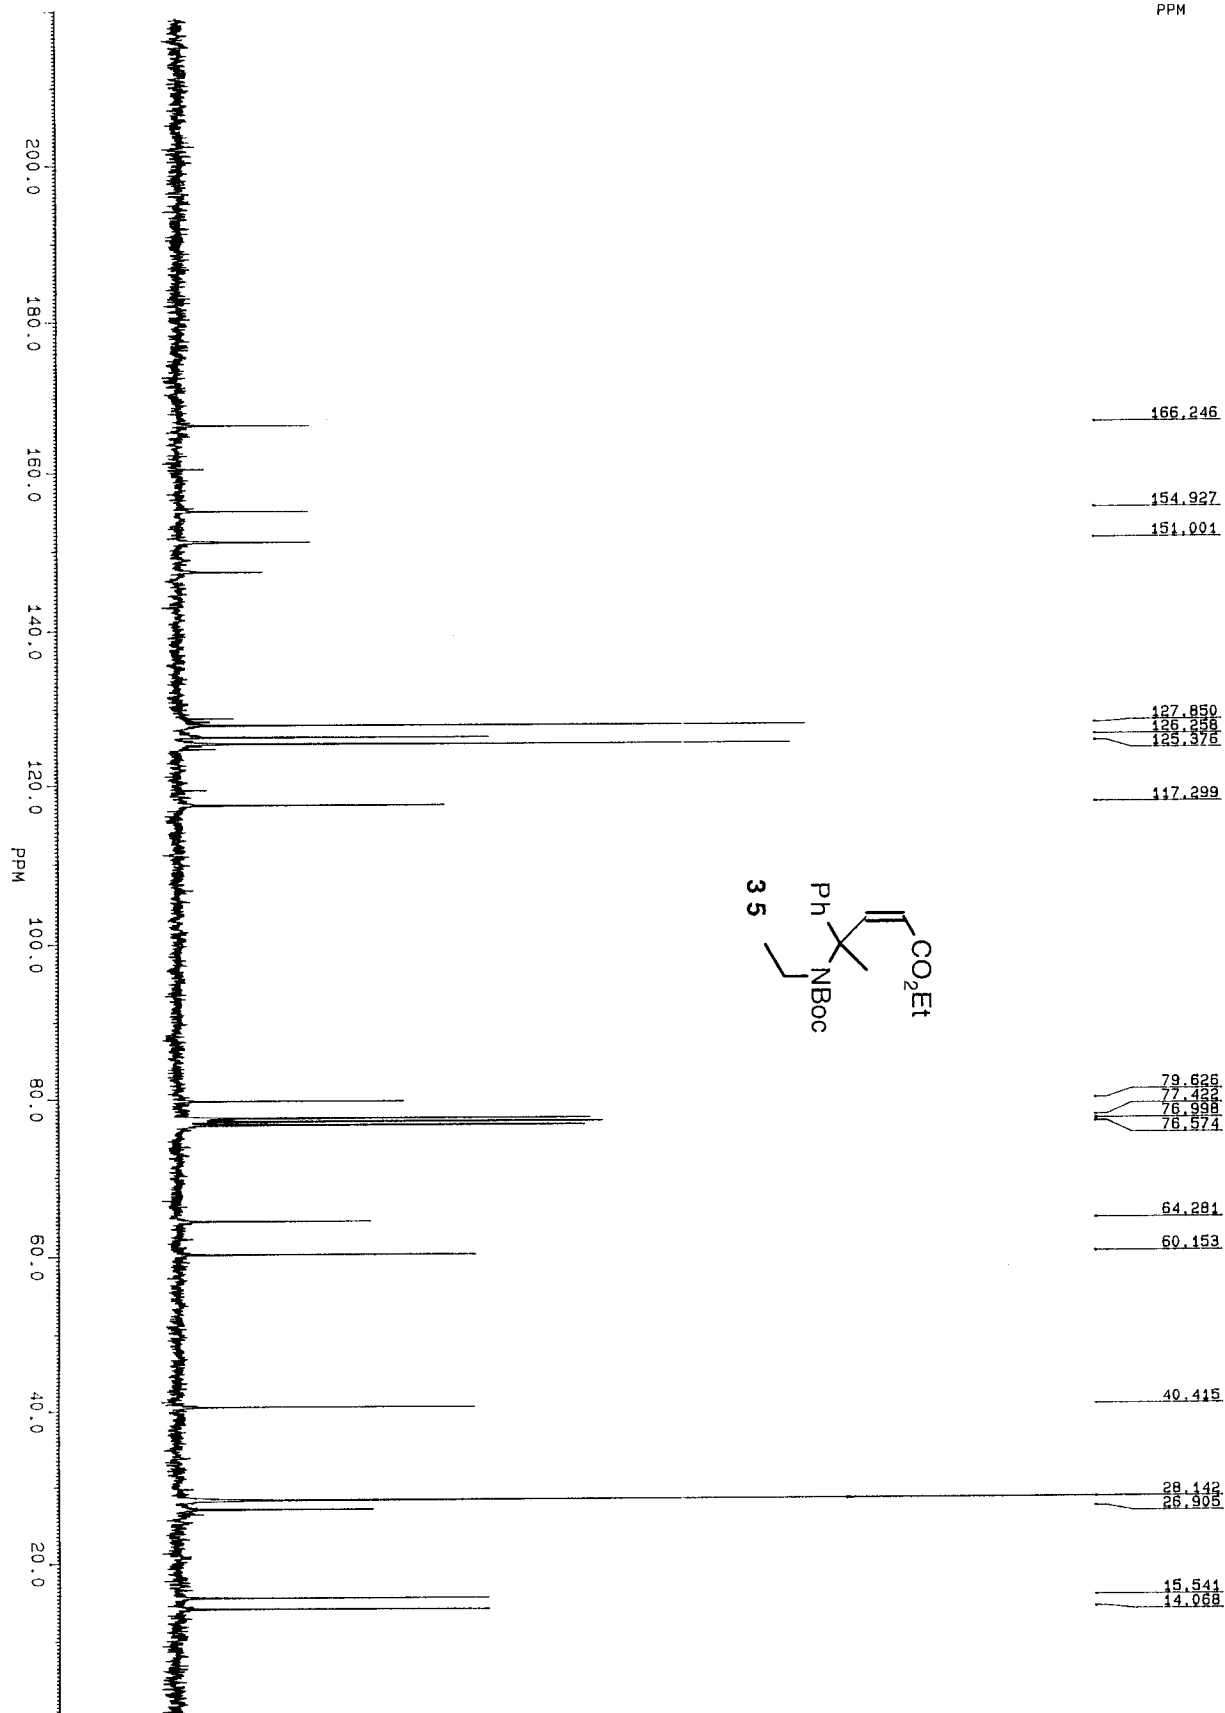

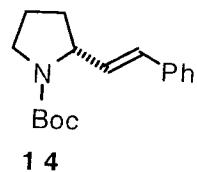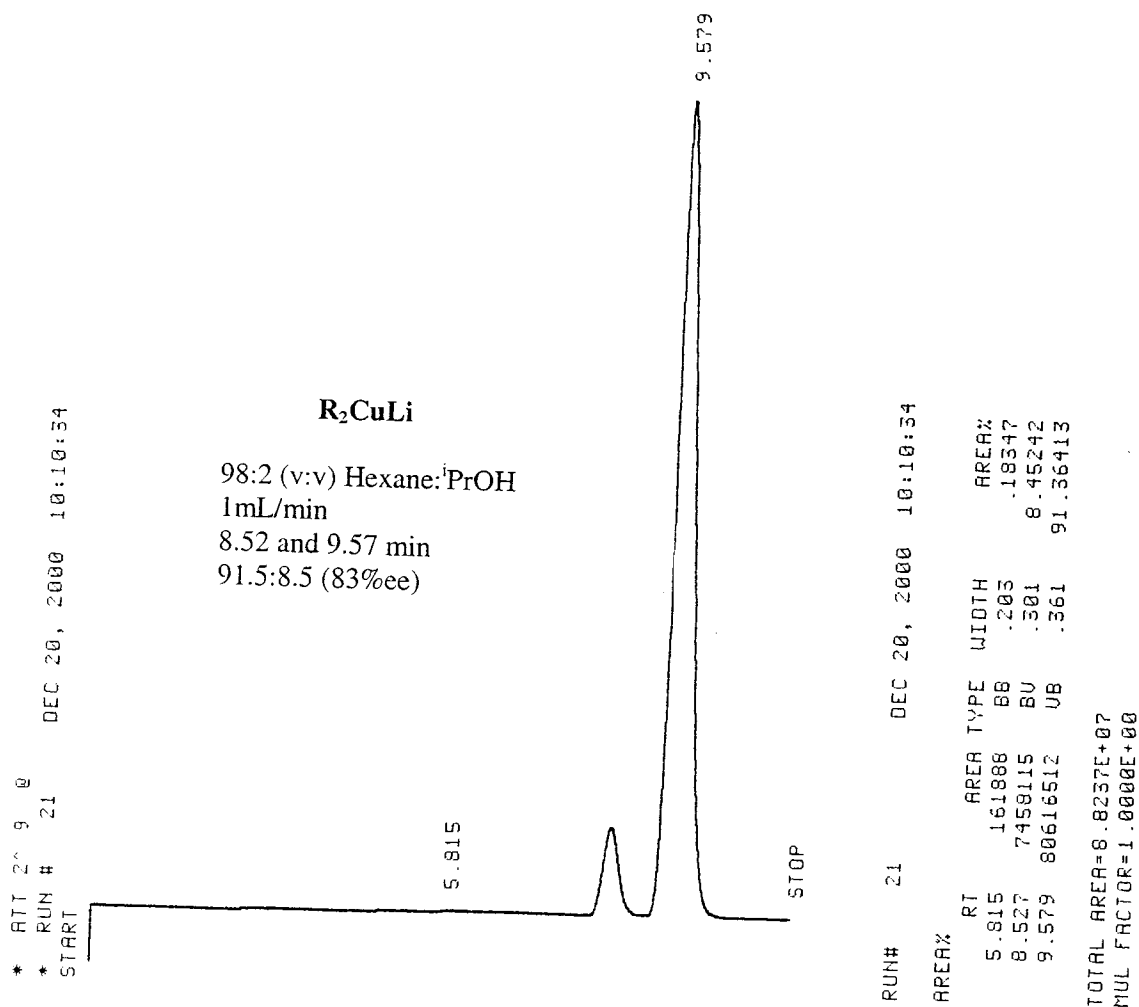

$R_2CuLi$

Et<sub>2</sub>O:THF = 1:1  
99.8:0.2 (v:v) Hexane:PrOH  
0.6mL/min  
17.65 and 19.62 min  
38:12 (88.6%ee)

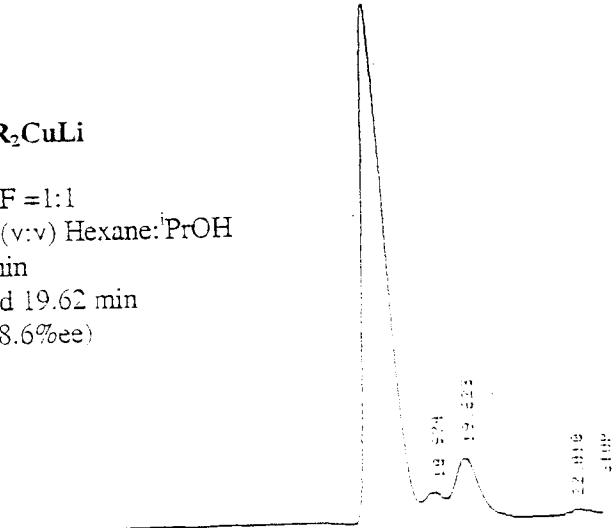

| AREA% | RT    | AREA   | TYPE    | WIDTH   |
|-------|-------|--------|---------|---------|
| 88.6  | 17.65 | 21717  | PU      | 0.095   |
| 11.4  | 19.62 | 19516  | BU      | 0.241   |
|       |       | 17357  | PU      | 0.236   |
|       |       | 125715 | PU      | 0.485   |
|       |       | 125715 | PU      | 0.485   |
|       |       | 373243 | PU      | 0.563   |
|       |       | 75548  | PU      | 0.170   |
|       |       | 1014   | AREA    | 4157.07 |
|       |       | 100    | PERCENT | 100.00  |

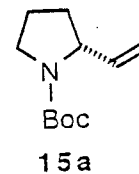

$R_2CuLi$

Et<sub>2</sub>O:THF = 1:2  
99.8:0.2 (v:v) Hexane:PrOH  
0.6mL/min  
17.43 and 18.59 min  
72.9:27.1 (45.8%ee)

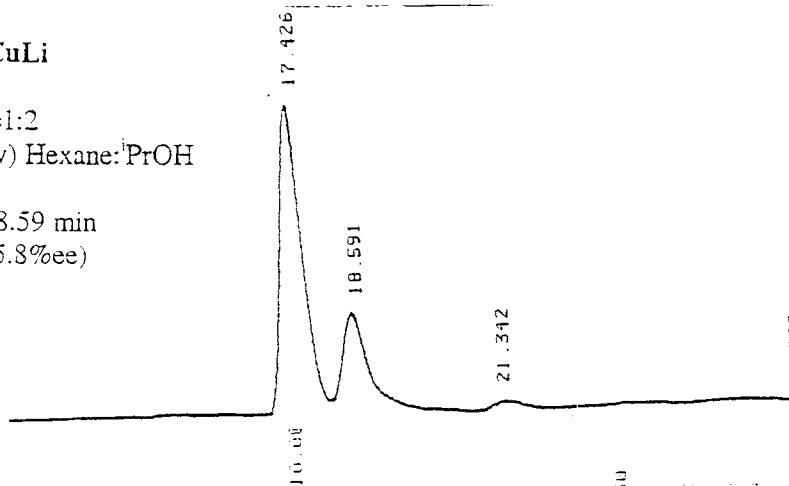

| AREA% | RT    | AREA     | TYPE    | WIDTH   |
|-------|-------|----------|---------|---------|
| 72.9  | 17.43 | 11457    | PU      | 0.095   |
| 27.1  | 18.59 | 779184   | BU      | 0.241   |
|       |       | 181556   | PU      | 0.236   |
|       |       | 11658408 | PU      | 0.485   |
|       |       | 4344250  | PU      | 0.563   |
|       |       | 114074   | PU      | 0.170   |
|       |       | 1014     | AREA    | 4157.07 |
|       |       | 100      | PERCENT | 100.00  |

$R_2CuLi$

Et<sub>2</sub>O:THF = 1:4  
99.8:0.2 (v:v) Hexane:PrOH  
0.6mL/min  
18.00 and 19.91 min  
71.5:28.5 (43%ee)

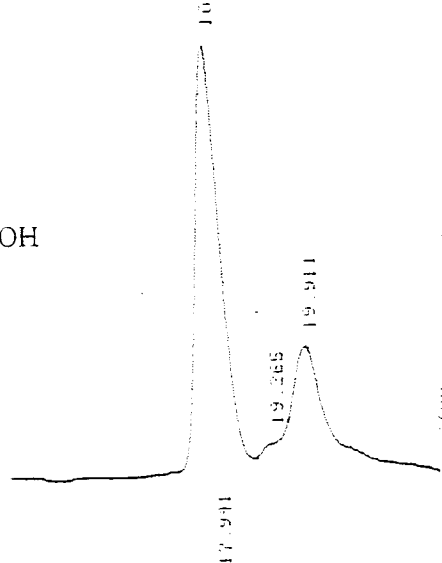

| AREA% | RT    | AREA  | TYPE    | WIDTH   |
|-------|-------|-------|---------|---------|
| 71.5  | 18.00 | 17101 | PU      | 0.095   |
| 28.5  | 19.91 | 41540 | BU      | 0.241   |
|       |       | 11000 | PU      | 0.236   |
|       |       | 25511 | PU      | 0.485   |
|       |       | 41540 | PU      | 0.485   |
|       |       | 11000 | PU      | 0.563   |
|       |       | 1014  | AREA    | 4157.07 |
|       |       | 100   | PERCENT | 100.00  |

Racemic

99.8:0.2 (v:v) Hexane:PrOH  
0.6mL/min  
17.79 and 18.74 min

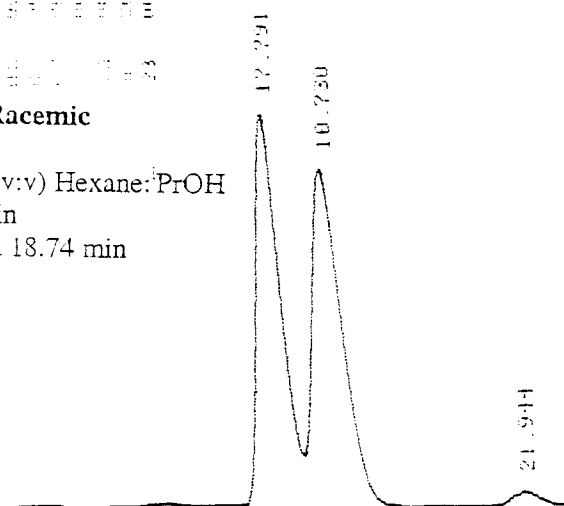

$RCuCNLi$

Et<sub>2</sub>O:THF = 1.3:1  
99.8:0.2 (v:v) Hexane:PrOH  
0.6mL/min  
17.94 and 19.07 min  
72.5:27.5 (45.7%ee)

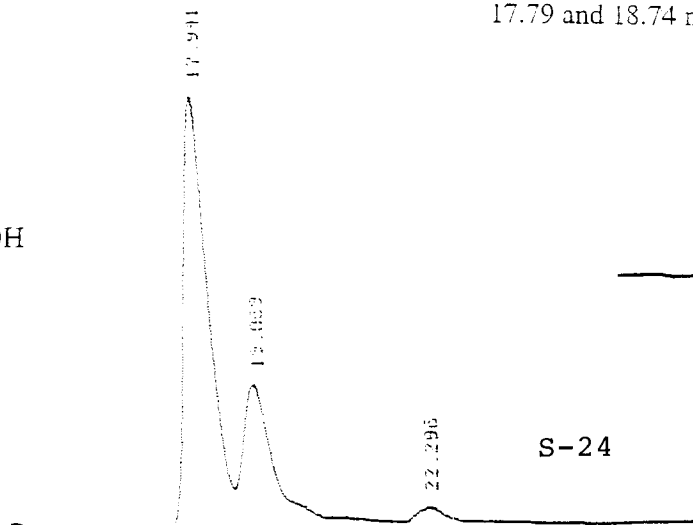



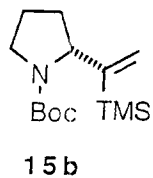

**Racemic**

99.5:0.5 (v:v) Hexane:PrOH  
1mL/min  
9.37 and 10.39 min

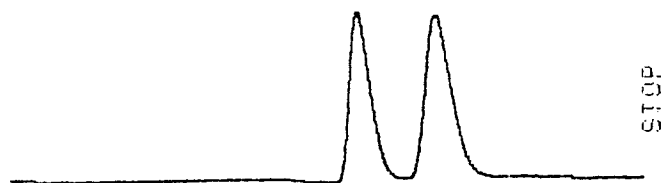

|        |         |      |         |          |          |
|--------|---------|------|---------|----------|----------|
| RUN#   | 249     | MOY  | 9, 2001 | 21:29:44 |          |
| AREA%  | RT      | AREA | TYPE    | WIDTH    | AREA%    |
| 3.320  | 59310   | 00   | 00      | 1.06     | 42.992   |
| 3.875  | 222554  | 00   | 00      | 1.55     | 1.61301  |
| 4.143  | 190579  | 00   | 00      | 1.95     | 1.38125  |
| 9.370  | 6052400 | 00   | 00      | 1.323    | 43.96513 |
| 10.390 | 7272596 | 00   | 00      | 1.399    | 52.70960 |

TOTAL AREA=1.37972+07  
MUL FACTOR=1.00000E+00

**R<sub>2</sub>CuLi**

99.5:0.5 (v:v) Hexane:PrOH  
1mL/min  
9.15 and 10.48 min  
95:5 (90%ee)

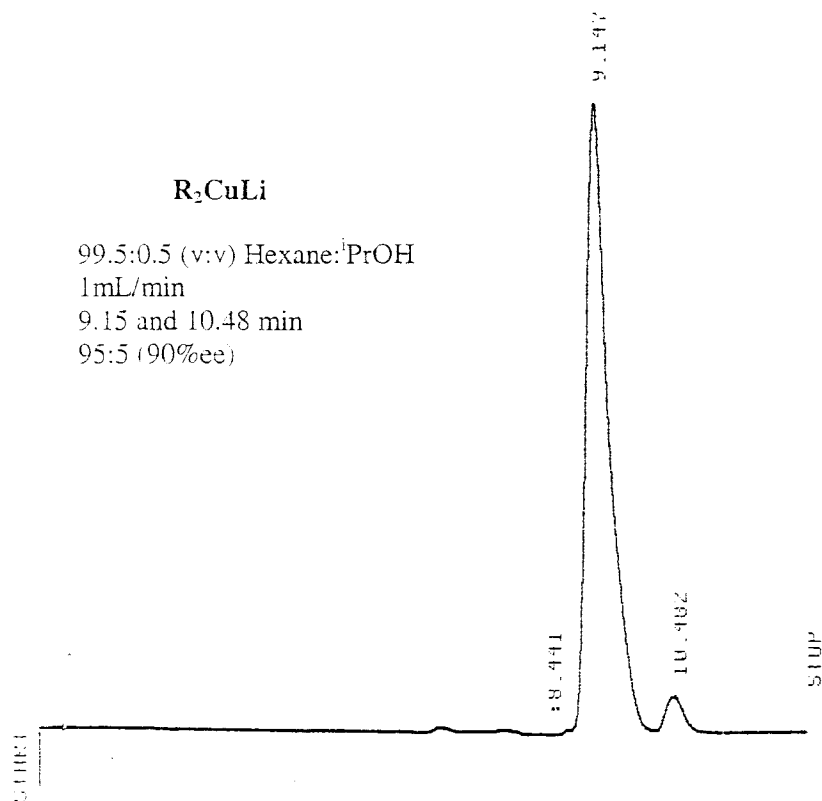

|                        |        |          |         |          |          |
|------------------------|--------|----------|---------|----------|----------|
| RUN#                   | 90     | JUN      | 6, 1901 | 10:15:16 |          |
| AREA%                  | RT     | AREA     | TYPE    | WIDTH    | AREA%    |
|                        | 9.147  | 10351648 | 00      | .422     | 95.05104 |
|                        | 10.482 | 955510   | 00      | .574     | 4.94900  |
| TOTAL AREA=1.03067E+07 |        |          |         |          |          |
| TOTAL COUNT=1.0000E+00 |        |          |         |          |          |

TOTAL AREA=1.93072+07  
MUL FACTOR=1.00000E+00

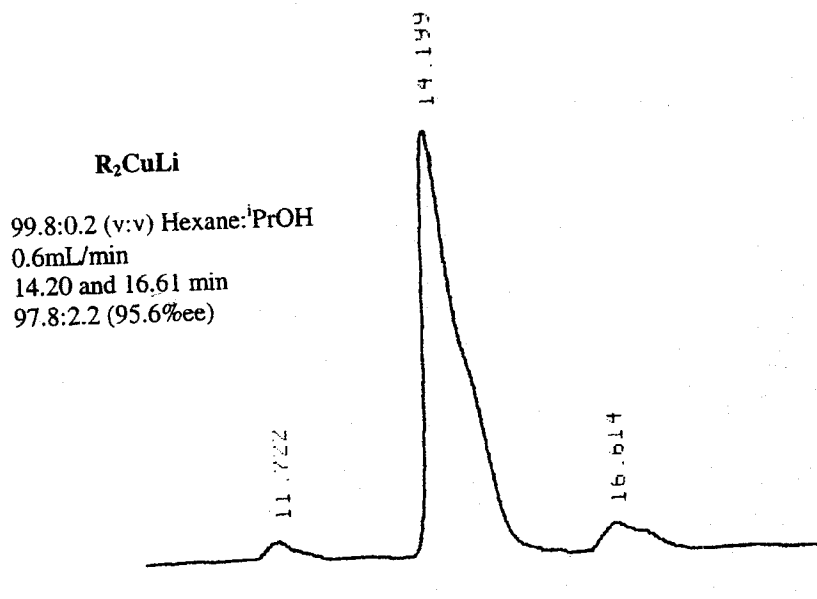

RUN# 799 JAN 28, 1901 18:37:07

| AREA# | RT    | AREA     | TYPE | WIDTH | AREA# |
|-------|-------|----------|------|-------|-------|
| 1     | 14.20 | 31211    | PB   | 0.292 | 1     |
| 2     | 16.61 | 41488    | UU   | 0.439 | 2     |
| 3     | 14.20 | 533960   | 9P   | 0.496 | 3     |
| 4     | 14.20 | 15317572 | PU   | 0.620 | 4     |
| 5     | 16.61 | 57230    | PB   | 0.132 | 5     |

TOTAL AREA=1.7335E+07  
MUL FACTOR=1.0000E+00

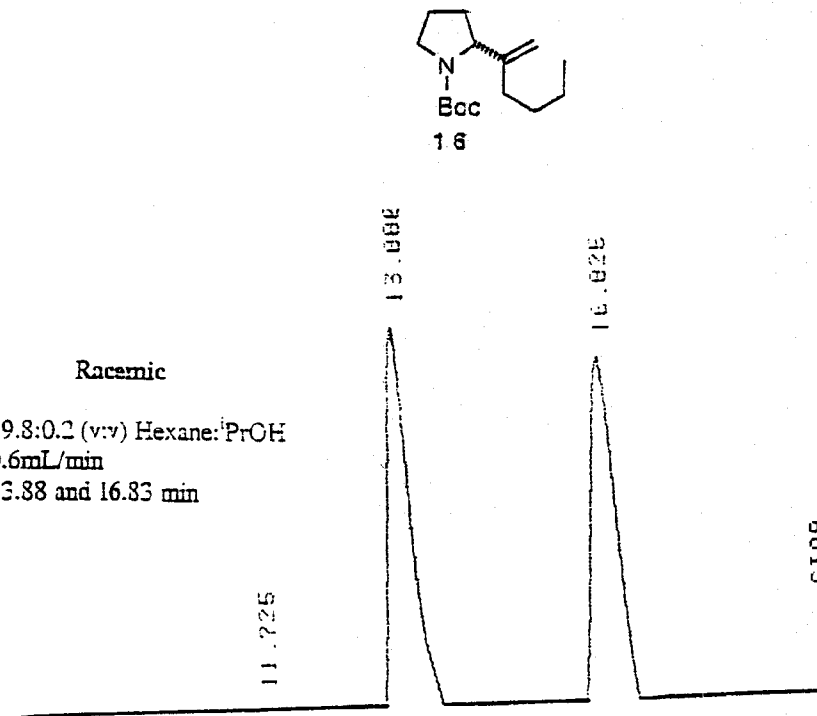

RUN# 52 JAN 2, 1901 10:26:45

| AREA# | RT    | AREA     | TYPE | WIDTH | AREA# |
|-------|-------|----------|------|-------|-------|
| 1     | 13.88 | 82548    | DP   | 0.207 | 1     |
| 2     | 16.83 | 22272    | PB   | 0.059 | 2     |
| 3     | 13.88 | 10977720 | BB   | 0.426 | 3     |
| 4     | 16.83 | 10671120 | BB   | 0.452 | 4     |

TOTAL AREA=2.1759E+07  
MUL FACTOR=1.0000E+00

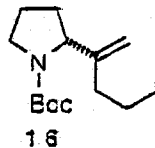

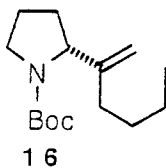

$R_2CuLi$

99.8:0.2 (v:v) Hexane:<sup>i</sup>PrOH  
0.6mL/min  
12.73 and 15.48 min  
92.1:7.9 (84.2%ee)

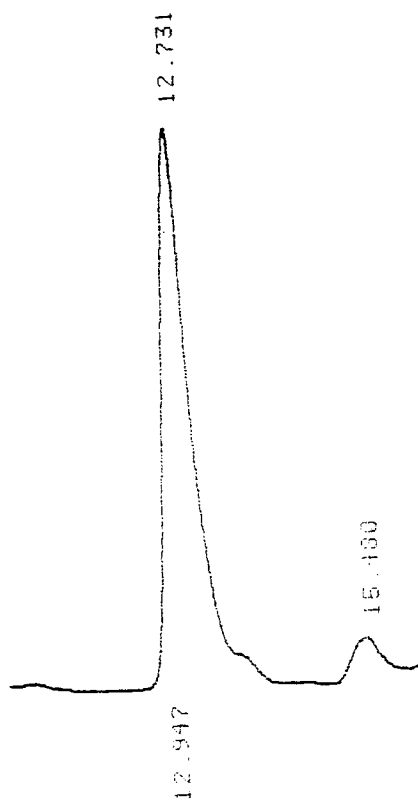

| AREA#  | RT     | AREA    | TYPE | WIDTH | AREA#    | RT     | AREA    | TYPE | WIDTH |
|--------|--------|---------|------|-------|----------|--------|---------|------|-------|
| 5.181  | 12.731 | 100312  | UU   | .214  | 5.2153   | 12.731 | 100312  | UU   | .214  |
| 5.680  | 15.480 | 122803  | UU   | .188  | .63846   | 15.480 | 122803  | UU   | .188  |
| 5.934  |        | 257850  | UP   | .233  | 1.34057  |        | 257850  | UP   | .233  |
| 12.731 |        | 1682424 | BP   | .495  | 87.46986 |        | 1682424 | BP   | .495  |
| 15.480 |        | 1442126 | BU   | .520  | 7.49767  |        | 1442126 | BU   | .520  |
| 16.236 |        | 487000  | UU   | .414  | 2.53193  |        | 487000  | UU   | .414  |

$RCuCNLi$

99.8:0.2 (v:v) Hexane:<sup>i</sup>PrOH  
0.6mL/min  
12.95 and 15.46 min  
92:8 (84%ee)

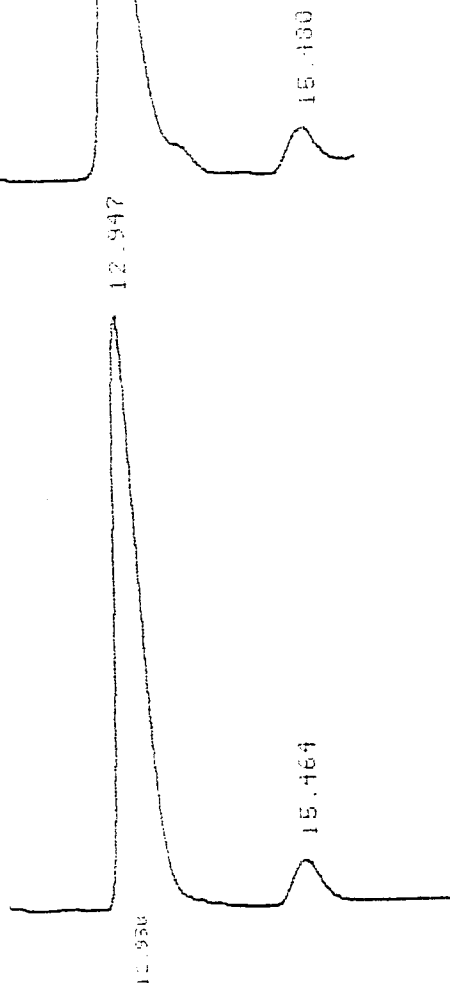

| AREA#  | RT     | AREA     | TYPE | WIDTH | AREA#    | RT     | AREA     | TYPE | WIDTH |
|--------|--------|----------|------|-------|----------|--------|----------|------|-------|
| 5.046  | 12.947 | 44289    | UU   | .131  | .24543   | 12.947 | 44289    | UU   | .131  |
| 5.292  | 15.464 | 114463   | UU   | .219  | .63430   | 15.464 | 114463   | UU   | .219  |
| 5.667  |        | 200347   | UU   | .252  | 1.11023  |        | 200347   | UU   | .252  |
| 10.776 |        | 649594   | UU   | .374  | 3.59974  |        | 649594   | UU   | .374  |
| 12.947 |        | 15732472 | BU   | .432  | 87.18186 |        | 15732472 | BU   | .432  |
| 15.464 |        | 1304420  | BU   | .458  | 7.22847  |        | 1304420  | BU   | .458  |

TOTAL AREA=1.8046E+07  
MUL FACTOR=1.0000E+00

$RCuCNLi$  (used CuCl)

99.8:0.2 (v:v) Hexane:<sup>i</sup>PrOH  
0.6mL/min  
12.93 and 15.58 min  
86.5:13.5 (73%ee)

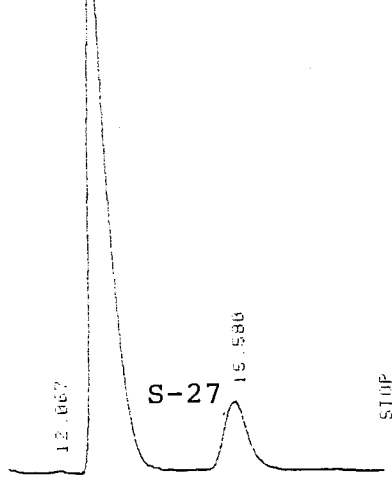

| AREA#  | RT     | AREA     | TYPE | WIDTH | AREA#    | RT     | AREA     | TYPE | WIDTH |
|--------|--------|----------|------|-------|----------|--------|----------|------|-------|
| 10.775 | 12.937 | 786125   | UU   | .332  | 3.55251  | 12.937 | 786125   | UU   | .332  |
| 12.967 | 15.580 | 83375    | BU   | .426  | .35130   | 15.580 | 83375    | BU   | .426  |
| 12.930 |        | 19555286 | PU   | .453  | 65.39535 |        | 19555286 | PU   | .453  |
| 15.560 |        | 3025094  | UU   | .532  | 12.90661 |        | 3025094  | UU   | .532  |

TOTAL AREA=1.3439E+07  
MUL FACTOR=1.0000E+00

# Racemic

99.8:0.2 (v:v) Hexane:<sup>i</sup>PrOH  
0.6mL/min  
18.25 and 19.78 min

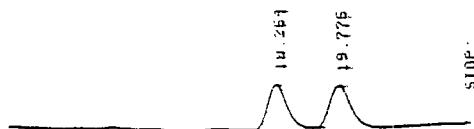

| RT          | AREA     |
|-------------|----------|
| 18.254      | 2321060  |
| 19.775      | 2393131  |
| TOTAL AREA  | 4714191  |
| IMP. FACTOR | 1.000000 |

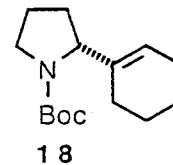

## R<sub>2</sub>CuLi from 3a

99.8:0.2 (v:v) Hexane:<sup>i</sup>PrOH  
0.6mL/min  
17.68 and 19.43 min  
90.7:9.3(81.4%ee)

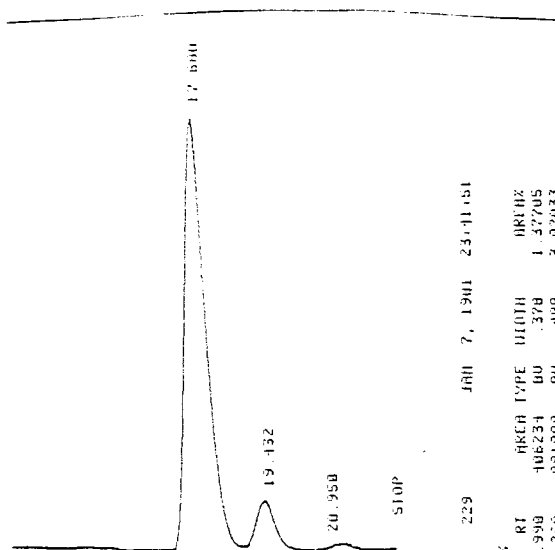

| RT          | AREA     | TYPE | WIDTH | IMP. FACTOR |
|-------------|----------|------|-------|-------------|
| 17.680      | 108234   | DP   | .378  | 1.000000    |
| 19.432      | 891009   | DP   | .310  | 3.02033     |
| TOTAL AREA  | 1000000  |      |       |             |
| IMP. FACTOR | 1.000000 |      |       |             |

## R<sub>2</sub>CuLi from -ONf 3c

99.8:0.2 (v:v) Hexane:<sup>i</sup>PrOH  
0.6mL/min  
18.45 and 20.32 min  
92:8(84%ee)

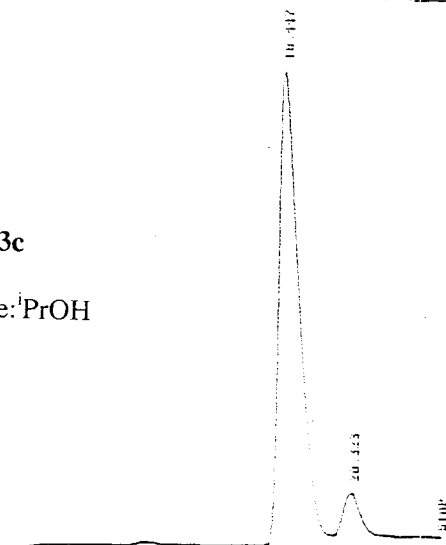

| RT          | AREA     | TYPE | WIDTH | IMP. FACTOR |
|-------------|----------|------|-------|-------------|
| 18.417      | 108234   | DP   | .378  | 1.000000    |
| 20.313      | 891009   | DP   | .310  | 3.02033     |
| TOTAL AREA  | 1000000  |      |       |             |
| IMP. FACTOR | 1.000000 |      |       |             |

## R<sub>2</sub>CuLi from 3b

99.8:0.2 (v:v) Hexane:<sup>i</sup>PrOH  
0.6mL/min  
17.26 and 18.68 min  
94.3:5.7(88.6%ee)

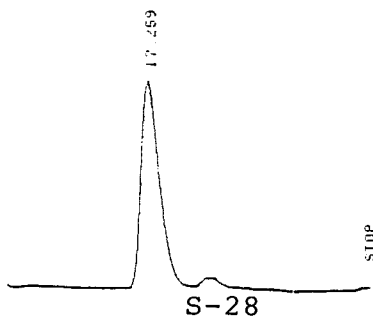

| RT          | AREA     | TYPE | WIDTH | IMP. FACTOR |
|-------------|----------|------|-------|-------------|
| 17.259      | 108234   | DP   | .378  | 1.000000    |
| 18.680      | 891009   | DP   | .310  | 3.02033     |
| TOTAL AREA  | 1000000  |      |       |             |
| IMP. FACTOR | 1.000000 |      |       |             |

99.5:0.5 (v/v) Hexane:PrOH  
1mL/min  
11.04 and 12.88 min  
93.7:6.3 (87%ee)

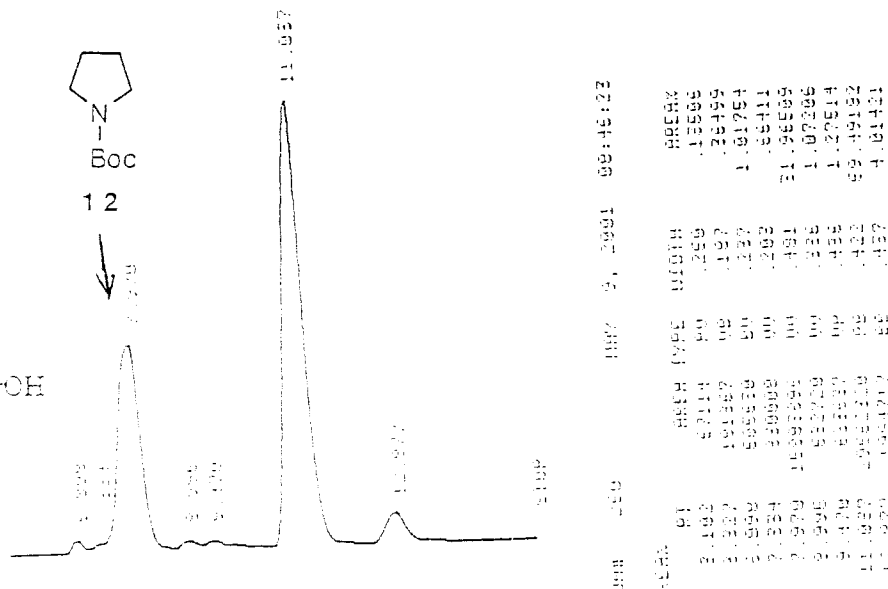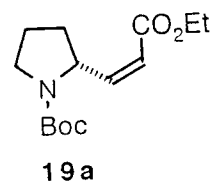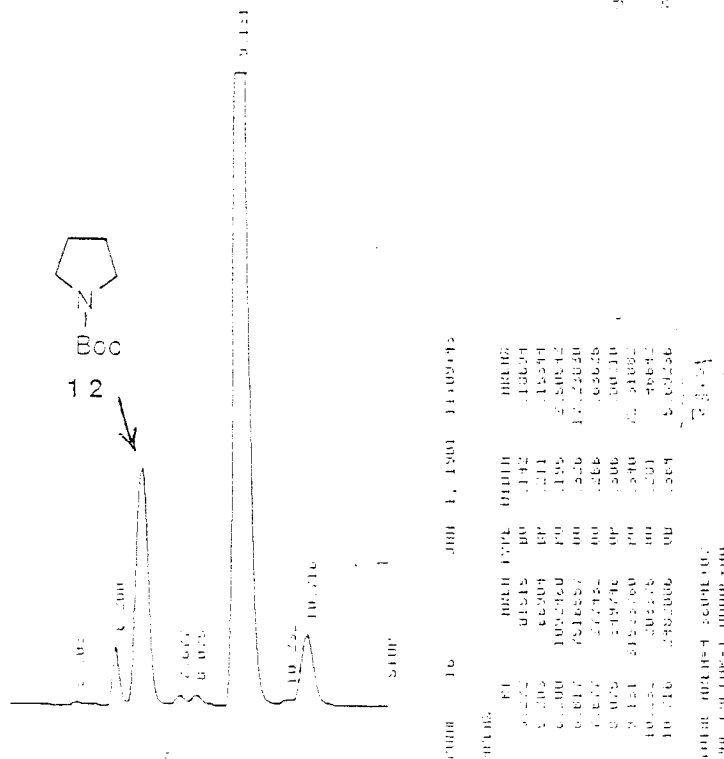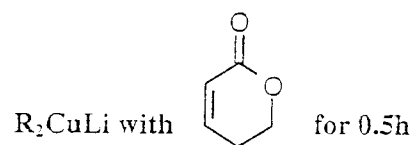

95.5:0.5 (v/v) Hexane:PrOH  
1mL/min  
9.13 and 10.72 min  
92.7:7.3 (85.4%ee)

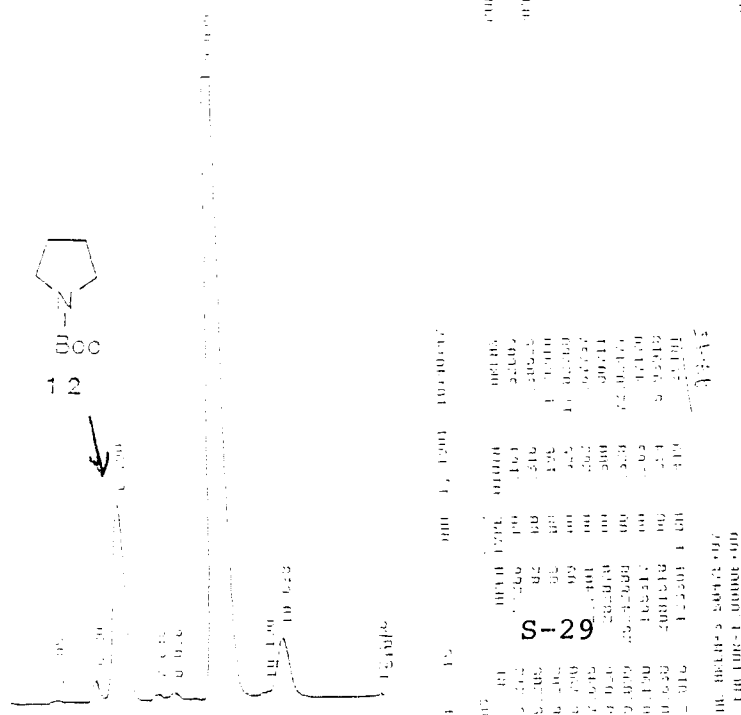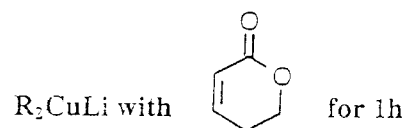

99.5:0.5 (v/v) Hexane:PrOH  
1mL/min  
9.09 and 10.64 min  
92.5:7.5 (85%)

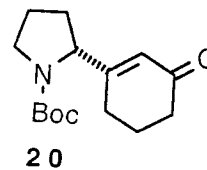

# Racemic

98:2 (v:v) Hexane:PrOH  
1.3mL/min  
14.87 and 17.32 min

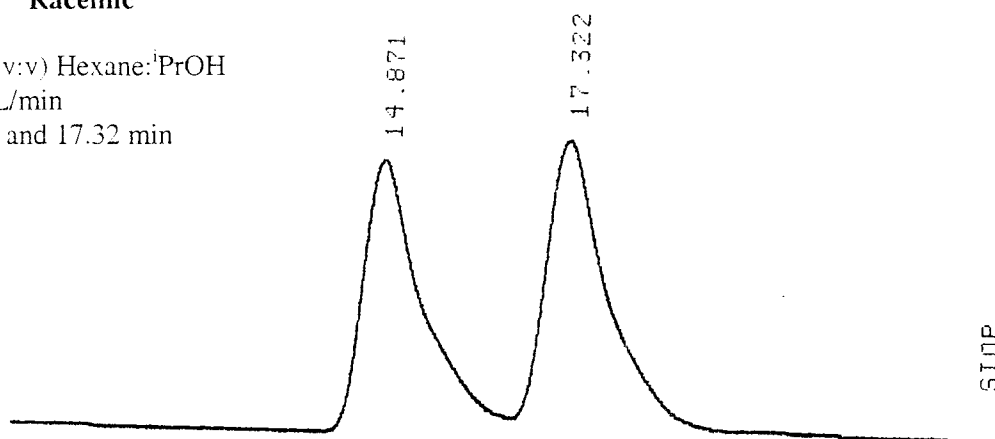

|       |        |              |          |       |          |
|-------|--------|--------------|----------|-------|----------|
| RUN#  | 26     | DEC 20, 2000 | 15:39:18 |       |          |
| AREA% | RT     | AREA         | TYPE     | WIDTH | AREA%    |
|       | 14.871 | 6728378      | BU       | .903  | 46.94435 |
|       | 17.322 | 7604288      | UB       | .945  | 53.05566 |

# R<sub>2</sub>CuLi

98:2 (v:v) Hexane:PrOH  
1.3mL/min  
12.97 and 14.49 min  
80:20 (60%ee)

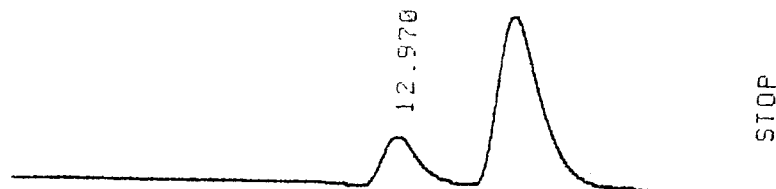

|       |        |             |          |       |          |
|-------|--------|-------------|----------|-------|----------|
| RUN#  | 66     | FEB 5, 2001 | 17:19:54 |       |          |
| AREA% | RT     | AREA        | TYPE     | WIDTH | AREA%    |
|       | 2.400  | 238480      | PU       | .506  | .70972   |
|       | 2.940  | 454245      | UU       | .111  | 1.35183  |
|       | 6.391  | 94400       | BU       | .318  | .28093   |
|       | 6.889  | 218594      | UU       | .332  | .65853   |
|       | 12.970 | 6609440     | PU       | .570  | 19.66966 |
|       | 14.490 | 25987056    | UB       | .671  | 77.33734 |

TOTAL AREA=3.3602E+07  
MUL FACTOR=1.0000E+00

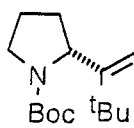

21

Racemic

99.8:0.2 (v:v) Hexane:PrOH  
0.6mL/min  
11.13 and 12.26 min

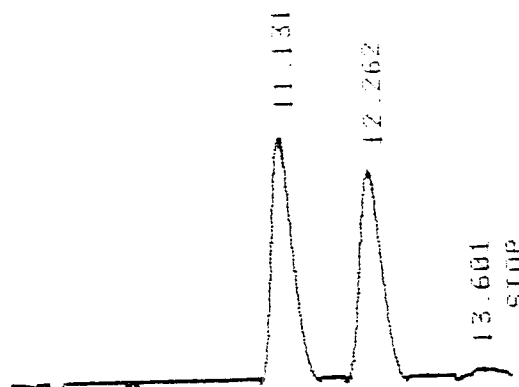

| AREA%  | RT      | AREA     | TYPE | WIDTH | AREA% |
|--------|---------|----------|------|-------|-------|
| 5.965  | 9.01847 | 9.09283  | BU   | 0.230 |       |
| 11.131 | 4004878 | 43.93162 | BB   | 0.302 |       |
| 12.262 | 3796986 | 41.65114 | BU   | 0.331 |       |
| 12.732 | 259638  | 2.84811  | UP   | 0.623 |       |
| 13.601 | 152816  | 1.67632  | PU   | 0.245 |       |

R<sub>2</sub>CuLi

99.8:0.2 (v:v) Hexane:PrOH  
0.6mL/min  
11.21 and 12.39 min  
89.5:10.5 (79%ee)

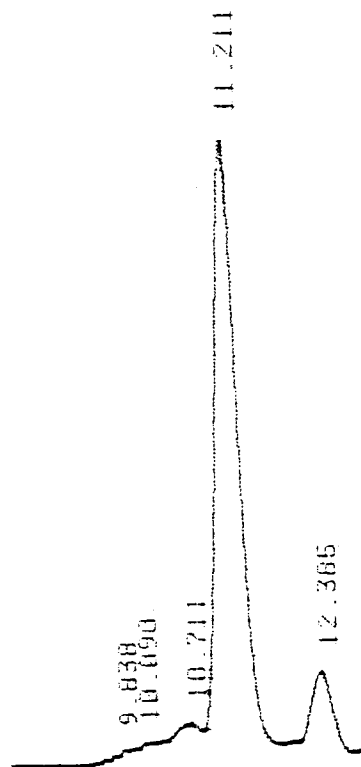

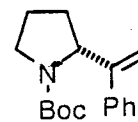

22

Racemic

99.5:0.5 (v:v) Hexane:<sup>i</sup>PrOH  
1mL/min  
10.68 and 16.14 min

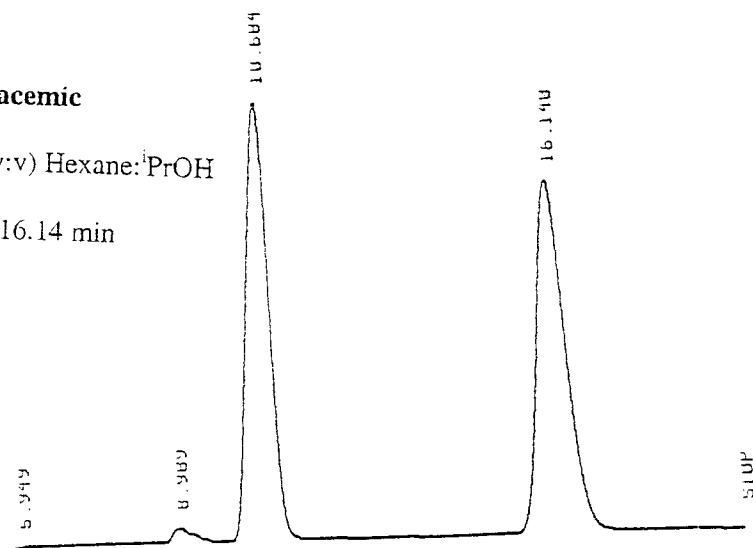

| KU#    | 28       | JUN 1, 1981 | 06:41:56 |
|--------|----------|-------------|----------|
| HRHZ   | RI       | HRHZ        | TYPE     |
| 5.010  | 31075    | PU          | .127     |
| 4.977  | 18555    | PU          | .111     |
| 5.273  | 73451    | PU          | .245     |
| 5.949  | 99261    | PU          | .215     |
| 8.989  | 915030   | PU          | .401     |
| 10.684 | 53551744 | PU          | .485     |
| 16.140 | 53551192 | PU          | .608     |

TOTAL HRHZ=6.80751E7  
MUL FHC10K=1.00000E00

R<sub>2</sub>CuLi

99.5:0.5 (v:v) Hexane:<sup>i</sup>PrOH  
1mL/min  
10.56 and 15.91 min  
95.5:4.5 (91%ee)

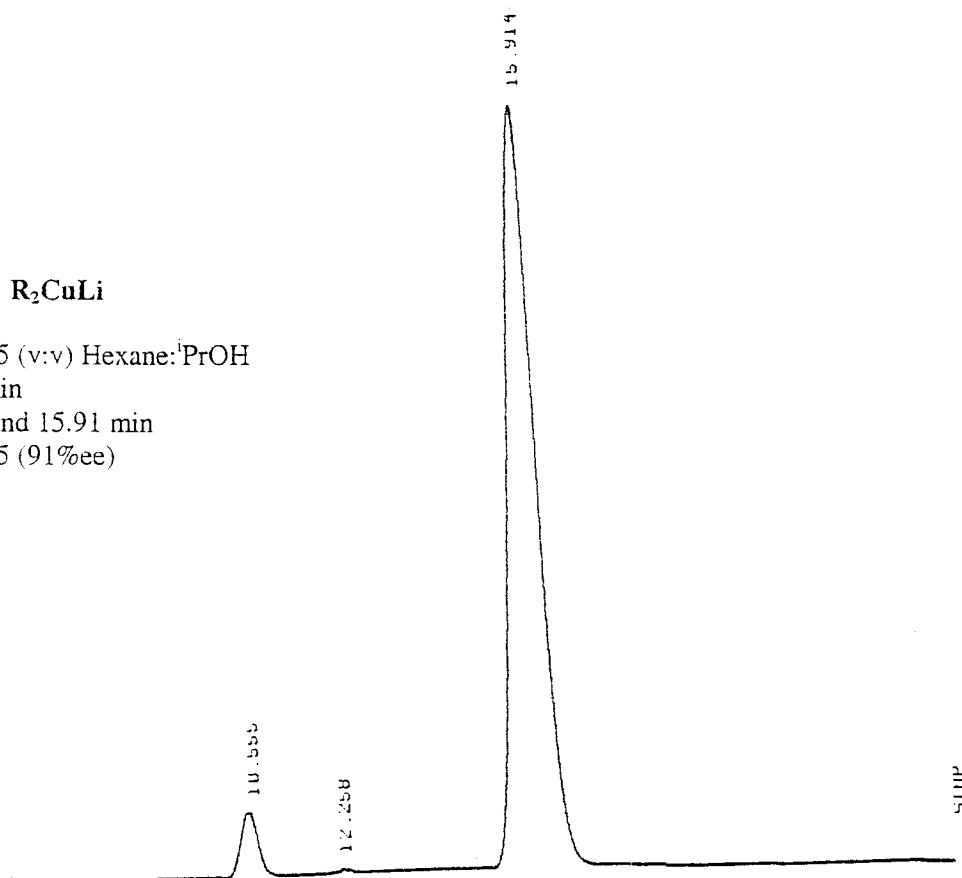

| KU#    | 29       | JUN 1, 1981 | 07:06:25 |
|--------|----------|-------------|----------|
| HRHZ   | RI       | HRHZ        | TYPE     |
| 3.865  | 16688    | PU          | .097     |
| 4.468  | 258400   | PU          | .283     |
| 5.132  | 717619   | PU          | .588     |
| 10.555 | 3810690  | PU          | .584     |
| 12.258 | 206210   | PP          | .349     |
| 15.914 | 74110336 | PP          | .614     |

TOTAL HRHZ=7.91201E7  
MUL FHC10K=1.00000E00



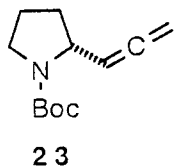

Racemic

99.5:0.5 (v:v) Hexane:<sup>i</sup>PrOH  
0.5mL/min  
17.74 and 19.60 min

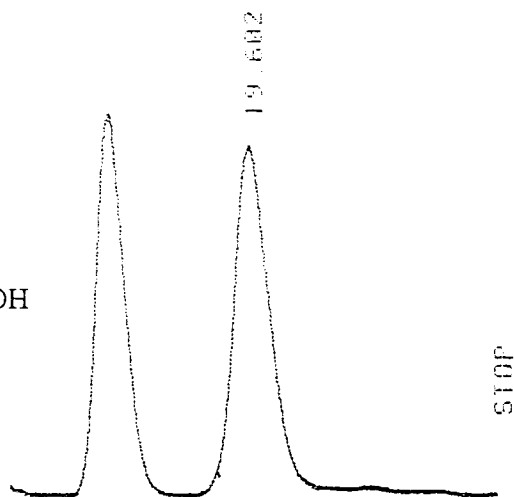

| RT     | AREA     | TYPE | WIDTH | AREA     |
|--------|----------|------|-------|----------|
| 6.196  | 216920   | BU   | .275  | 1.09108  |
| 7.858  | 11252    | PR   | .065  | .05660   |
| 16.138 | 374107   | BU   | .407  | 1.88172  |
| 17.744 | 9228506  | UP   | .442  | 46.41829 |
| 19.602 | 10050400 | UP   | .528  | 50.55234 |

R<sub>2</sub>CuLi from 8a

99.5:0.5 (v:v) Hexane:<sup>i</sup>PrOH  
0.5mL/min  
17.58 and 19.43 min  
58.4:41.6 (16.8%ee)

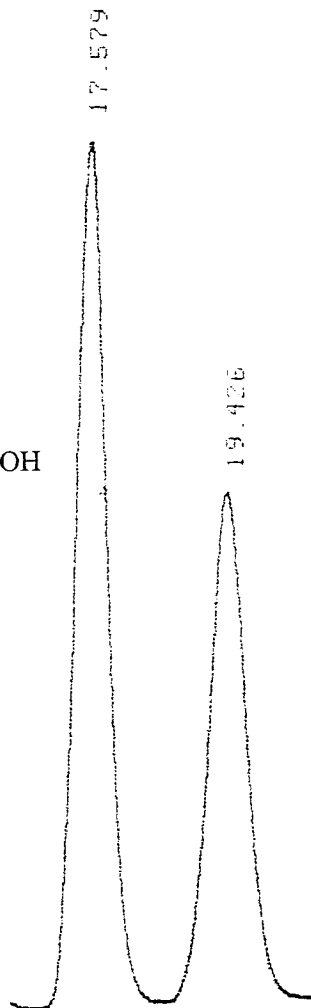

| RT     | AREA     | TYPE | WIDTH | AREA     |
|--------|----------|------|-------|----------|
| 5.839  | 35657    | BU   | .119  | .07872   |
| 6.145  | 901084   | UU   | .297  | 1.98926  |
| 11.201 | 718068   | BU   | .314  | 1.58523  |
| 12.155 | 758515   | BP   | .320  | 1.67452  |
| 13.684 | 1618640  | BP   | .330  | 3.57336  |
| 16.212 | 1044274  | PU   | .409  | 2.30537  |
| 17.579 | 23008384 | BU   | .480  | 50.79395 |
| 19.426 | 16399800 | UU   | .577  | 36.20467 |
| 20.883 | 813079   | UU   | .382  | 1.79498  |

TOTAL AREA=4.5298E+07  
MUL FACTOR=1.0000E+00

# **R<sub>2</sub>CuLi from 8a**

99.5:0.5 (v:v) Hexane:PrOH  
0.5mL/min  
21.15 and 23.28 min  
66.7:33.3 (33.4%ee)

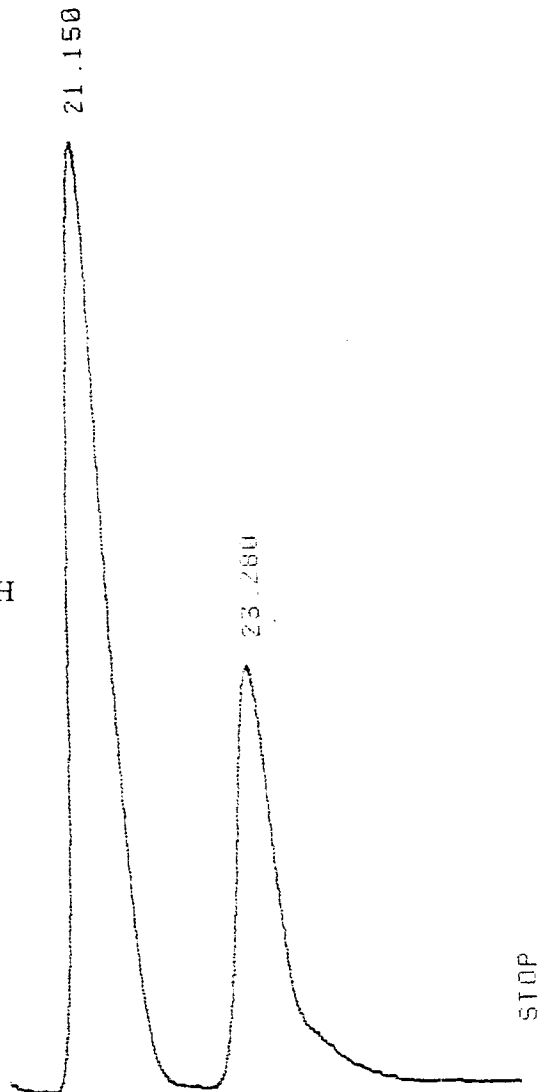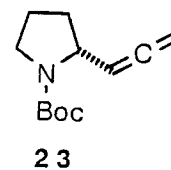

| AREA# | RT     | AREA     | WIDTH | TYPE | RT | AREA     | WIDTH | TYPE |
|-------|--------|----------|-------|------|----|----------|-------|------|
| 1     | 8.089  | 2674494  | .390  | BU   | 5  | 47509    |       |      |
| 2     | 9.192  | 370340   | .348  | BU   | 6  | 75814    |       |      |
| 3     | 13.623 | 16845    | .065  | BU   | 7  | 05448    |       |      |
| 4     | 13.897 | 271015   | .269  | UU   | 8  | 55481    |       |      |
| 5     | 15.030 | 39360    | .115  | BU   | 9  | 08058    |       |      |
| 6     | 19.567 | 1887536  | .441  | BU   | 10 | 3.86407  |       |      |
| 7     | 21.150 | 29035232 | .560  | PU   | 11 | 59.43949 |       |      |
| 8     | 23.280 | 14553576 | .633  | UU   | 12 | 29.79337 |       |      |

TOTAL AREA=+1.8848E+07  
MUL FACTOR=1.0000E+00

# **R<sub>2</sub>CuLi from 8b**

99.5:0.5 (v:v) Hexane:PrOH  
0.5mL/min  
21.47 and 23.29 min  
74.4:25.6 (48.6%ee)

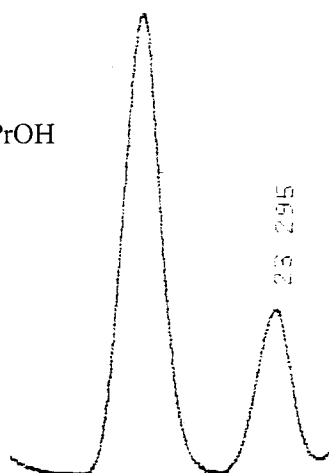

| AREA# | RT     | AREA     | WIDTH | TYPE | RT | AREA     | WIDTH | TYPE |
|-------|--------|----------|-------|------|----|----------|-------|------|
| 1     | 8.070  | 464760   | .391  | PU   | 1  | 95868    |       |      |
| 2     | 9.078  | 180808   | .231  | UU   | 2  | 76200    |       |      |
| 3     | 11.294 | 55755    | .173  | UU   | 3  | 23497    |       |      |
| 4     | 13.708 | 27385    | .073  | BU   | 4  | 11541    |       |      |
| 5     | 13.905 | 158126   | .252  | UU   | 5  | 66640    |       |      |
| 6     | 19.341 | 26567    | .071  | BU   | 6  | 11196    |       |      |
| 7     | 19.639 | 330457   | .281  | UU   | 7  | 139267   |       |      |
| 8     | 21.470 | 14915736 | .588  | BU   | 8  | 62.86072 |       |      |
| 9     | 23.295 | 5208640  | .572  | BU   | 9  | 21.91752 |       |      |
| 10    | 24.371 | 2368005  | .682  | UP   | 10 | 9.97969  |       |      |

TOTAL AREA=2.3728E+07  
MUL FACTOR=1.0000E+00

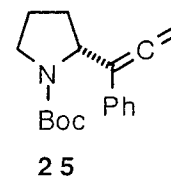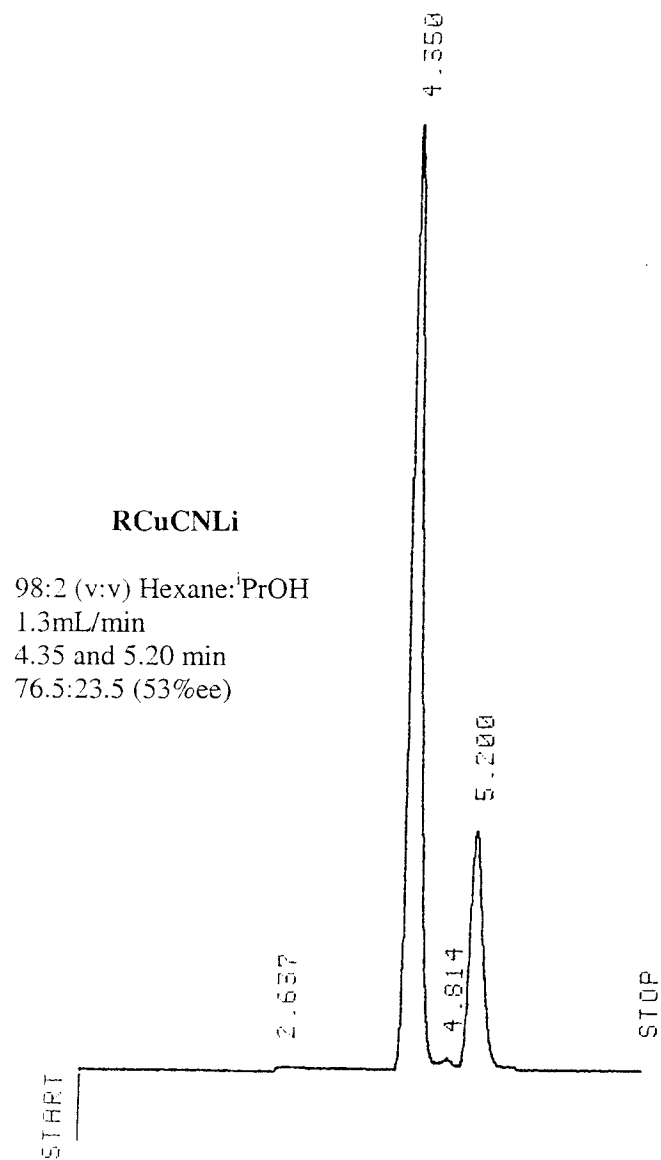

RUN# 137 FEB 27, 2001 05:49:46

| RT    | AREA     | TYPE | WIDTH | AREA%    |
|-------|----------|------|-------|----------|
| 2.637 | 67521    | BU   | .109  | .14921   |
| 4.350 | 34288960 | UU   | .168  | 75.99965 |
| 4.814 | 398800   | UU   | .180  | .88394   |
| 5.200 | 10362175 | UB   | .199  | 22.96722 |

TOTAL AREA=4.5117E+07

MUL FACTOR=1.0000E+00

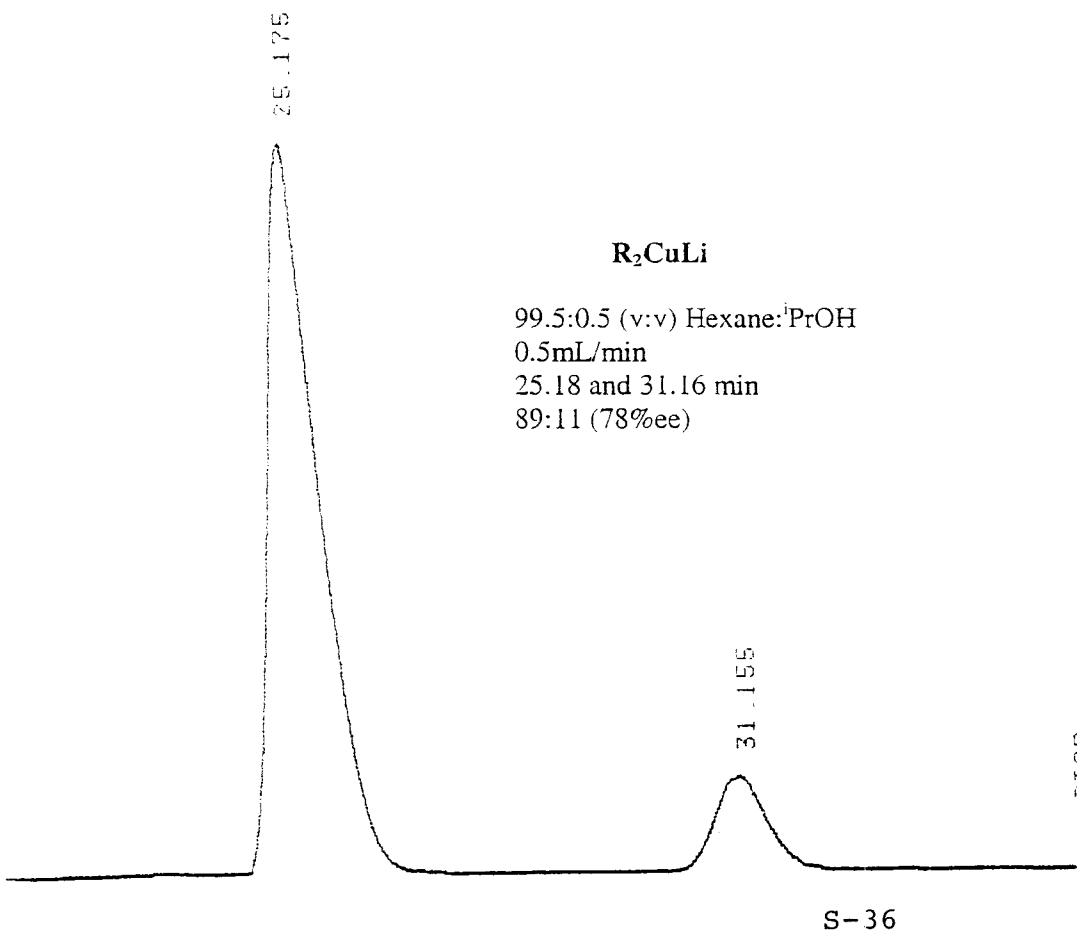

### $R_2CuLi$

99.5:0.5 (v:v) Hexane:PrOH  
0.5mL/min  
25.18 and 31.16 min  
89:11 (78%ee)

STOP

| AREA%  | RT     | AREA     | TYPE | WIDTH | AREA%    |
|--------|--------|----------|------|-------|----------|
| 1.090  | 25.175 | 7808     | BU   | .073  | .02184   |
| 6.802  | 31.155 | 129963   | BU   | .278  | .36349   |
| 8.400  |        | 139904   | BP   | .243  | .39129   |
| 25.175 |        | 31616880 | UU   | .781  | 88.42848 |
| 31.155 |        | 3859646  | UU   | .750  | 10.79494 |

TOTAL AREA=3.5754E+07  
NULL FACTOR=1.0000E+00

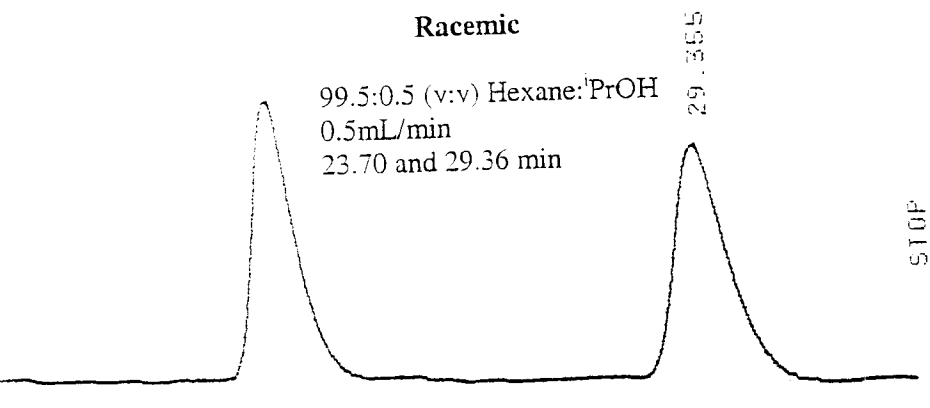

### Racemic

99.5:0.5 (v:v) Hexane:PrOH  
0.5mL/min  
23.70 and 29.36 min

STOP

| AREA%  | RT     | AREA     | TYPE | WIDTH | AREA%    |
|--------|--------|----------|------|-------|----------|
| .602   | 23.704 | 3380008  | BU   | .344  | 12.44897 |
| 1.619  | 29.355 | 2566558  | UB   | .311  | 9.45293  |
| 6.615  |        | 274537   | BU   | .297  | 1.01115  |
| 8.297  |        | 169227   | BP   | .250  | .62328   |
| 23.704 |        | 10374888 | BP   | .673  | 38.21194 |
| 29.355 |        | 10385696 | BU   | .800  | 38.25174 |

TOTAL AREA=2.7151E+07  
NULL FACTOR=1.0000E+00

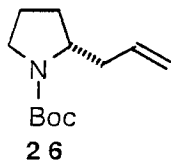

RUN# 88 JAN 3, 1901 21:12:49

# Racemic

97:3 (v:v) Hexane:PrOH  
0.5mL/min  
12.82 and 14.05 min

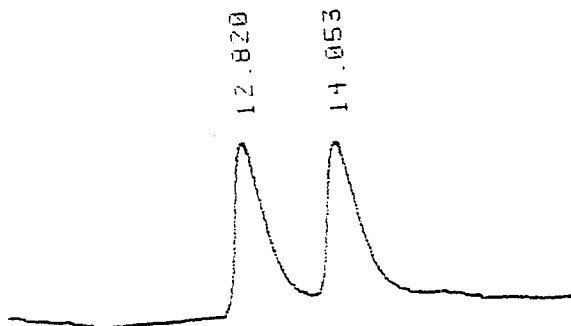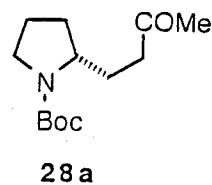

# R<sub>2</sub>CuLi

97:3 (v:v) Hexane:PrOH  
0.5mL/min  
13.37 and 14.79 min  
97:3 (94%ee)

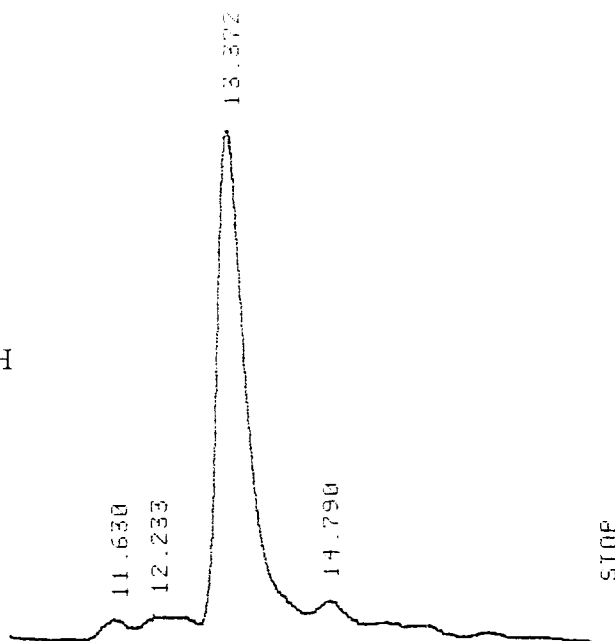

RUN# 203 JAN 7, 1901 08:38:45

| AREA%  | RT     | AREA     | TYPE | WIDTH | AREA%    |
|--------|--------|----------|------|-------|----------|
| 5.760  | 5.760  | 3598656  | BU   | .373  | 12.79540 |
| 6.575  | 6.575  | 7727923  | UU   | .779  | 27.47743 |
| 8.469  | 8.469  | 333261   | BU   | .247  | 1.18494  |
| 8.982  | 8.982  | 1569762  | UP   | .486  | 5.58145  |
| 11.630 | 11.630 | 292164   | PP   | .332  | 1.03882  |
| 12.233 | 12.233 | 78855    | PU   | .216  | .28038   |
| 13.372 | 13.372 | 14099608 | PU   | .472  | 50.13259 |
| 14.790 | 14.790 | 424396   | BP   | .376  | 1.50098  |

TOTAL AREA=2.8125E+07  
MUL FACTOR=1.0000E+00

# R<sub>2</sub>CuLi

97:3 (v:v) Hexane:PrOH  
0.5mL/min  
12.64 and 13.88 min  
90:10 (80%ee)

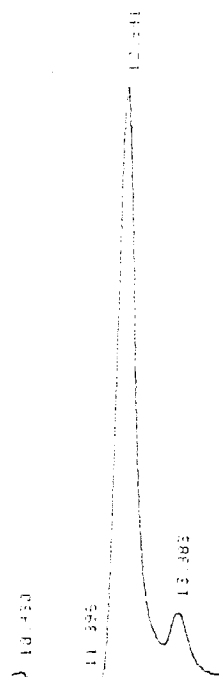

RUN# 362 JAN 13, 1901 21:02:45

| AREA%  | RT     | AREA     | TYPE | WIDTH | AREA%    |
|--------|--------|----------|------|-------|----------|
| 5.710  | 5.710  | 267393   | BU   | .113  | .66527   |
| 6.035  | 6.035  | 4102405  | UP   | .353  | 10.18009 |
| 6.937  | 6.937  | 38605    | PU   | .157  | .95507   |
| 7.614  | 7.614  | 315573   | BU   | .374  | 7.83915  |
| 9.102  | 9.102  | 1115969  | BU   | .336  | 2.77144  |
| 9.936  | 9.936  | 317885   | UU   | .328  | 78925    |
| 10.430 | 10.430 | 325159   | UP   | .360  | 80751    |
| 11.895 | 11.895 | 1422     | BU   | .018  | .00353   |
| 12.042 | 12.042 | 23564    | BU   | .090  | .05852   |
| 12.641 | 12.641 | 26627568 | UU   | .485  | 66.12806 |
| 13.803 | 13.803 | 3047754  | UU   | .522  | 7.56887  |
| 15.150 | 15.150 | 590520   | BP   | .419  | 1.46552  |
| 15.851 | 15.851 | 651534   | UU   | .462  | 1.61805  |

TOTAL AREA=4.0267E+07  
MUL FACTOR=1.0000E+00

98:2 (v:v) Hexane:<sup>i</sup>PrOH  
0.6mL/min  
14.71 and 19.24 min

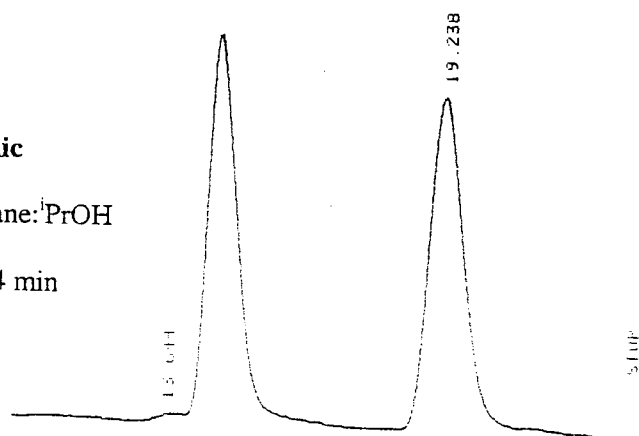

| NAME | AGE | DATE         | HEIGHT | WEIGHT | HAIR | COMPLEXION | RELIGION   | EDUCATION | STATUS  | REMARKS |
|------|-----|--------------|--------|--------|------|------------|------------|-----------|---------|---------|
| JOHN | 45  | JUN 16, 1901 | 171    | 144    | BRN  | FAIR       | PROTESTANT | GRADUATE  | WIDOWED |         |
| JOHN | 45  | JUN 16, 1901 | 171    | 144    | BRN  | FAIR       | PROTESTANT | GRADUATE  | WIDOWED |         |

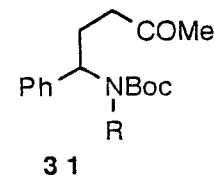

98:2 (v:v) Hexane:<sup>i</sup>PrOH  
0.6mL/min  
14.54 and 19.12 min  
59.6:40.4 (19.2%ee)

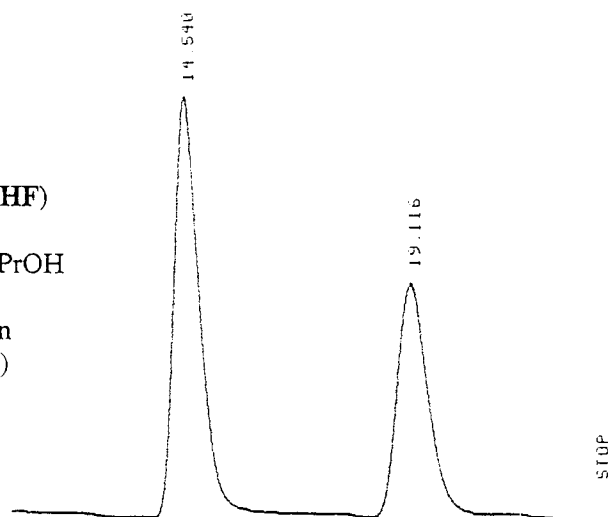

```

RUM# 456 JAN 16, 1961 18:46:47
AREA%
RT AREA TYPE WIDTH AREA%
B.955 5666 PU .031 .01051
9.529 156623 PU .272 .36896
14.548 20700000 PU .594 59.38922
19.116 14020984 BU .719 40.21130

TOTAL AREA=3.4868E+07
MUL FACTOR=1.0000E+00

```

97:3 (v:v) Hexane:<sup>i</sup>PrOH  
0.5mL/min  
15.12 and 19.82 min  
68.1:31.9 (36.2%ee)

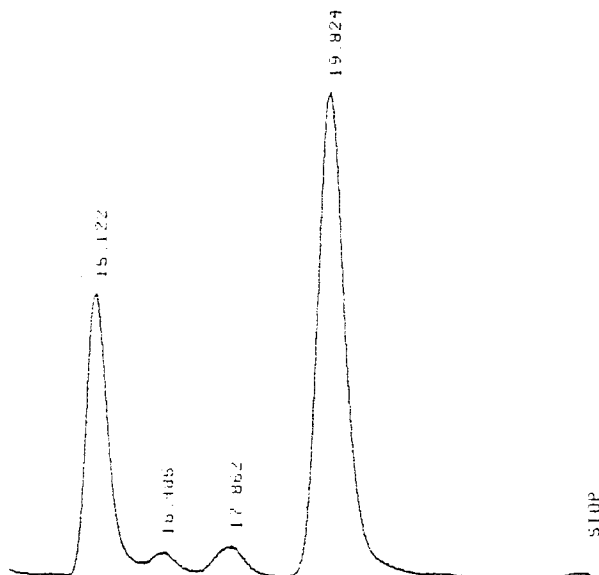

|                        |         |              |          |
|------------------------|---------|--------------|----------|
| RUN#                   | 457     | JAN 16, 1901 | 19:33:39 |
| AREA#                  |         |              |          |
| RI                     | AREA    | TYPE         | OUTH     |
| 4.848                  | 73756   | PO           | .235     |
| 8.843                  | 71253   | BU           | .195     |
| 9.659                  | 1314037 | UU           | .373     |
| 10.065                 | 1363658 | UU           | .583     |
| 11.705                 | 208416  | BU           | .410     |
| 13.095                 | 65280   | BU           | .426     |
| 15.122                 | 1247256 | BU           | .518     |
| 16.785                 | 1427266 | UU           | .680     |
| 17.862                 | 2039425 | UU           | .766     |
| 19.024                 | 2660384 | PO           | .646     |
| 24.765                 | 43101   | UU           | .209     |
| TOTAL AREA=4.6535E+07  |         |              |          |
| FOLD FACTOR=1.0000E+00 |         |              |          |

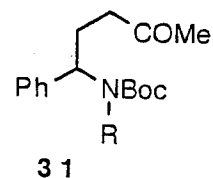

$R_2CuLi$  ( $Et_2O$ )

98:2 (v:v) Hexane:PrOH  
0.6mL/min  
16.92 and 22.29 min  
71.1:28.9 (42.2%ee)

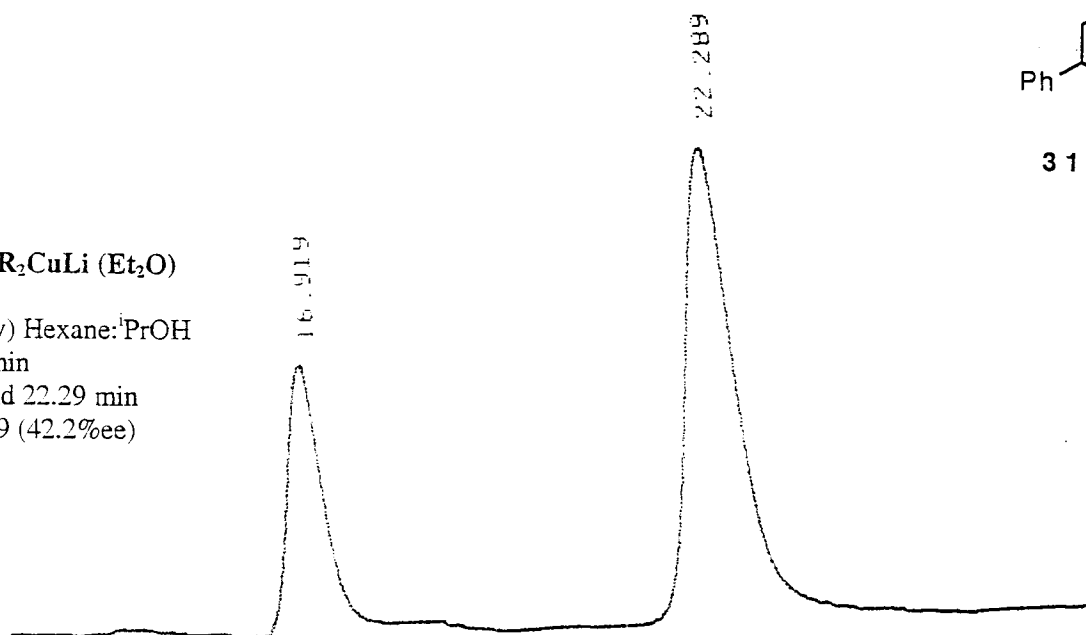

$R_2CuLi$  ( $Et_2O$ )

97:3 (v:v) Hexane:PrOH  
0.6mL/min  
11.95 and 14.81 min  
69.5:30.5 (39%ee)

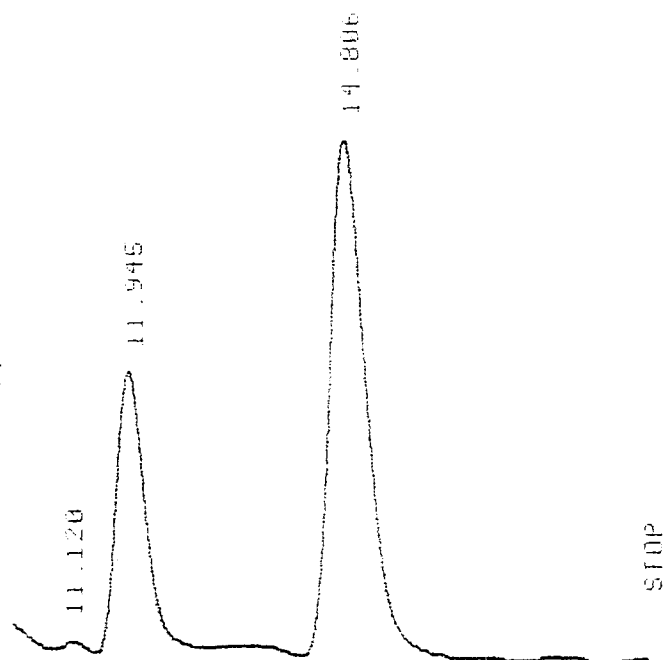

NB: Retention time is not the same  
because different solvent ratio's used

RUN# 460 JAN 16, 1981 22:11:54

| RT     | AREA     | TYPE | WIDTH | AREA%    |
|--------|----------|------|-------|----------|
| 4.745  | 39935    | PU   | .124  | .10950   |
| 5.195  | 11149360 | UU   | .577  | 30.57240 |
| 8.210  | 3045062  | UP   | .479  | 8.34980  |
| 9.369  | 5566     | PU   | .036  | .01526   |
| 9.749  | 5112     | UU   | .036  | .01402   |
| 9.870  | 20321    | UU   | .095  | .05572   |
| 11.120 | 147870   | UP   | .360  | 1.0549   |
| 11.945 | 6728090  | PU   | .437  | 18.44894 |
| 14.806 | 15327384 | UU   | .540  | 42.02886 |

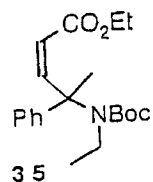

from R<sub>2</sub>CuCNLi  
 (-)-sparteine (THF)  
 38 % ee

99.5:0.5 (v:v) Hexane:PrOH  
 0.6mL/min

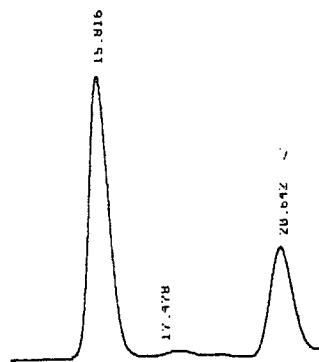

| RT     | AREA    | TYPE | WIDTH | AREAX    |
|--------|---------|------|-------|----------|
| 5.073  | 117516  | BU   | .228  | .66450   |
| 15.816 | 8374016 | PU   | .271  | 47.35096 |
| 17.478 | 10946   | BU   | .088  | .06189   |
| 20.642 | 7849130 | BU   | .690  | 44.38296 |
| 22.359 | 1333394 | PU   | .292  | 7.53969  |

(-)-sparteine (Et<sub>2</sub>O)  
 16 % ee

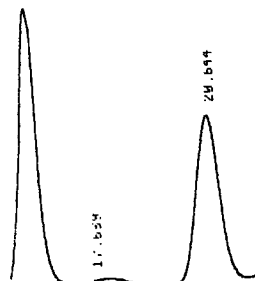

| RT     | AREA     | TYPE | WIDTH | AREAX    |
|--------|----------|------|-------|----------|
| 15.884 | 17522496 | UU   | .570  | 50.52717 |
| 17.639 | 6862     | PU   | .052  | .01979   |
| 20.644 | 12904800 | BU   | .706  | 37.21178 |
| 22.518 | 3272214  | UU   | .732  | 9.43563  |

TMEDA (Et<sub>2</sub>O)  
 32 % ee

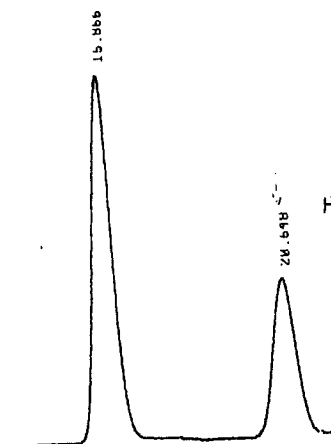

| RT     | AREA     | TYPE | WIDTH | AREAX    |
|--------|----------|------|-------|----------|
| 9.066  | 57141    | PU   | .194  | .14759   |
| 10.569 | 13793    | PU   | .106  | .03563   |
| 15.866 | 23490672 | BU   | .585  | 60.67374 |
| 20.648 | 12410224 | UU   | .711  | 32.05419 |

TMEDA (THF)  
 55 % ee

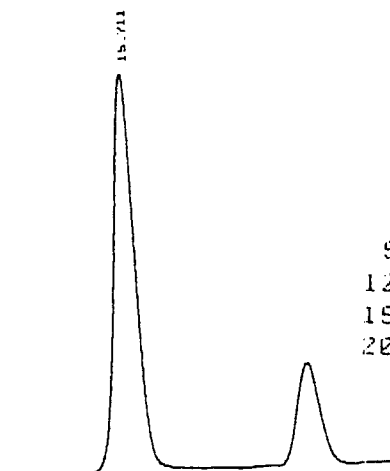

| RT     | AREA     | TYPE | WIDTH | AREAX    |
|--------|----------|------|-------|----------|
| 5.005  | 20494    | PB   | .118  | .05736   |
| 12.148 | 61188    | UU   | .195  | .17126   |
| 15.711 | 27705472 | PU   | .636  | 77.54688 |
| 20.541 | 7940237  | UU   | .712  | 22.22451 |
